# Supplementary material
Source: PubMed Central journal article supplement (PMC4310213)

# Supplemental Figure S1

Dscore

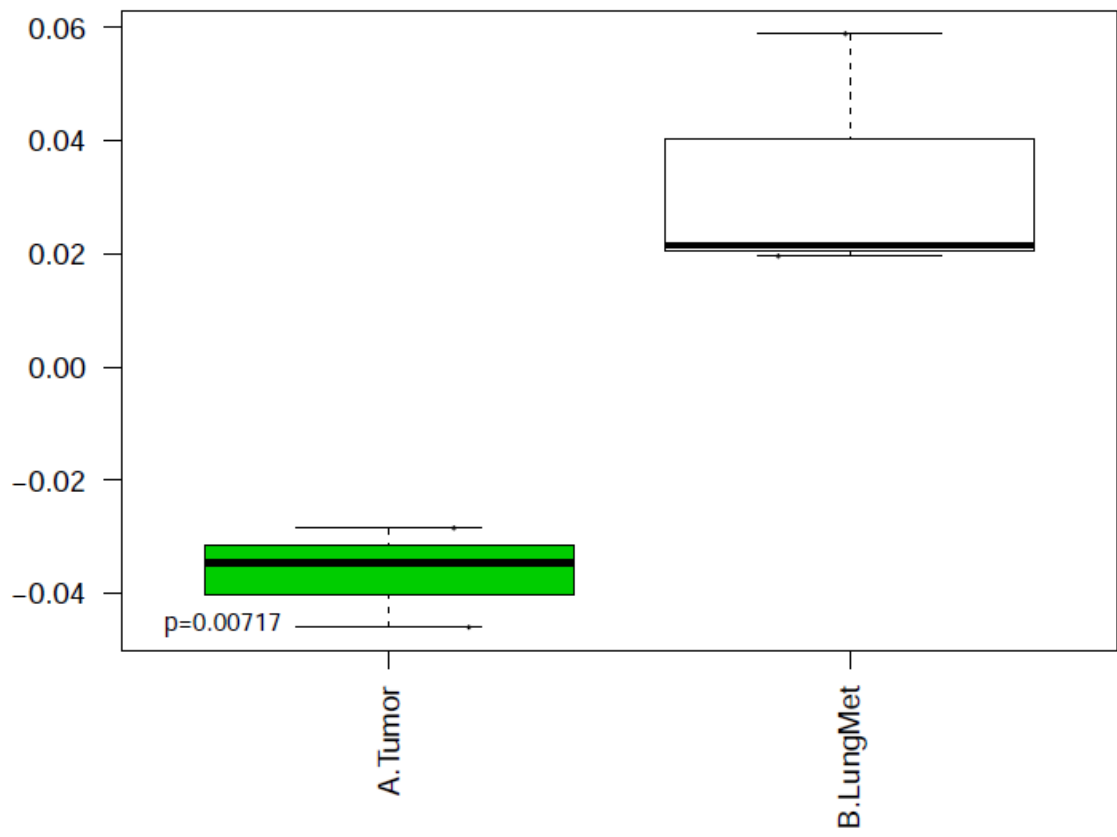

# Supplemental Figure S2

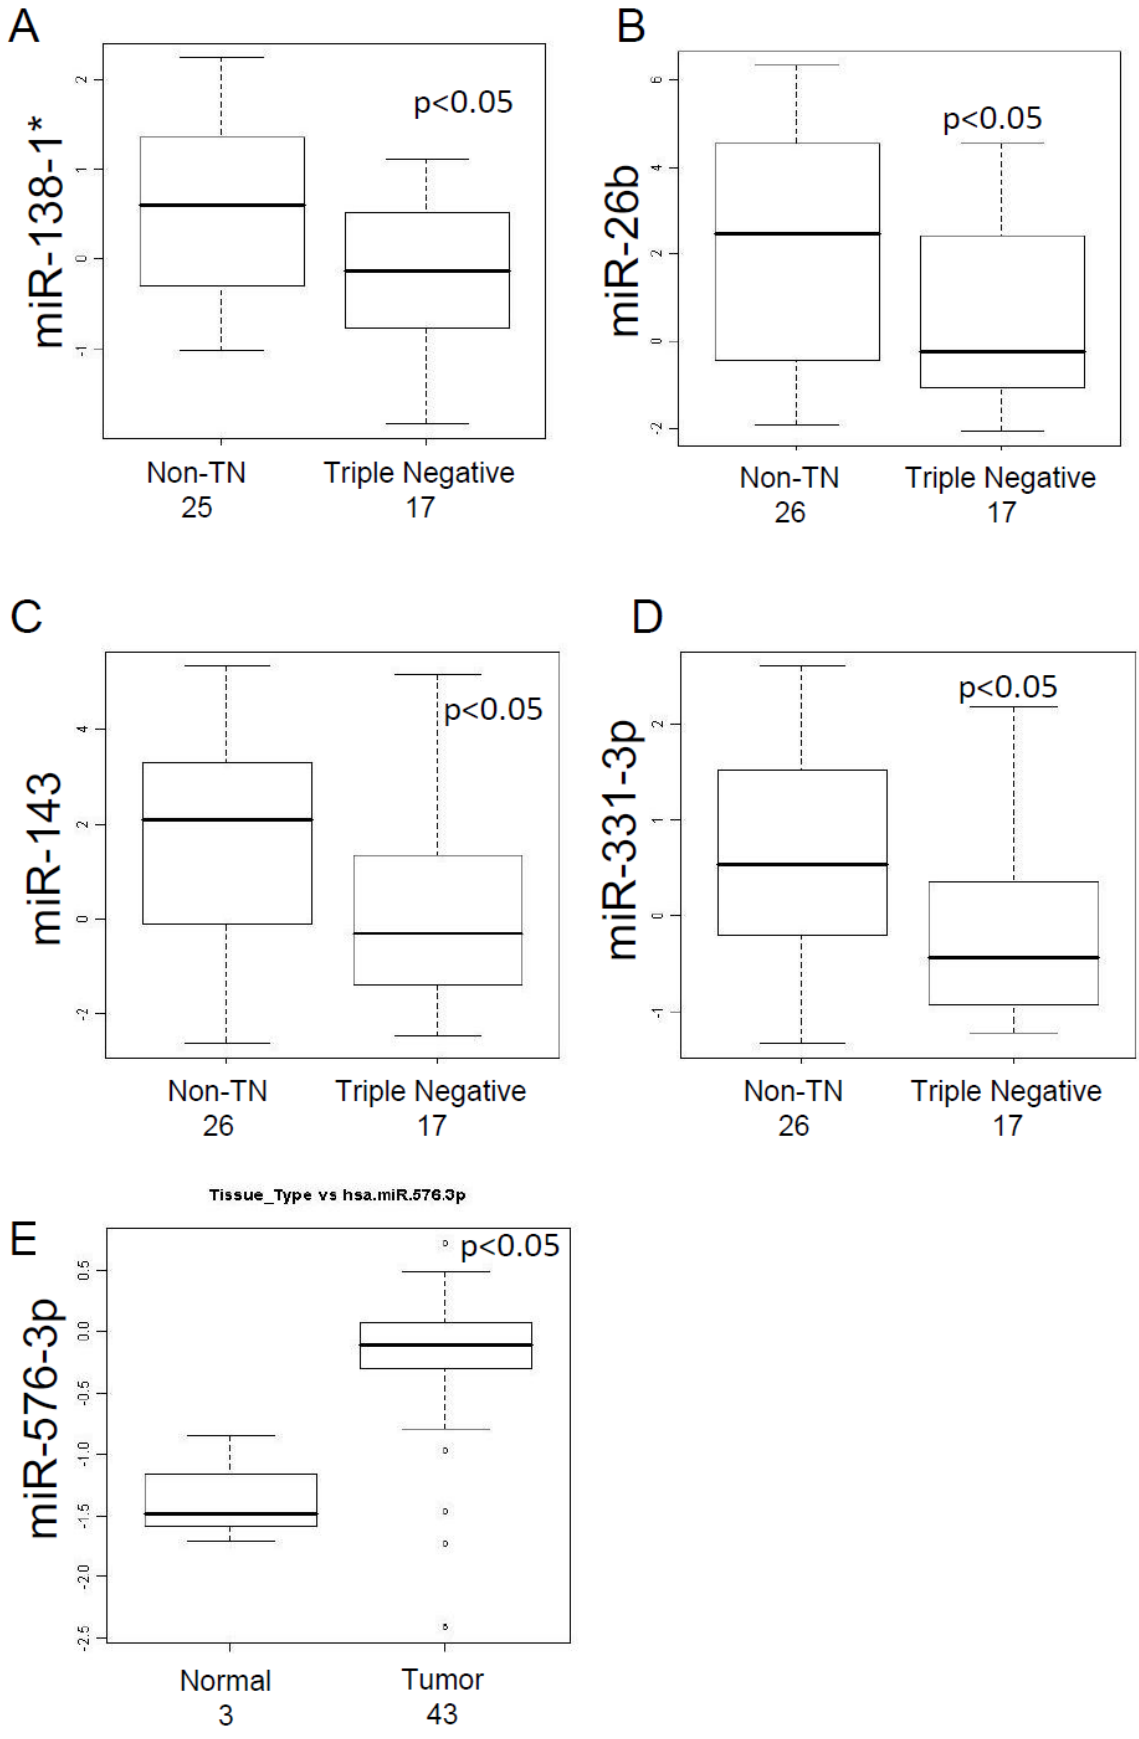

# Supplemental Figure S3

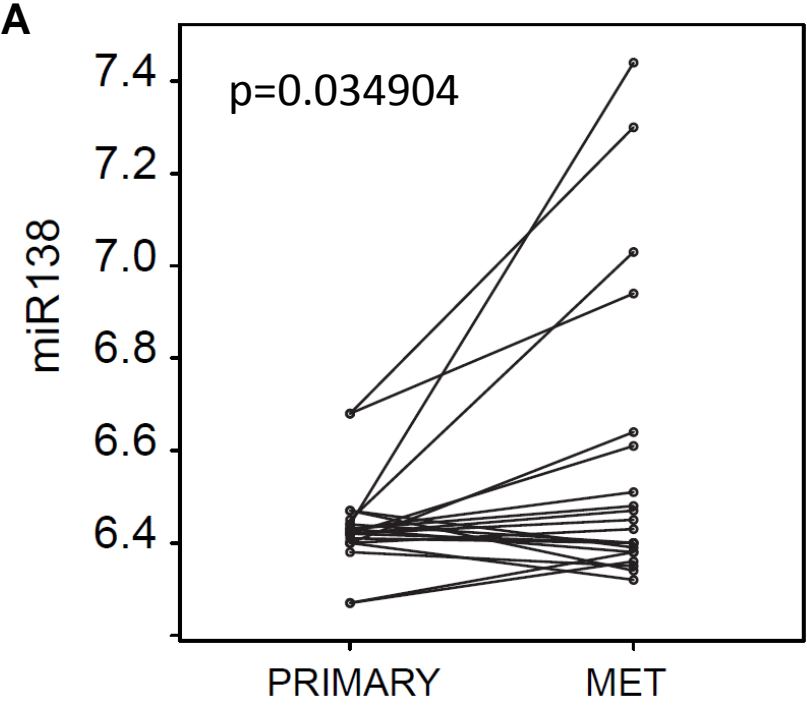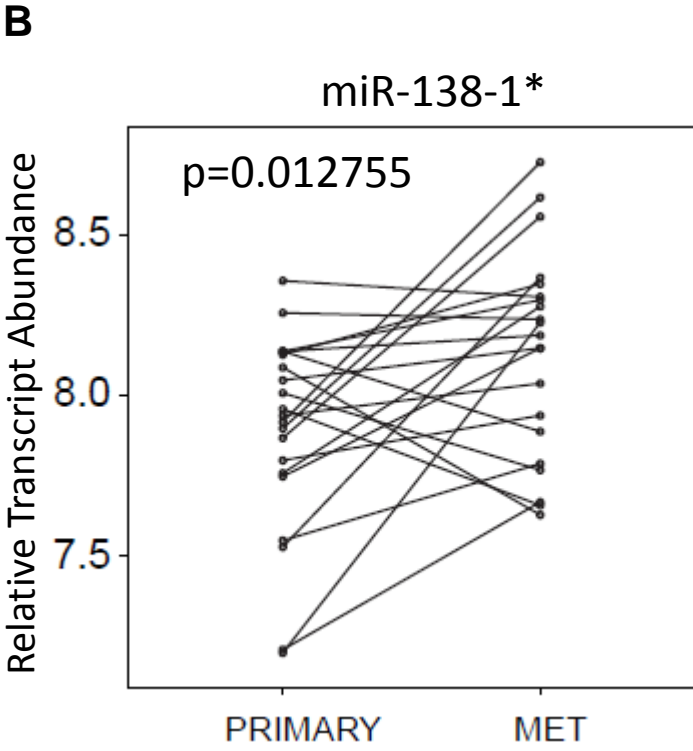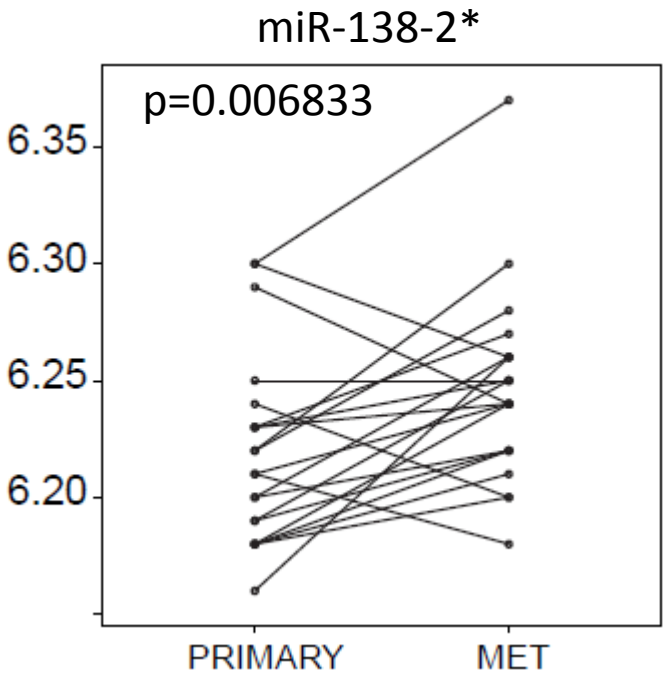

# Supplemental Figure S4

**A**

Parental

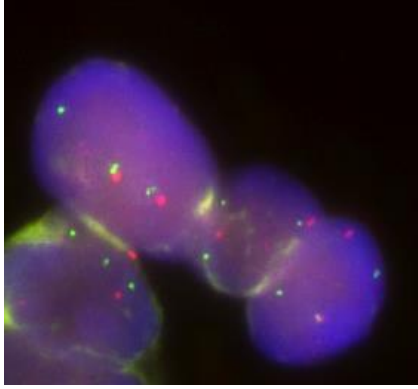

Met-derived

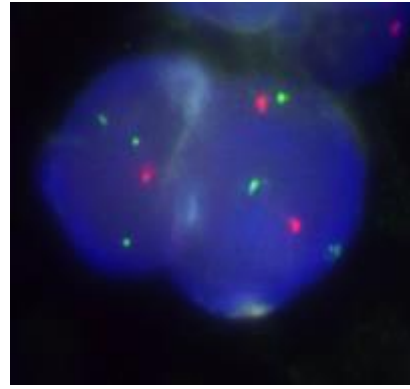

**B**

| Label       | Total miR-138 signal (50 cells) | Total CEP3 signal (50 cells) | miR-138/cell | CEP3 signal/cell |
|-------------|---------------------------------|------------------------------|--------------|------------------|
| Parental    | 150                             | 96                           | 3.0          | 1.9              |
| Met-derived | 151                             | 97                           | 3.0          | 1.9              |

# Supplemental Figure S5

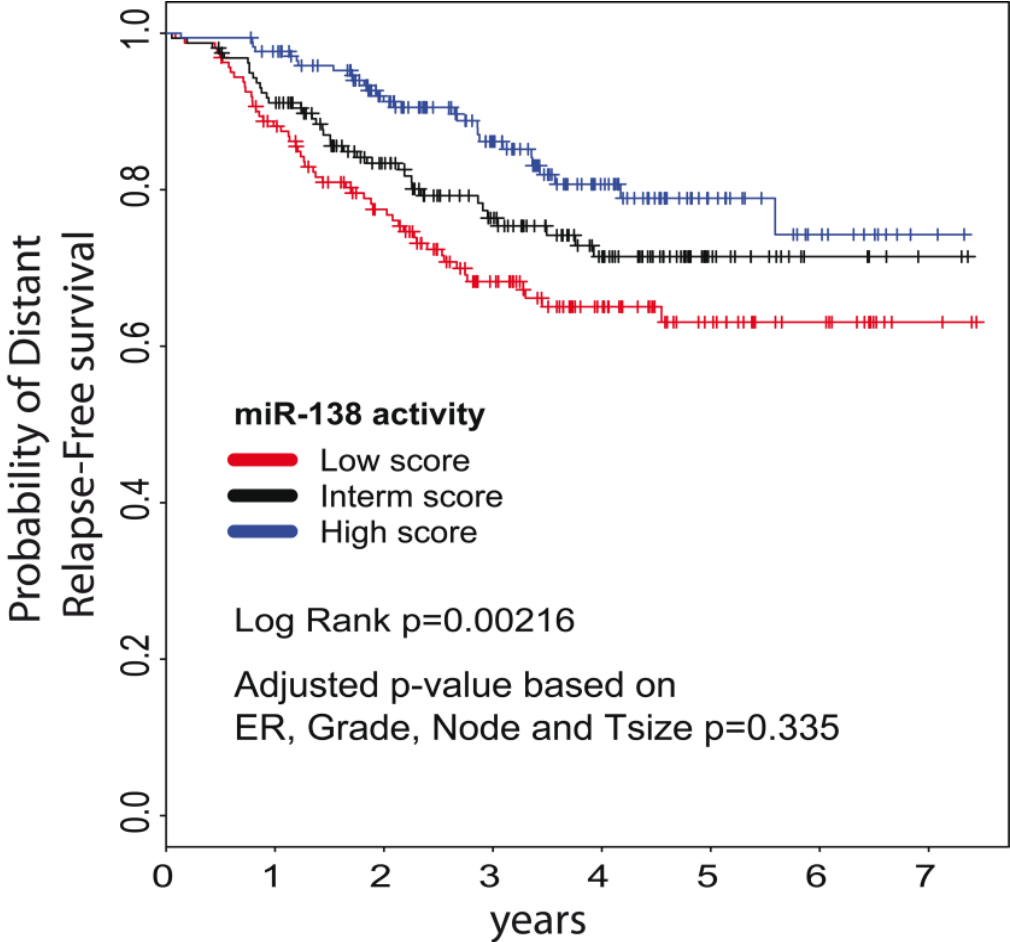

# Supplemental Figure S6

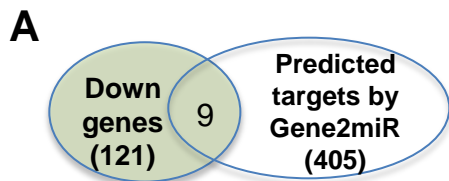

**Predicted direct targets**

EZH2  
 PPIP5K1  
 CASP3  
 FOSL1  
 EIF4EBP1  
 CLIP1  
 DEK  
 LAPTM4A  
 CCND3

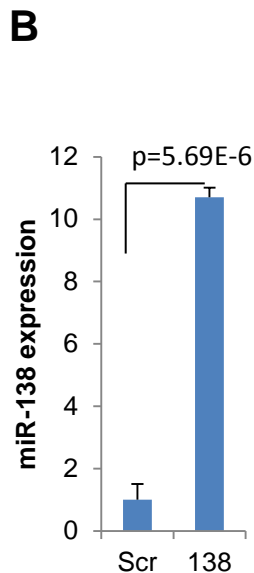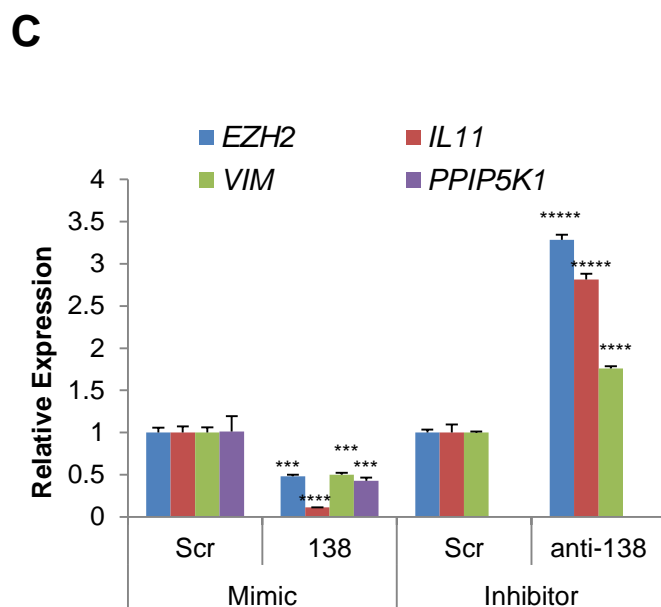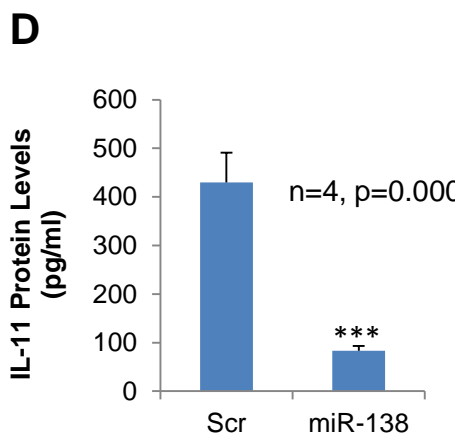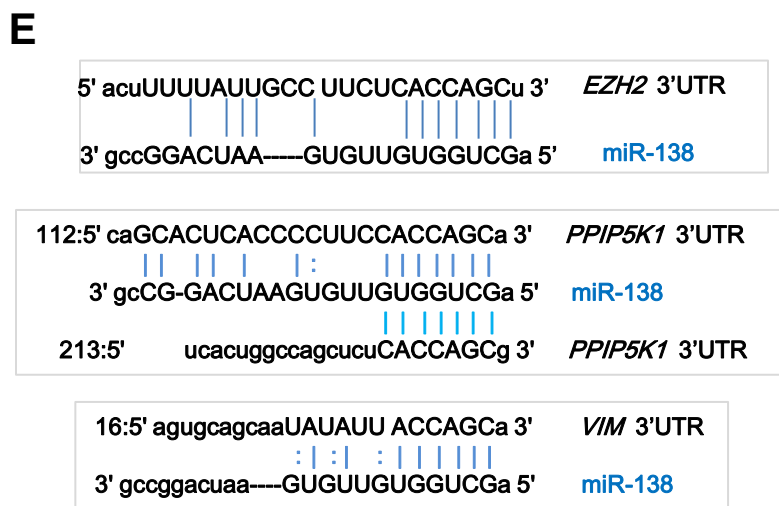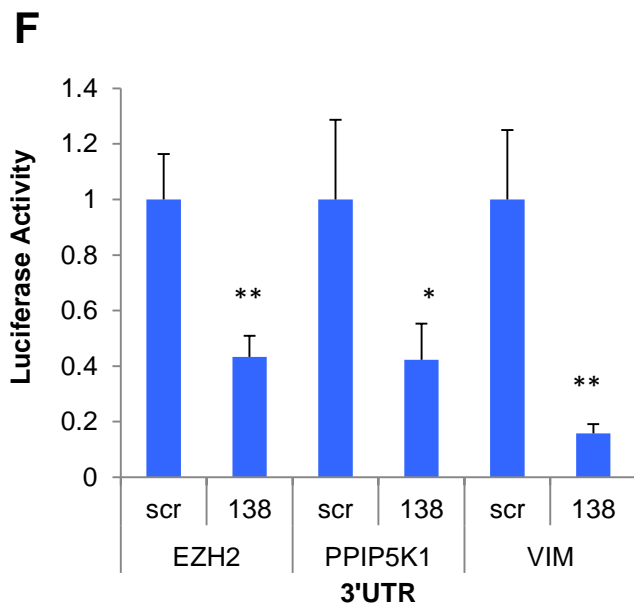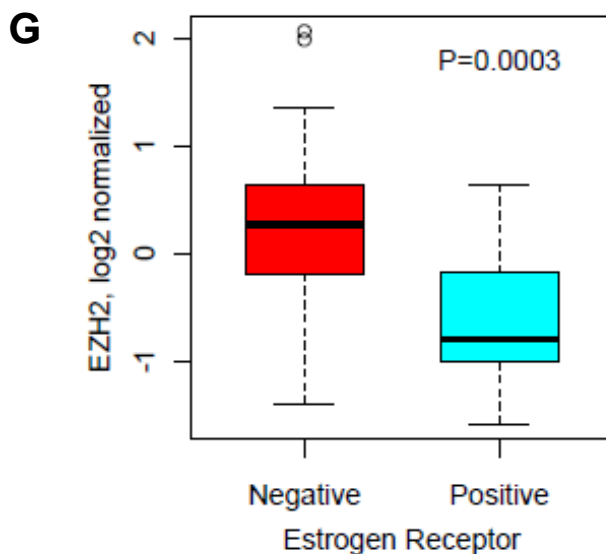

Supplement: NIHMS637782-supplement-1.pdf [file NIHMS637782-supplement-1.pdf]
