# Supplementary material
Source: PubMed Central journal article supplement (PMC4310213)
Supplement: NIHMS637782-supplement-3.pdf [file NIHMS637782-supplement-3.pdf]

Supplementary Table S1. SAM between Lung mets and Parental models microarrays

List of Significant Genes for Delta = 1.311: **Positive genes (934)** and **Negative genes (297)**

| Row   | Gene ID                     | Gene Name                                                                                              | Score(d)    | Numerator(r) | Denominator(s+s0) | Fold Change | q-value(%) |
|-------|-----------------------------|--------------------------------------------------------------------------------------------------------|-------------|--------------|-------------------|-------------|------------|
| 4326  | AGI_HUM1_OLIGO_A_23_P139715 | <a href="#">TNFRSF1A ^ Tumor necrosis factor receptor superfamily, member 1A ^ 7132</a>                | 19.51800739 | 5.61         | 0.287426882       | 48.84029469 | 0          |
| 39606 | AGI_OLIGO_NM_033339_2_2286  | <a href="#">CASP7 ^ Caspase 7, apoptosis-related cysteine protease ^ 840</a>                           | 12.37741195 | 2.399        | 0.193820809       | 5.274374458 | 0          |
| 11237 | AGI_HUM1_OLIGO_A_23_P253012 | <a href="#">^ ^</a>                                                                                    | 11.89534104 | 3.780333333  | 0.317799491       | 13.74022128 | 0          |
| 18463 | AGI_HUM1_OLIGO_A_23_P45324  | <a href="#">TMEM35 ^ Transmembrane protein 35 ^ 59353</a>                                              | 11.25386688 | 4.096        | 0.363963786       | 17.10089586 | 0          |
| 18742 | AGI_HUM1_OLIGO_A_23_P47879  | <a href="#">STAT6 ^ Signal transducer and activator of transcription 6, interleukin-4 induced ^ 67</a> | 11.21942417 | 4.32         | 0.385046499       | 19.97328878 | 0          |
| 20981 | AGI_HUM1_OLIGO_A_23_P66798  | <a href="#">KRT19 ^ Keratin 19 ^ 3880</a>                                                              | 11.14304224 | 3.903333333  | 0.350293326       | 14.96305997 | 0          |
| 38055 | AGI_OLIGO_NM_002276_2_1204  | <a href="#">KRT19 ^ Keratin 19 ^ 3880</a>                                                              | 10.74089937 | 4.076666667  | 0.379546119       | 16.87325807 | 0          |
| 258   | AGI_HUM1_OLIGO_A_23_P101960 | <a href="#">ZFP3612 ^ Zinc finger protein 36, C3H type-like 2 ^ 678</a>                                | 10.51685766 | 2.391666667  | 0.227412669       | 5.247632418 | 0          |
| 27794 | AGI_HUM1_OLIGO_A_24_P298409 | <a href="#">HLA-C ^ Major histocompatibility complex, class I, C ^ 3107</a>                            | 10.26561193 | 2.583        | 0.251616759       | 5.991843738 | 0          |
| 28638 | AGI_HUM1_OLIGO_A_24_P348203 | <a href="#">FLJ23420 ^ Hypothetical protein FLJ23420 ^ 80131</a>                                       | 9.953152401 | 2.254925926  | 0.226553943       | 4.773097895 | 0          |
| 34608 | AGI_HUM1_OLIGO_A_32_P28284  | <a href="#">TPM4 ^ Tropomyosin 4 ^ 7171</a>                                                            | 9.844827397 | 3.096666667  | 0.314547583       | 8.554399989 | 0          |
| 10946 | AGI_HUM1_OLIGO_A_23_P250629 | <a href="#">PSMB8 ^ Proteasome (prosome, macropain) subunit, beta type, 8 (large multifunctio</a>      | 9.72628786  | 2.107666667  | 0.216697953       | 4.309936658 | 0          |
| 29260 | AGI_HUM1_OLIGO_A_24_P387437 | <a href="#">CTCF ^ CCCTC-binding factor (zinc finger protein)-like ^ 140690</a>                        | 9.575108532 | 1.512777778  | 0.157990666       | 2.853589431 | 0          |
| 38238 | AGI_OLIGO_NM_003153_3_3529  | <a href="#">STAT6 ^ Signal transducer and activator of transcription 6, interleukin-4 induced ^ 67</a> | 9.376958211 | 3.106666667  | 0.331308575       | 8.613900546 | 0          |
| 26476 | AGI_HUM1_OLIGO_A_24_P216294 | <a href="#">CST3 ^ Cystatin C (amyloid angiopathy and cerebral hemorrhage) ^ 1471</a>                  | 9.180673505 | 1.591666667  | 0.173371449       | 3.013973363 | 0          |
| 25697 | AGI_HUM1_OLIGO_A_24_P16856  | <a href="#">DXYS155E ^ DNA segment on chromosome X and Y (unique) 155 expressed sequence</a>           | 8.985673038 | 1.553962037  | 0.172937746       | 2.936224007 | 0          |
| 25297 | AGI_HUM1_OLIGO_A_24_P142743 | <a href="#">CNN2 ^ Calponin 2 ^ 1265</a>                                                               | 8.913423262 | 3.007333333  | 0.337393754       | 8.040768161 | 0          |
| 38961 | AGI_OLIGO_NM_007222_1_3742  | <a href="#">ZHX1 ^ Zinc fingers and homeoboxes 1 ^ 11244</a>                                           | 8.89873173  | 1.070666667  | 0.120316771       | 2.100403736 | 0          |
| 30783 | AGI_HUM1_OLIGO_A_24_P71700  | <a href="#">KIAA1190 ^ Hypothetical protein KIAA1190 ^ 92999</a>                                       | 8.882733457 | 1.668333333  | 0.187817561       | 3.178471898 | 0          |
| 34304 | AGI_HUM1_OLIGO_A_32_P221256 | <a href="#">MGC70870 ^ Hypothetical LOC403340 ^ 403340</a>                                             | 8.81842868  | 1.336666667  | 0.151576513       | 2.525670902 | 0          |
| 17752 | AGI_HUM1_OLIGO_A_23_P42375  | <a href="#">RAB32 ^ RAB32, member RAS oncogene family ^ 10981</a>                                      | 8.80212193  | 2.13         | 0.241987105       | 4.377174805 | 0          |
| 1503  | AGI_HUM1_OLIGO_A_23_P113716 | <a href="#">HLA-C ^ Major histocompatibility complex, class I, C ^ 3107</a>                            | 8.781396619 | 3.023333333  | 0.344288439       | 8.130439457 | 0          |
| 9821  | AGI_HUM1_OLIGO_A_23_P213386 | <a href="#">BASP1 ^ Brain abundant, membrane attached signal protein 1 ^ 10409</a>                     | 8.706271589 | 4.012666667  | 0.460893808       | 16.14109633 | 0          |
| 4372  | AGI_HUM1_OLIGO_A_23_P140146 | <a href="#">FAM14A ^ Family with sequence similarity 14, member A ^ 83982</a>                          | 8.693801389 | 2.680333333  | 0.308303953       | 6.410039883 | 0          |
| 5749  | AGI_HUM1_OLIGO_A_23_P152559 | <a href="#">BZRAP1 ^ Benzodiazapine receptor (peripheral) associated protein 1 ^ 9256</a>              | 8.578324179 | 1.633        | 0.190363522       | 3.101572825 | 0          |
| 22775 | AGI_HUM1_OLIGO_A_23_P83436  | <a href="#">PEPD ^ Peptidase D ^ 5184</a>                                                              | 8.533819092 | 1.87         | 0.219128151       | 3.655325801 | 0          |
| 37770 | AGI_OLIGO_NM_001206_1_4791  | <a href="#">KLF9 ^ Kruppel-like factor 9 ^ 687</a>                                                     | 8.523392061 | 2.957333333  | 0.346966714       | 7.766870079 | 0          |
| 38925 | AGI_OLIGO_NM_006887_3_2016  | <a href="#">ZFP3612 ^ Zinc finger protein 36, C3H type-like 2 ^ 678</a>                                | 8.514372819 | 2.302        | 0.270366362       | 4.931409302 | 0          |
| 28001 | AGI_HUM1_OLIGO_A_24_P311926 | <a href="#">HLA-G ^ HLA-G histocompatibility antigen, class I, G ^ 3135</a>                            | 8.49584822  | 2.607        | 0.306855764       | 6.092354959 | 0          |
| 5032  | AGI_HUM1_OLIGO_A_23_P145895 | <a href="#">TP53AP1 ^ TP53 activated protein 1 ^ 11257</a>                                             | 8.470928813 | 2.553333333  | 0.301423066       | 5.869889452 | 0          |
| 38903 | AGI_OLIGO_NM_006763_2_2491  | <a href="#">BTG2 ^ BTG family, member 2 ^ 7832</a>                                                     | 8.438667535 | 2.101        | 0.248972956       | 4.290066467 | 0          |
| 9820  | AGI_HUM1_OLIGO_A_23_P213385 | <a href="#">BASP1 ^ Brain abundant, membrane attached signal protein 1 ^ 10409</a>                     | 8.299594337 | 4.343666667  | 0.523358913       | 20.3036425  | 0          |
| 17381 | AGI_HUM1_OLIGO_A_23_P415401 | <a href="#">KLF9 ^ Kruppel-like factor 9 ^ 687</a>                                                     | 8.259811785 | 3.024666667  | 0.366190749       | 8.137957052 | 0          |
| 4938  | AGI_HUM1_OLIGO_A_23_P145074 | <a href="#">PNRC1 ^ Proline-rich nuclear receptor coactivator 1 ^ 10957</a>                            | 8.239249702 | 1.670333333  | 0.202728816       | 3.182881252 | 0          |
| 4373  | AGI_HUM1_OLIGO_A_23_P140152 | <a href="#">FAM14A ^ Family with sequence similarity 14, member A ^ 83982</a>                          | 8.181512782 | 1.820666667  | 0.222534232       | 3.532443944 | 0          |
| 39418 | AGI_OLIGO_NM_021800_1_629   | <a href="#">DNAJC12 ^ DnaJ (Hsp40) homolog, subfamily C, member 12 ^ 56521</a>                         | 8.134804647 | 3.401333333  | 0.418121084       | 10.56582367 | 0          |
| 38841 | AGI_OLIGO_NM_006317_2_1437  | <a href="#">BASP1 ^ Brain abundant, membrane attached signal protein 1 ^ 10409</a>                     | 8.04992561  | 4.274333333  | 0.530977992       | 19.35096132 | 0          |
| 37366 | AGI_OLIGO_NKI_NM_006117     | <a href="#">PECI ^ Peroxisomal D3,D2-enoyl-CoA isomerase ^ 10455</a>                                   | 7.962231522 | 1.405        | 0.176458069       | 2.648177821 | 0          |
| 34212 | AGI_HUM1_OLIGO_A_32_P214565 | <a href="#">^ ^</a>                                                                                    | 7.9427012   | 3.323        | 0.418371523       | 10.00743264 | 0          |
| 35761 | AGI_HUM1_OLIGO_A_32_P88415  | <a href="#">MYOZ3 ^ Myozenin 3 ^ 91977</a>                                                             | 7.941079854 | 1.802        | 0.226921279       | 3.487032958 | 0          |
| 17511 | AGI_HUM1_OLIGO_A_23_P418031 | <a href="#">^ ^</a>                                                                                    | 7.916739331 | 2.172333333  | 0.274397481       | 4.507518252 | 0          |
| 38352 | AGI_OLIGO_NM_003651_3_1372  | <a href="#">CSDA ^ Cold shock domain protein A ^ 8531</a>                                              | 7.839211606 | 2.683        | 0.342253805       | 6.42189911  | 0          |
| 12041 | AGI_HUM1_OLIGO_A_23_P26243  | <a href="#">CCNDBP1 ^ Cyclin D-type binding-protein 1 ^ 23582</a>                                      | 7.798686441 | 1.328666667  | 0.170370572       | 2.511704368 | 0          |
| 21897 | AGI_HUM1_OLIGO_A_23_P75299  | <a href="#">LHPP ^ Phospholysine phosphohistidine inorganic pyrophosphate phosphatase ^ 640</a>        | 7.538341402 | 2.235666667  | 0.296572754       | 4.709802837 | 0.88708613 |
| 24802 | AGI_HUM1_OLIGO_A_24_P113674 | <a href="#">HLA-B ^ Major histocompatibility complex, class I, B ^ 3106</a>                            | 7.537200945 | 2.674        | 0.354773612       | 6.381961918 | 0.88708613 |
| 14416 | AGI_HUM1_OLIGO_A_23_P345650 | <a href="#">KIAA1280 ^ KIAA1280 protein ^ 55841</a>                                                    | 7.388823449 | 3.299666667  | 0.446575384       | 9.846879932 | 0.88708613 |

Supplementary Table S1. SAM between Lung mets and Parental models microarrays

List of Significant Genes for Delta = 1.311: Positive genes (934) and Negative genes (297)

| Row   | Gene ID                     | Gene Name                                                                                 | Score(d)    | Numerator(r) | Denominator(s+s0) | Fold Change | q-value(%) |
|-------|-----------------------------|-------------------------------------------------------------------------------------------|-------------|--------------|-------------------|-------------|------------|
| 38377 | AGI_OLIGO_NM_003793_2_1950  | <a href="#">CTSF ^ Cathepsin F ^ 8722</a>                                                 | 7.366804647 | 1.952333333  | 0.265017661       | 3.869999375 | 0.88708613 |
| 217   | AGI_HUM1_OLIGO_A_23_P101615 | <a href="#">ZNF565 ^ Zinc finger protein 565 ^ 147929</a>                                 | 7.346957061 | 1.636333333  | 0.222722594       | 3.108747265 | 0.88708613 |
| 24096 | AGI_HUM1_OLIGO_A_23_P95917  | <a href="#">HLA-C ^ Major histocompatibility complex, class I, C ^ 3107</a>               | 7.337808232 | 2.811        | 0.383084419       | 7.01770839  | 0.88708613 |
| 1784  | AGI_HUM1_OLIGO_A_23_P116533 | <a href="#">SWAP70 ^ SWAP-70 protein ^ 23075</a>                                          | 7.304297843 | 1.371        | 0.187697713       | 2.586497864 | 0.88708613 |
| 4584  | AGI_HUM1_OLIGO_A_23_P141974 | <a href="#">TPM4 ^ Tropomyosin 4 ^ 7171</a>                                               | 7.282137759 | 1.793333333  | 0.246264681       | 3.466148183 | 0.88708613 |
| 37733 | AGI_OLIGO_NM_001065_2_2074  | <a href="#">TNFRSF1A ^ Tumor necrosis factor receptor superfamily, member 1A ^ 7132</a>   | 7.254209884 | 4.209666667  | 0.580306709       | 18.50273541 | 0.88708613 |
| 10798 | AGI_HUM1_OLIGO_A_23_P24345  | <a href="#">SLC39A13 ^ Solute carrier family 39 (zinc transporter), member 13 ^ 91252</a> | 7.235987835 | 0.984        | 0.135986962       | 1.977941833 | 0.88708613 |
| 29534 | AGI_HUM1_OLIGO_A_24_P403561 | <a href="#">^ ^</a>                                                                       | 7.206608094 | 2.048666667  | 0.284276131       | 4.137234312 | 0.88708613 |
| 14260 | AGI_HUM1_OLIGO_A_23_P34144  | <a href="#">MAGEH1 ^ Melanoma antigen, family H, 1 ^ 28986</a>                            | 7.12541956  | 1.879        | 0.26370377        | 3.678200185 | 0.88708613 |
| 24572 | AGI_HUM1_OLIGO_A_24_P100673 | <a href="#">LOC51234 ^ Hypothetical protein LOC51234 ^ 51234</a>                          | 7.102250462 | 1.343333333  | 0.189141926       | 2.537368988 | 0.88708613 |
| 27831 | AGI_HUM1_OLIGO_A_24_P3005   | <a href="#">SCN9A ^ Sodium channel, voltage-gated, type IX, alpha ^ 6335</a>              | 7.047853977 | 4.030740741  | 0.571910365       | 16.34458386 | 0.88708613 |
| 16461 | AGI_HUM1_OLIGO_A_23_P393034 | <a href="#">HAS3 ^ Hyaluronan synthase 3 ^ 3038</a>                                       | 7.040699412 | 1.839666667  | 0.261290329       | 3.5792732   | 0.88708613 |
| 2386  | AGI_HUM1_OLIGO_A_23_P121773 | <a href="#">FRG1 ^ FSHD region gene 1 ^ 2483</a>                                          | 7.02935106  | 1.122333333  | 0.159663861       | 2.176987816 | 0.88708613 |
| 21384 | AGI_HUM1_OLIGO_A_23_P70542  | <a href="#">HLA-C ^ Major histocompatibility complex, class I, C ^ 3107</a>               | 7.022315064 | 2.398        | 0.341482827       | 5.270719807 | 0.88708613 |
| 3883  | AGI_HUM1_OLIGO_A_23_P135523 | <a href="#">HLA-B ^ Major histocompatibility complex, class I, B ^ 3106</a>               | 6.981134696 | 2.562666667  | 0.367084547       | 5.907987062 | 0.88708613 |
| 37261 | AGI_OLIGO_NKI_CONTIG4595    | <a href="#">LOC387763 ^ Hypothetical LOC387763 ^ 387763</a>                               | 6.977170665 | 2.366666667  | 0.339201487       | 5.157481234 | 0.88708613 |
| 37965 | AGI_OLIGO_NM_001964_1_3066  | <a href="#">EGR1 ^ Early growth response 1 ^ 1958</a>                                     | 6.974814498 | 2.983666667  | 0.427777207       | 7.909939536 | 0.88708613 |
| 38819 | AGI_OLIGO_NM_006227_1_1404  | <a href="#">PLTP ^ Phospholipid transfer protein ^ 5360</a>                               | 6.955264891 | 2.58         | 0.370942019       | 5.979396995 | 0.88708613 |
| 15003 | AGI_HUM1_OLIGO_A_23_P35912  | <a href="#">CASP4 ^ Caspase 4, apoptosis-related cysteine protease ^ 837</a>              | 6.883923218 | 2.134666667  | 0.310094491       | 4.391356519 | 0.88708613 |
| 20016 | AGI_HUM1_OLIGO_A_23_P57856  | <a href="#">BCL6 ^ B-cell CLL/lymphoma 6 (zinc finger protein 51) ^ 604</a>               | 6.880654627 | 2.355        | 0.342263945       | 5.115942325 | 0.88708613 |
| 30223 | AGI_HUM1_OLIGO_A_24_P550411 | <a href="#">FGB ^ Fibrinogen, B beta polypeptide ^ 2244</a>                               | 6.875380179 | 1.334722222  | 0.194130679       | 2.522269131 | 0.88708613 |
| 38353 | AGI_OLIGO_NM_003651_3_1818  | <a href="#">CSDA ^ Cold shock domain protein A ^ 8531</a>                                 | 6.842204083 | 3.874333333  | 0.56624054        | 14.66528632 | 0.88708613 |
| 23668 | AGI_HUM1_OLIGO_A_23_P91912  | <a href="#">PLSCR4 ^ Phospholipid scramblase 4 ^ 57088</a>                                | 6.838037427 | 2.298333333  | 0.336110084       | 4.918891843 | 0.88708613 |
| 6414  | AGI_HUM1_OLIGO_A_23_P158425 | <a href="#">CST2 ^ Cystatin SA ^ 1470</a>                                                 | 6.835521259 | 1.371666667  | 0.200667457       | 2.587693356 | 0.88708613 |
| 37932 | AGI_OLIGO_NM_001873_1_2102  | <a href="#">CPE ^ Carboxypeptidase E ^ 1363</a>                                           | 6.824959981 | 3.241        | 0.474874579       | 9.454492375 | 0.88708613 |
| 33053 | AGI_HUM1_OLIGO_A_32_P134402 | <a href="#">EIF4A2 ^ Eukaryotic translation initiation factor 4A, isoform 2 ^ 1974</a>    | 6.820606318 | 1.714        | 0.251297307       | 3.280691645 | 0.88708613 |
| 38428 | AGI_OLIGO_NM_004099_3_2921  | <a href="#">STOM ^ Stomatin ^ 2040</a>                                                    | 6.819759821 | 1.200666667  | 0.176057031       | 2.298458578 | 0.88708613 |
| 36590 | AGI_OLIGO_AK098572_1_1133   | <a href="#">PABPC1 ^ Poly(A) binding protein, cytoplasmic 1 ^ 26986</a>                   | 6.791255956 | 1.443333333  | 0.21252819        | 2.719484746 | 0.88708613 |
| 18579 | AGI_HUM1_OLIGO_A_23_P46441  | <a href="#">PVRL4 ^ Poliovirus receptor-related 4 ^ 81607</a>                             | 6.783196768 | 1.809966667  | 0.266830925       | 3.506341871 | 0.88708613 |
| 27506 | AGI_HUM1_OLIGO_A_24_P280113 | <a href="#">IL13RA1 ^ Interleukin 13 receptor, alpha 1 ^ 3597</a>                         | 6.727363449 | 1.92         | 0.285401557       | 3.784230587 | 0.88708613 |
| 5204  | AGI_HUM1_OLIGO_A_23_P14754  | <a href="#">HAPLN3 ^ Hyaluronan and proteoglycan link protein 3 ^ 145864</a>              | 6.680379801 | 2.052033333  | 0.307173154       | 4.146900217 | 0.88708613 |
| 1910  | AGI_HUM1_OLIGO_A_23_P117683 | <a href="#">HYPK ^ Huntingtin interacting protein K ^ 25764</a>                           | 6.641753212 | 1.014666667  | 0.152770908       | 2.020436019 | 1.05974047 |
| 38840 | AGI_OLIGO_NM_006317_2_1148  | <a href="#">BASP1 ^ Brain abundant, membrane attached signal protein 1 ^ 10409</a>        | 6.627190142 | 3.576        | 0.539595201       | 11.92568309 | 1.05974047 |
| 1063  | AGI_HUM1_OLIGO_A_23_P109427 | <a href="#">GSTT2 ^ Glutathione S-transferase theta 2 ^ 2953</a>                          | 6.610798657 | 2.266666667  | 0.342873348       | 4.812100144 | 1.05974047 |
| 38962 | AGI_OLIGO_NM_007233_1_385   | <a href="#">TP53AP1 ^ TP53 activated protein 1 ^ 11257</a>                                | 6.586391641 | 1.534        | 0.232904462       | 2.895876345 | 1.05974047 |
| 9901  | AGI_HUM1_OLIGO_A_23_P214080 | <a href="#">EGR1 ^ Early growth response 1 ^ 1958</a>                                     | 6.582255875 | 2.757        | 0.418853362       | 6.759891075 | 1.05974047 |
| 1323  | AGI_HUM1_OLIGO_A_23_P111888 | <a href="#">CTHRC1 ^ Collagen triple helix repeat containing 1 ^ 115908</a>               | 6.56534137  | 2.627        | 0.400131517       | 6.177401065 | 1.05974047 |
| 39048 | AGI_OLIGO_NM_014033_1_1512  | <a href="#">DKFZP586A0522 ^ DKFZP586A0522 protein ^ 25840</a>                             | 6.557890082 | 1.654333333  | 0.252266097       | 3.147776988 | 1.05974047 |
| 22620 | AGI_HUM1_OLIGO_A_23_P81938  | <a href="#">HLA-B ^ Major histocompatibility complex, class I, B ^ 3106</a>               | 6.557048824 | 2.941666667  | 0.448626622       | 7.682983356 | 1.05974047 |
| 7478  | AGI_HUM1_OLIGO_A_23_P168037 | <a href="#">HLA-A ^ Major histocompatibility complex, class I, A ^ 3105</a>               | 6.519060185 | 2.690333333  | 0.412687298       | 6.454625237 | 1.05974047 |
| 4258  | AGI_HUM1_OLIGO_A_23_P139104 | <a href="#">^ ^</a>                                                                       | 6.517294039 | 2.215333333  | 0.339916125       | 4.6438885   | 1.05974047 |
| 39276 | AGI_OLIGO_NM_017763_1_3368  | <a href="#">FLJ20315 ^ Hypothetical protein FLJ20315 ^ 54894</a>                          | 6.514887524 | 2.035666667  | 0.312463824       | 4.100121513 | 1.05974047 |
| 11149 | AGI_HUM1_OLIGO_A_23_P25229  | <a href="#">CSDA ^ Cold shock domain protein A ^ 8531</a>                                 | 6.468041255 | 1.746666667  | 0.27004569        | 3.355823099 | 1.05974047 |
| 18598 | AGI_HUM1_OLIGO_A_23_P4662   | <a href="#">BCL3 ^ B-cell CLL/lymphoma 3 ^ 602</a>                                        | 6.464894557 | 2.746        | 0.424755574       | 6.708545476 | 1.05974047 |
| 21227 | AGI_HUM1_OLIGO_A_23_P69109  | <a href="#">PLSCR1 ^ Phospholipid scramblase 1 ^ 5359</a>                                 | 6.461886069 | 1.352333333  | 0.209278424       | 2.553247395 | 1.05974047 |
| 10811 | AGI_HUM1_OLIGO_A_23_P2446   | <a href="#">TMEM5 ^ Transmembrane protein 5 ^ 10329</a>                                   | 6.452156884 | 0.761333333  | 0.117996718       | 1.695056466 | 1.05974047 |

Supplementary Table S1. SAM between Lung mets and Parental models microarrays

## List of Significant Genes for Delta = 1.311: Positive genes (934) and Negative genes (297)

| Row   | Gene ID                     | Gene Name                                                                                                | Score(d)    | Numerator(r) | Denominator(s+s0) | Fold Change | q-value(%) |
|-------|-----------------------------|----------------------------------------------------------------------------------------------------------|-------------|--------------|-------------------|-------------|------------|
| 18327 | AGI_HUM1_OLIGO_A_23_P43964  | <a href="#">LHPP ^ Phospholysine phosphohistidine inorganic pyrophosphate phosphatase ^ 640</a>          | 6.449194779 | 2.413333333  | 0.374206923       | 5.327037118 | 1.05974047 |
| 12627 | AGI_HUM1_OLIGO_A_23_P303251 | <a href="#">^ ^</a>                                                                                      | 6.433619083 | 3.612        | 0.56142584        | 12.22701217 | 1.05974047 |
| 10138 | AGI_HUM1_OLIGO_A_23_P216023 | <a href="#">ANGPT1 ^ Angiotensin II type 1 receptor 1 ^ 284</a>                                          | 6.418922682 | 2.256333333  | 0.351512776       | 4.777756517 | 1.05974047 |
| 35101 | AGI_HUM1_OLIGO_A_32_P48438  | <a href="#">^ ^</a>                                                                                      | 6.386588448 | 1.757333333  | 0.275159946       | 3.380726561 | 1.05974047 |
| 16865 | AGI_HUM1_OLIGO_A_23_P402899 | <a href="#">MGC19764 ^ Hypothetical protein MGC19764 ^ 162394</a>                                        | 6.376129378 | 1.883666667  | 0.295424788       | 3.690117274 | 1.05974047 |
| 36885 | AGI_OLIGO_BC018999_1_1182   | <a href="#">SMPDL3A ^ Sphingomyelin phosphodiesterase, acid-like 3A ^ 10924</a>                          | 6.359451498 | 2.51         | 0.394688127       | 5.696200782 | 1.05974047 |
| 13925 | AGI_HUM1_OLIGO_A_23_P333528 | <a href="#">HLA-A ^ Major histocompatibility complex, class I, A ^ 3105</a>                              | 6.352816944 | 2.298        | 0.361729296       | 4.917755469 | 1.05974047 |
| 21258 | AGI_HUM1_OLIGO_A_23_P69383  | <a href="#">PARP9 ^ Poly (ADP-ribose) polymerase family, member 9 ^ 83666</a>                            | 6.342792682 | 1.513333333  | 0.238591013       | 2.854688508 | 1.05974047 |
| 36972 | AGI_OLIGO_BF110534_1_494    | <a href="#">RASGEF1B ^ RasGEF domain family, member 1B ^ 153020</a>                                      | 6.340822633 | 1.868666667  | 0.294704138       | 3.651949123 | 1.05974047 |
| 34449 | AGI_HUM1_OLIGO_A_32_P229965 | <a href="#">PBP ^ Prostatic binding protein ^ 5037</a>                                                   | 6.336024928 | 1.132798942  | 0.178787008       | 2.192837556 | 1.05974047 |
| 38904 | AGI_OLIGO_NM_006763_2_2532  | <a href="#">BTG2 ^ BTG family, member 2 ^ 7832</a>                                                       | 6.327434505 | 1.932333333  | 0.305389701       | 3.81671995  | 1.05974047 |
| 13912 | AGI_HUM1_OLIGO_A_23_P333029 | <a href="#">FLJ39553 ^ Hypothetical protein FLJ39553 ^ 203111</a>                                        | 6.289185793 | 4.243047619  | 0.674657699       | 18.93584135 | 1.05974047 |
| 37667 | AGI_OLIGO_NM_000713_1_729   | <a href="#">BLVRB ^ Biliverdin reductase B (flavin reductase (NADPH)) ^ 645</a>                          | 6.284468941 | 0.997666667  | 0.158751149       | 1.996767928 | 1.05974047 |
| 20624 | AGI_HUM1_OLIGO_A_23_P63541  | <a href="#">FLJ10157 ^ Hypothetical protein FLJ10157 ^ 55083</a>                                         | 6.275200026 | 3.247333333  | 0.517486824       | 9.49608819  | 1.05974047 |
| 16476 | AGI_HUM1_OLIGO_A_23_P3934   | <a href="#">FLJ20315 ^ Hypothetical protein FLJ20315 ^ 54894</a>                                         | 6.253045375 | 2.484        | 0.397246438       | 5.594464331 | 1.05974047 |
| 17828 | AGI_HUM1_OLIGO_A_23_P425752 | <a href="#">TRIM14 ^ Tripartite motif-containing 14 ^ 9830</a>                                           | 6.238272006 | 1.098448148  | 0.176082118       | 2.141242433 | 1.05974047 |
| 19391 | AGI_HUM1_OLIGO_A_23_P52176  | <a href="#">ZNF124 ^ Zinc finger protein 124 (HZF-16) ^ 7678</a>                                         | 6.229100042 | 1.397666667  | 0.224376982       | 2.634751076 | 1.05974047 |
| 3181  | AGI_HUM1_OLIGO_A_23_P129188 | <a href="#">CALML4 ^ Calmodulin-like 4 ^ 91860</a>                                                       | 6.217225052 | 1.09         | 0.175319373       | 2.128740365 | 1.05974047 |
| 21433 | AGI_HUM1_OLIGO_A_23_P70968  | <a href="#">HOXA7 ^ Homeobox A7 ^ 3204</a>                                                               | 6.215259887 | 1.42         | 0.228469931       | 2.67585511  | 1.05974047 |
| 9456  | AGI_HUM1_OLIGO_A_23_P210540 | <a href="#">^ ^</a>                                                                                      | 6.185265882 | 2.056666667  | 0.332510632       | 4.160239736 | 1.05974047 |
| 22985 | AGI_HUM1_OLIGO_A_23_P85619  | <a href="#">^ ^</a>                                                                                      | 6.184415957 | 1.433        | 0.231711452       | 2.70007597  | 1.05974047 |
| 4886  | AGI_HUM1_OLIGO_A_23_P144627 | <a href="#">PCDHB13 ^ Protocadherin beta 13 ^ 56123</a>                                                  | 6.176840535 | 1.344        | 0.217586967       | 2.538541772 | 1.05974047 |
| 9417  | AGI_HUM1_OLIGO_A_23_P210210 | <a href="#">EPAS1 ^ Endothelial PAS domain protein 1 ^ 2034</a>                                          | 6.158993332 | 1.996666667  | 0.324187178       | 3.990768706 | 1.05974047 |
| 20532 | AGI_HUM1_OLIGO_A_23_P62659  | <a href="#">PPT1 ^ Palmitoyl-protein thioesterase 1 (ceroid-lipofuscinosis, neuronal 1, infantile) ^</a> | 6.155510437 | 1.395666667  | 0.226734514       | 2.631101066 | 1.05974047 |
| 11803 | AGI_HUM1_OLIGO_A_23_P258088 | <a href="#">PACSIN1 ^ Protein kinase C and casein kinase substrate in neurons 1 ^ 29993</a>              | 6.152454197 | 1.468666667  | 0.238712328       | 2.767659893 | 1.05974047 |
| 22879 | AGI_HUM1_OLIGO_A_23_P84483  | <a href="#">C7orf10 ^ Chromosome 7 open reading frame 10 ^ 79783</a>                                     | 6.132977299 | 1.359888889  | 0.221733886       | 2.566654113 | 1.05974047 |
| 11958 | AGI_HUM1_OLIGO_A_23_P259442 | <a href="#">CPE ^ Carboxypeptidase E ^ 1363</a>                                                          | 6.128032587 | 3.062333333  | 0.499725367       | 8.353225201 | 1.05974047 |
| 18984 | AGI_HUM1_OLIGO_A_23_P500130 | <a href="#">ANKRD15 ^ Ankyrin repeat domain 15 ^ 23189</a>                                               | 6.121697552 | 2.650333333  | 0.432940914       | 6.27812317  | 1.05974047 |
| 34413 | AGI_HUM1_OLIGO_A_32_P227657 | <a href="#">^ ^</a>                                                                                      | 6.106368124 | 2.812        | 0.460502862       | 7.022574381 | 1.05974047 |
| 8888  | AGI_HUM1_OLIGO_A_23_P205961 | <a href="#">PML ^ Promyelocytic leukemia ^ 5371</a>                                                      | 6.09378038  | 2.211666667  | 0.362938362       | 4.632100859 | 1.05974047 |
| 37472 | AGI_OLIGO_NM_000099_2_452   | <a href="#">CST3 ^ Cystatin C (amyloid angiopathy and cerebral hemorrhage) ^ 1471</a>                    | 6.08718262  | 1.493666667  | 0.245378981       | 2.816037736 | 1.05974047 |
| 13307 | AGI_HUM1_OLIGO_A_23_P31893  | <a href="#">SIAT4A ^ Sialyltransferase 4A (beta-galactoside alpha-2,3-sialyltransferase) ^ 6482</a>      | 6.086837397 | 2.143        | 0.352071176       | 4.416795389 | 1.05974047 |
| 10808 | AGI_HUM1_OLIGO_A_23_P24433  | <a href="#">CTSF ^ Cathepsin F ^ 8722</a>                                                                | 6.075112345 | 1.738333333  | 0.286140113       | 3.33649498  | 1.05974047 |
| 21316 | AGI_HUM1_OLIGO_A_23_P69908  | <a href="#">GLRX ^ Glutaredoxin (thioltransferase) ^ 2745</a>                                            | 6.066094514 | 1.59         | 0.262112632       | 3.010493495 | 1.05974047 |
| 16914 | AGI_HUM1_OLIGO_A_23_P4041   | <a href="#">PCTP ^ Phosphatidylcholine transfer protein ^ 58488</a>                                      | 6.059255123 | 3.646666667  | 0.601834152       | 12.52437466 | 1.05974047 |
| 31206 | AGI_HUM1_OLIGO_A_24_P8454   | <a href="#">SPAG9 ^ Sperm associated antigen 9 ^ 9043</a>                                                | 6.044009217 | 1.272466667  | 0.210533542       | 2.415742474 | 1.05974047 |
| 4259  | AGI_HUM1_OLIGO_A_23_P139114 | <a href="#">^ ^</a>                                                                                      | 6.037680715 | 2.710566667  | 0.448941704       | 6.54578704  | 1.05974047 |
| 13091 | AGI_HUM1_OLIGO_A_23_P314024 | <a href="#">HLA-F ^ Major histocompatibility complex, class I, F ^ 3134</a>                              | 6.035100109 | 2.294666667  | 0.38022015        | 4.906406158 | 1.05974047 |
| 2726  | AGI_HUM1_OLIGO_A_23_P125107 | <a href="#">HLA-B ^ Major histocompatibility complex, class I, B ^ 3106</a>                              | 6.010220039 | 2.505333333  | 0.416845526       | 5.677805125 | 1.05974047 |
| 1669  | AGI_HUM1_OLIGO_A_23_P115417 | <a href="#">RGL1 ^ Ral guanine nucleotide dissociation stimulator-like 1 ^ 23179</a>                     | 6.008197154 | 1.733666667  | 0.288550229       | 3.3257199   | 1.05974047 |
| 16289 | AGI_HUM1_OLIGO_A_23_P389102 | <a href="#">MYO1D ^ Myosin ID ^ 4642</a>                                                                 | 6.000271731 | 1.380666667  | 0.23010069        | 2.603886684 | 1.05974047 |
| 17385 | AGI_HUM1_OLIGO_A_23_P415510 | <a href="#">LAD1 ^ Ladinin 1 ^ 3898</a>                                                                  | 5.963768298 | 1.693333333  | 0.283936808       | 3.234030609 | 1.05974047 |
| 27717 | AGI_HUM1_OLIGO_A_24_P293192 | <a href="#">FXDY3 ^ FXD domain containing ion transport regulator 3 ^ 5349</a>                           | 5.95524268  | 1.331        | 0.223500548       | 2.515769944 | 1.05974047 |
| 28765 | AGI_HUM1_OLIGO_A_24_P356916 | <a href="#">^ ^</a>                                                                                      | 5.923821341 | 1.631333333  | 0.275385303       | 3.097991817 | 1.05974047 |
| 20557 | AGI_HUM1_OLIGO_A_23_P62901  | <a href="#">BTG2 ^ BTG family, member 2 ^ 7832</a>                                                       | 5.921472585 | 1.911333333  | 0.32278007        | 3.761565816 | 1.05974047 |
| 28248 | AGI_HUM1_OLIGO_A_24_P326082 | <a href="#">HLA-E ^ Major histocompatibility complex, class I, E ^ 3133</a>                              | 5.920280278 | 2.719666667  | 0.459381404       | 6.587205995 | 1.05974047 |

Supplementary Table S1. SAM between Lung mets and Parental models microarrays

## List of Significant Genes for Delta = 1.311: Positive genes (934) and Negative genes (297)

| Row   | Gene ID                     | Gene Name                                                                                             | Score(d)    | Numerator(r) | Denominator(s+s0) | Fold Change | q-value(%) |
|-------|-----------------------------|-------------------------------------------------------------------------------------------------------|-------------|--------------|-------------------|-------------|------------|
| 35433 | AGI_HUM1_OLIGO_A_32_P69368  | <a href="#">ID2 ^ Inhibitor of DNA binding 2, dominant negative helix-loop-helix protein ^ 3398</a>   | 5.915947978 | 2.411        | 0.407542461       | 5.318428433 | 1.05974047 |
| 37889 | AGI_OLIGO_NM_001712_2_3310  | <a href="#">CEACAM1 ^ Carcinoembryonic antigen-related cell adhesion molecule 1 (biliary glyco</a>    | 5.911992976 | 3.187666667  | 0.539186477       | 9.111361603 | 1.05974047 |
| 23533 | AGI_HUM1_OLIGO_A_23_P90659  | <a href="#">LAPTM4A ^ Lysosomal-associated protein transmembrane 4 alpha ^ 9741</a>                   | 5.889809996 | 0.826333333  | 0.14029881        | 1.773173041 | 1.44863606 |
| 31387 | AGI_HUM1_OLIGO_A_24_P90097  | <a href="#">ADD3 ^ Adducin 3 (gamma) ^ 120</a>                                                        | 5.886213309 | 2.473        | 0.420134282       | 5.551970876 | 1.44863606 |
| 15000 | AGI_HUM1_OLIGO_A_23_P35906  | <a href="#">CASP4 ^ Caspase 4, apoptosis-related cysteine protease ^ 837</a>                          | 5.880584523 | 3.077333333  | 0.523303988       | 8.440528487 | 1.44863606 |
| 13310 | AGI_HUM1_OLIGO_A_23_P31896  | <a href="#">SIAT4A ^ Sialyltransferase 4A (beta-galactoside alpha-2,3-sialyltransferase) ^ 6482</a>   | 5.876155573 | 2.223666667  | 0.378422021       | 4.670790272 | 1.44863606 |
| 275   | AGI_HUM1_OLIGO_A_23_P10211  | <a href="#">SLC2A13 ^ Solute carrier family 2 (facilitated glucose transporter), member 13 ^ 1141</a> | 5.86571379  | 1.091666667  | 0.186109774       | 2.131201003 | 1.44863606 |
| 23921 | AGI_HUM1_OLIGO_A_23_P94204  | <a href="#">OXR1 ^ Oxidation resistance 1 ^ 55074</a>                                                 | 5.857775231 | 1.603666667  | 0.27376719        | 3.03914744  | 1.44863606 |
| 21436 | AGI_HUM1_OLIGO_A_23_P7099   | <a href="#">AGA ^ Aspartylglucosaminidase ^ 175</a>                                                   | 5.857199149 | 0.895        | 0.152803409       | 1.859609885 | 1.44863606 |
| 39607 | AGI_OLIGO_NM_033339_2_2501  | <a href="#">CASP7 ^ Caspase 7, apoptosis-related cysteine protease ^ 840</a>                          | 5.84297206  | 2.5229       | 0.431783684       | 5.747362316 | 1.44863606 |
| 4194  | AGI_HUM1_OLIGO_A_23_P138541 | <a href="#">AKR1C3 ^ Aldo-keto reductase family 1, member C3 (3-alpha hydroxysteroid dehydro</a>      | 5.828904884 | 1.682666667  | 0.288676295       | 3.210207754 | 1.44863606 |
| 4962  | AGI_HUM1_OLIGO_A_23_P145264 | <a href="#">HLA-F ^ Major histocompatibility complex, class I, F ^ 3134</a>                           | 5.808266386 | 2.174        | 0.374294128       | 4.51272855  | 1.44863606 |
| 20005 | AGI_HUM1_OLIGO_A_23_P57760  | <a href="#">ACPL2 ^ Acid phosphatase-like 2 ^ 92370</a>                                               | 5.791707739 | 2.580333333  | 0.44552202        | 5.980778688 | 1.44863606 |
| 26341 | AGI_HUM1_OLIGO_A_24_P208045 | <a href="#">C1orf22 ^ Chromosome 1 open reading frame 22 ^ 80267</a>                                  | 5.791283635 | 0.628666667  | 0.108553942       | 1.546135401 | 1.44863606 |
| 29240 | AGI_HUM1_OLIGO_A_24_P385313 | <a href="#">PTPRF ^ Protein tyrosine phosphatase, receptor type, F ^ 5792</a>                         | 5.789573914 | 0.844333333  | 0.145836869       | 1.795434887 | 1.44863606 |
| 22284 | AGI_HUM1_OLIGO_A_23_P78782  | <a href="#">CA11 ^ Carbonic anhydrase XI ^ 770</a>                                                    | 5.778673946 | 1.1487       | 0.198782629       | 2.217140198 | 1.44863606 |
| 35520 | AGI_HUM1_OLIGO_A_32_P74409  | <a href="#">^ ^</a>                                                                                   | 5.771714705 | 2.561666667  | 0.443831131       | 5.903893376 | 1.44863606 |
| 17094 | AGI_HUM1_OLIGO_A_23_P408353 | <a href="#">HLA-A ^ Major histocompatibility complex, class I, A ^ 3105</a>                           | 5.758909971 | 3.555        | 0.617304319       | 11.75334907 | 1.44863606 |
| 28308 | AGI_HUM1_OLIGO_A_24_P330385 | <a href="#">SLC22A17 ^ Solute carrier family 22 (organic cation transporter), member 17 ^ 51310</a>   | 5.757643016 | 1.334601852  | 0.231796561       | 2.522058696 | 1.44863606 |
| 9992  | AGI_HUM1_OLIGO_A_23_P214821 | <a href="#">EDN1 ^ Endothelin 1 ^ 1906</a>                                                            | 5.752886143 | 2.156666667  | 0.374884295       | 4.458834546 | 1.44863606 |
| 3976  | AGI_HUM1_OLIGO_A_23_P136424 | <a href="#">EPS8L2 ^ EPS8-like 2 ^ 64787</a>                                                          | 5.749465429 | 2.123        | 0.36925172        | 4.355988061 | 1.44863606 |
| 37913 | AGI_OLIGO_NM_001795_2_3394  | <a href="#">CDH5 ^ Cadherin 5, type 2, VE-cadherin (vascular epithelium) ^ 1003</a>                   | 5.744198874 | 1.7238       | 0.300094067       | 3.303052728 | 1.44863606 |
| 22755 | AGI_HUM1_OLIGO_A_23_P83277  | <a href="#">IL11RA ^ Interleukin 11 receptor, alpha ^ 3590</a>                                        | 5.732650554 | 2.040333333  | 0.355914479       | 4.113405595 | 1.44863606 |
| 16286 | AGI_HUM1_OLIGO_A_23_P38894  | <a href="#">FLJ11286 ^ Hypothetical protein FLJ11286 ^ 55337</a>                                      | 5.724962101 | 0.850666667  | 0.148589048       | 1.80333405  | 1.44863606 |
| 15555 | AGI_HUM1_OLIGO_A_23_P371966 | <a href="#">KIAA1946 ^ KIAA1946 ^ 165215</a>                                                          | 5.715029793 | 1.576666667  | 0.275880743       | 2.982798801 | 1.44863606 |
| 15531 | AGI_HUM1_OLIGO_A_23_P371410 | <a href="#">PRKACB ^ Protein kinase, cAMP-dependent, catalytic, beta ^ 5567</a>                       | 5.707328848 | 1.532029762  | 0.268432011       | 2.891924247 | 1.44863606 |
| 21360 | AGI_HUM1_OLIGO_A_23_P70348  | <a href="#">SERPINB6 ^ Serine (or cysteine) proteinase inhibitor, clade B (ovalbumin), member 6</a>   | 5.694968595 | 1.687333333  | 0.296284923       | 3.220608583 | 1.44863606 |
| 18813 | AGI_HUM1_OLIGO_A_23_P48561  | <a href="#">EFS ^ Embryonal Fyn-associated substrate ^ 10278</a>                                      | 5.692798354 | 2.066666667  | 0.363031771       | 4.189176491 | 1.44863606 |
| 2595  | AGI_HUM1_OLIGO_A_23_P123732 | <a href="#">C9orf103 ^ Chromosome 9 open reading frame 103 ^ 414328</a>                               | 5.684812143 | 1.118333333  | 0.196723006       | 2.170960284 | 1.44863606 |
| 18580 | AGI_HUM1_OLIGO_A_23_P46447  | <a href="#">^ LOC440702 ^ 440702</a>                                                                  | 5.680284357 | 2.871433333  | 0.50550873        | 7.317918424 | 1.44863606 |
| 6006  | AGI_HUM1_OLIGO_A_23_P154745 | <a href="#">CST3 ^ Cystatin C (amyloid angiopathy and cerebral hemorrhage) ^ 1471</a>                 | 5.678211536 | 1.467666667  | 0.258473404       | 2.765742162 | 1.44863606 |
| 424   | AGI_HUM1_OLIGO_A_23_P103503 | <a href="#">MDM4 ^ Mdm4, transformed 3T3 cell double minute 4, p53 binding protein (mouse)</a>        | 5.670779604 | 1.109        | 0.19556394        | 2.156960863 | 1.44863606 |
| 21926 | AGI_HUM1_OLIGO_A_23_P75589  | <a href="#">CRYAB ^ Crystallin, alpha B ^ 1410</a>                                                    | 5.667919532 | 1.71         | 0.301698002       | 3.271608234 | 1.44863606 |
| 14275 | AGI_HUM1_OLIGO_A_23_P34176  | <a href="#">KIAA1280 ^ KIAA1280 protein ^ 55841</a>                                                   | 5.660075136 | 2.175333333  | 0.384329409       | 4.516901124 | 1.44863606 |
| 2478  | AGI_HUM1_OLIGO_A_23_P122615 | <a href="#">C6orf111 ^ Chromosome 6 open reading frame 111 ^ 25957</a>                                | 5.659201636 | 0.945        | 0.166984685       | 1.925188886 | 1.44863606 |
| 2800  | AGI_HUM1_OLIGO_A_23_P12572  | <a href="#">CASP7 ^ Caspase 7, apoptosis-related cysteine protease ^ 840</a>                          | 5.653380922 | 2.916666667  | 0.515915468       | 7.550994501 | 1.44863606 |
| 31107 | AGI_HUM1_OLIGO_A_24_P816384 | <a href="#">FLJ43276 ^ FLJ43276 protein ^ 388165</a>                                                  | 5.647505419 | 0.815666667  | 0.14442955        | 1.760111308 | 1.44863606 |
| 28148 | AGI_HUM1_OLIGO_A_24_P320699 | <a href="#">^ ^</a>                                                                                   | 5.637144917 | 0.787666667  | 0.139727944       | 1.726280216 | 1.44863606 |
| 8167  | AGI_HUM1_OLIGO_A_23_P200203 | <a href="#">FLJ10948 ^ Hypothetical protein FLJ10948 ^ 55268</a>                                      | 5.622219756 | 1.136666667  | 0.202174002       | 2.198724227 | 1.44863606 |
| 39398 | AGI_OLIGO_NM_021105_1_1182  | <a href="#">PLSCR1 ^ Phospholipid scramblase 1 ^ 5359</a>                                             | 5.619023361 | 1.242666667  | 0.221153497       | 2.366355236 | 1.44863606 |
| 5799  | AGI_HUM1_OLIGO_A_23_P153026 | <a href="#">GAA ^ Glucosidase, alpha; acid (Pompe disease, glycogen storage disease type II) ^ 25</a> | 5.612998184 | 1.241        | 0.221093961       | 2.363623094 | 1.44863606 |
| 36025 | AGI_OLIGO_AB020689_2_4960   | <a href="#">KIAA0882 ^ KIAA0882 protein ^ 23158</a>                                                   | 5.603022966 | 3.646        | 0.65072016        | 12.51858851 | 1.44863606 |
| 18398 | AGI_HUM1_OLIGO_A_23_P44674  | <a href="#">CRIP1 ^ Cysteine-rich protein 1 (intestinal) ^ 1396</a>                                   | 5.591487405 | 2.207666667  | 0.394826368       | 4.619275736 | 1.44863606 |
| 5729  | AGI_HUM1_OLIGO_A_23_P152374 | <a href="#">^ ^</a>                                                                                   | 5.586901378 | 1.160537037  | 0.207724633       | 2.35406242  | 1.44863606 |
| 393   | AGI_HUM1_OLIGO_A_23_P103232 | <a href="#">DUSP23 ^ Dual specificity phosphatase 23 ^ 54935</a>                                      | 5.585092188 | 1.073333333  | 0.192178266       | 2.104289696 | 1.44863606 |
| 14015 | AGI_HUM1_OLIGO_A_23_P335695 | <a href="#">KIAA0657 ^ KIAA0657 protein ^ 23363</a>                                                   | 5.581795076 | 2.253666667  | 0.403753029       | 4.768933504 | 1.44863606 |

Supplementary Table S1. SAM between Lung mets and Parental models microarrays

List of Significant Genes for Delta = 1.311: Positive genes (934) and Negative genes (297)

| Row   | Gene ID                     | Gene Name                                                                                              | Score(d)    | Numerator(r) | Denominator(s+s0) | Fold Change | q-value(%) |
|-------|-----------------------------|--------------------------------------------------------------------------------------------------------|-------------|--------------|-------------------|-------------|------------|
| 34310 | AGI_HUM1_OLIGO_A_32_P221479 | <a href="#">^ ^</a>                                                                                    | 5.567946098 | 1.35225      | 0.242863342       | 2.553099918 | 1.44863606 |
| 3463  | AGI_HUM1_OLIGO_A_23_P131695 | <a href="#">UCN ^ Urocortin ^ 7349</a>                                                                 | 5.567063598 | 1.423333333  | 0.255670392       | 2.682044796 | 1.44863606 |
| 6725  | AGI_HUM1_OLIGO_A_23_P161422 | <a href="#">PLXDC2 ^ Plexin domain containing 2 ^ 84898</a>                                            | 5.553717381 | 2.022        | 0.364080464       | 4.061464403 | 1.44863606 |
| 4090  | AGI_HUM1_OLIGO_A_23_P137514 | <a href="#">IVNS1ABP ^ Influenza virus NS1A binding protein ^ 10625</a>                                | 5.552817261 | 1.410666667  | 0.254045217       | 2.658599878 | 1.44863606 |
| 3551  | AGI_HUM1_OLIGO_A_23_P132454 | <a href="#">CCNL1 ^ Cyclin L1 ^ 57018</a>                                                              | 5.538979838 | 1.458        | 0.263225367       | 2.747272467 | 1.44863606 |
| 11786 | AGI_HUM1_OLIGO_A_23_P257924 | <a href="#">ETS2 ^ V-ets erythroblastosis virus E26 oncogene homolog 2 (avian) ^ 2114</a>              | 5.524423542 | 1.558666667  | 0.282141051       | 2.945814665 | 1.44863606 |
| 38488 | AGI_OLIGO_NM_004433_2_2218  | <a href="#">ELF3 ^ E74-like factor 3 (ets domain transcription factor, epithelial-specific) ^ 1999</a> | 5.515593925 | 2.117        | 0.383820859       | 4.337909635 | 1.44863606 |
| 18777 | AGI_HUM1_OLIGO_A_23_P4821   | <a href="#">JUNB ^ Jun B proto-oncogene ^ 3726</a>                                                     | 5.506336383 | 2.636666667  | 0.47884228        | 6.218931243 | 1.44863606 |
| 26375 | AGI_HUM1_OLIGO_A_24_P209455 | <a href="#">GIMAP4 ^ GTPase, IMAP family member 4 ^ 55303</a>                                          | 5.502182469 | 1.327433333  | 0.241255782       | 2.509558076 | 1.44863606 |
| 10122 | AGI_HUM1_OLIGO_A_23_P215891 | <a href="#">RNF19 ^ Ring finger protein 19 ^ 25897</a>                                                 | 5.496776038 | 1.303        | 0.237048043       | 2.46741434  | 1.44863606 |
| 10286 | AGI_HUM1_OLIGO_A_23_P217228 | <a href="#">TRO ^ Trophinin ^ 7216</a>                                                                 | 5.488806523 | 1.36         | 0.247776997       | 2.566851795 | 1.44863606 |
| 33679 | AGI_HUM1_OLIGO_A_32_P179526 | <a href="#">ZBTB20 ^ Zinc finger and BTB domain containing 20 ^ 26137</a>                              | 5.471044447 | 1.888666667  | 0.345211355       | 3.702928433 | 1.44863606 |
| 27832 | AGI_HUM1_OLIGO_A_24_P300777 | <a href="#">ADAM8 ^ A disintegrin and metalloproteinase domain 8 ^ 101</a>                             | 5.459092269 | 2.256333333  | 0.413316578       | 4.777756517 | 1.44863606 |
| 14884 | AGI_HUM1_OLIGO_A_23_P356484 | <a href="#">RPS10 ^ Ribosomal protein S10 ^ 6204</a>                                                   | 5.448501378 | 0.901666667  | 0.165488931       | 1.868222993 | 1.44863606 |
| 24399 | AGI_HUM1_OLIGO_A_23_P98640  | <a href="#">DCHS1 ^ Dachshous 1 (Drosophila) ^ 8642</a>                                                | 5.447793978 | 2.612        | 0.479460128       | 6.113506083 | 1.44863606 |
| 22776 | AGI_HUM1_OLIGO_A_23_P83438  | <a href="#">FLJ13855 ^ Hypothetical protein FLJ13855 ^ 65264</a>                                       | 5.44575967  | 0.95         | 0.174447654       | 1.931872658 | 1.44863606 |
| 33366 | AGI_HUM1_OLIGO_A_32_P156851 | <a href="#">DSCR1L1 ^ Down syndrome critical region gene 1-like 1 ^ 10231</a>                          | 5.445418078 | 2.710666667  | 0.497788531       | 6.546240775 | 1.44863606 |
| 27414 | AGI_HUM1_OLIGO_A_24_P273857 | <a href="#">ZFPM2 ^ Zinc finger protein, multitype 2 ^ 23414</a>                                       | 5.441406971 | 3.100040741  | 0.569713083       | 8.574429833 | 1.86497634 |
| 28626 | AGI_HUM1_OLIGO_A_24_P347431 | <a href="#">FOXA1 ^ Forkhead box A1 ^ 3169</a>                                                         | 5.440914558 | 2.588333333  | 0.475716592       | 6.014035289 | 1.86497634 |
| 8914  | AGI_HUM1_OLIGO_A_23_P206150 | <a href="#">DAPK2 ^ Death-associated protein kinase 2 ^ 23604</a>                                      | 5.420682377 | 1.623666667  | 0.299531785       | 3.081572357 | 1.86497634 |
| 872   | AGI_HUM1_OLIGO_A_23_P10761  | <a href="#">EPS8L2 ^ EPS8-like 2 ^ 64787</a>                                                           | 5.420095933 | 2.28         | 0.420656761       | 4.856779538 | 1.86497634 |
| 17350 | AGI_HUM1_OLIGO_A_23_P41455  | <a href="#">TRPC3 ^ Transient receptor potential cation channel, subfamily C, member 3 ^ 7222</a>      | 5.419323574 | 2.454259259  | 0.452871881       | 5.480316671 | 1.86497634 |
| 1702  | AGI_HUM1_OLIGO_A_23_P115759 | <a href="#">ADAM8 ^ A disintegrin and metalloproteinase domain 8 ^ 101</a>                             | 5.409835392 | 1.556333333  | 0.287685894       | 2.941054122 | 1.86497634 |
| 39120 | AGI_OLIGO_NM_014713_2_1282  | <a href="#">LAPTM4A ^ Lysosomal-associated protein transmembrane 4 alpha ^ 9741</a>                    | 5.400591037 | 0.769        | 0.142391822       | 1.70408819  | 1.86497634 |
| 9287  | AGI_HUM1_OLIGO_A_23_P209146 | <a href="#">ZNF91 ^ Zinc finger protein 91 (HPF7, HTF10) ^ 7644</a>                                    | 5.39917112  | 0.696333333  | 0.128970414       | 1.620381292 | 1.86497634 |
| 37671 | AGI_OLIGO_NM_000729_2_586   | <a href="#">CCK ^ Cholecystokinin ^ 885</a>                                                            | 5.390114504 | 1.507666667  | 0.27970958        | 2.843497758 | 1.86497634 |
| 23732 | AGI_HUM1_OLIGO_A_23_P92490  | <a href="#">DHR56 ^ Dehydrogenase/reductase (SDR family) member 6 ^ 56898</a>                          | 5.385396505 | 2.446        | 0.454191255       | 5.449032139 | 1.86497634 |
| 14310 | AGI_HUM1_OLIGO_A_23_P342869 | <a href="#">^ ^</a>                                                                                    | 5.383939604 | 2.389666667  | 0.443850942       | 5.240362695 | 1.86497634 |
| 31294 | AGI_HUM1_OLIGO_A_24_P868583 | <a href="#">^ ^</a>                                                                                    | 5.358827695 | 2.904        | 0.541909568       | 7.484987983 | 1.86497634 |
| 38719 | AGI_OLIGO_NM_005558_2_2386  | <a href="#">LAD1 ^ Ladinin 1 ^ 3898</a>                                                                | 5.353748385 | 1.919        | 0.358440454       | 3.781608467 | 1.86497634 |
| 11851 | AGI_HUM1_OLIGO_A_23_P258463 | <a href="#">PROM1 ^ Prominin 1 ^ 8842</a>                                                              | 5.347521662 | 1.685592593  | 0.315210054       | 3.216724974 | 1.86497634 |
| 15903 | AGI_HUM1_OLIGO_A_23_P380076 | <a href="#">FLJ35036 ^ Hypothetical protein FLJ35036 ^ 253461</a>                                      | 5.315886754 | 2.197        | 0.413289466       | 4.585248743 | 1.86497634 |
| 23211 | AGI_HUM1_OLIGO_A_23_P87709  | <a href="#">FLJ22662 ^ Hypothetical protein FLJ22662 ^ 79887</a>                                       | 5.303108478 | 2.247333333  | 0.423776661       | 4.748044095 | 1.86497634 |
| 8825  | AGI_HUM1_OLIGO_A_23_P205493 | <a href="#">LRP10 ^ Low density lipoprotein receptor-related protein 10 ^ 26020</a>                    | 5.302795139 | 1.174666667  | 0.221518395       | 2.257407178 | 1.86497634 |
| 3737  | AGI_HUM1_OLIGO_A_23_P134160 | <a href="#">DCDC2 ^ Doublecortin domain containing 2 ^ 51473</a>                                       | 5.302510687 | 2.2306       | 0.420668648       | 4.693291276 | 1.86497634 |
| 22010 | AGI_HUM1_OLIGO_A_23_P76364  | <a href="#">CD9 ^ CD9 antigen (p24) ^ 928</a>                                                          | 5.298914566 | 0.963        | 0.181735332       | 1.949359262 | 1.86497634 |
| 10600 | AGI_HUM1_OLIGO_A_23_P22526  | <a href="#">HEPH ^ Hephaestin ^ 9843</a>                                                               | 5.294056733 | 3.366037037  | 0.635814312       | 10.31046173 | 1.86497634 |
| 37699 | AGI_OLIGO_NM_000873_2_959   | <a href="#">ICAM2 ^ Intercellular adhesion molecule 2 ^ 3384</a>                                       | 5.286303721 | 3.807        | 0.720162934       | 13.99655624 | 1.86497634 |
| 903   | AGI_HUM1_OLIGO_A_23_P107903 | <a href="#">^ ^</a>                                                                                    | 5.286043268 | 1.604333333  | 0.303503633       | 3.040552148 | 1.86497634 |
| 28575 | AGI_HUM1_OLIGO_A_24_P344961 | <a href="#">AMOT ^ Angiomotin ^ 154796</a>                                                             | 5.283952657 | 1.465233333  | 0.277298725       | 2.761081232 | 1.86497634 |
| 17371 | AGI_HUM1_OLIGO_A_23_P415021 | <a href="#">DKFZP586A0522 ^ DKFZP586A0522 protein ^ 25840</a>                                          | 5.280365131 | 1.328        | 0.25149776        | 2.510543983 | 1.86497634 |
| 12173 | AGI_HUM1_OLIGO_A_23_P27315  | <a href="#">EMILIN2 ^ Elastin microfibril interfacer 2 ^ 84034</a>                                     | 5.274737438 | 2.772666667  | 0.525650177       | 6.833698825 | 1.86497634 |
| 23196 | AGI_HUM1_OLIGO_A_23_P87564  | <a href="#">BTG1 ^ B-cell translocation gene 1, anti-proliferative ^ 694</a>                           | 5.268412927 | 1.229333333  | 0.233340353       | 2.344586219 | 1.86497634 |
| 5288  | AGI_HUM1_OLIGO_A_23_P148345 | <a href="#">RNF128 ^ Ring finger protein 128 ^ 79589</a>                                               | 5.264555276 | 2.210333333  | 0.419851862       | 4.627821866 | 1.86497634 |
| 37905 | AGI_OLIGO_NM_001769_2_638   | <a href="#">CD9 ^ CD9 antigen (p24) ^ 928</a>                                                          | 5.262420841 | 0.963666667  | 0.183122311       | 1.950260265 | 1.86497634 |
| 9083  | AGI_HUM1_OLIGO_A_23_P207493 | <a href="#">CROP ^ Cisplatin resistance-associated overexpressed protein ^ 51747</a>                   | 5.250549457 | 1.11         | 0.211406446       | 2.158456473 | 1.91893978 |



Supplementary Table S1. SAM between Lung mets and Parental models microarrays

List of Significant Genes for Delta = 1.311: Positive genes (934) and Negative genes (297)

| Row   | Gene ID                     | Gene Name                                                                                             | Score(d)    | Numerator(r) | Denominator(s+s0) | Fold Change | q-value(%) |
|-------|-----------------------------|-------------------------------------------------------------------------------------------------------|-------------|--------------|-------------------|-------------|------------|
| 23532 | AGI_HUM1_OLIGO_A_23_P90649  | <a href="#">IRS1 ^ Insulin receptor substrate 1 ^ 3667</a>                                            | 5.240446991 | 2.5          | 0.477058542       | 5.656854249 | 1.91893978 |
| 17783 | AGI_HUM1_OLIGO_A_23_P424582 | <a href="#">PPT2 ^ Palmitoyl-protein thioesterase 2 ^ 9374</a>                                        | 5.23935696  | 1.331333333  | 0.25410243        | 2.516351277 | 1.91893978 |
| 7819  | AGI_HUM1_OLIGO_A_23_P17130  | <a href="#">MGC13057 ^ Hypothetical protein MGC13057 ^ 84281</a>                                      | 5.236229009 | 0.799333333  | 0.152654388       | 1.740296753 | 1.91893978 |
| 20401 | AGI_HUM1_OLIGO_A_23_P61371  | <a href="#">LOC340061 ^ Hypothetical protein LOC340061 ^ 340061</a>                                   | 5.226209508 | 1.284        | 0.245684755       | 2.435132037 | 1.91893978 |
| 655   | AGI_HUM1_OLIGO_A_23_P105571 | <a href="#">CHPT1 ^ Choline phosphotransferase 1 ^ 56994</a>                                          | 5.223267468 | 1.076666667  | 0.206128955       | 2.109157259 | 1.91893978 |
| 9953  | AGI_HUM1_OLIGO_A_23_P214501 | <a href="#">HCG12 ^ HLA complex group 12 ^ 493826</a>                                                 | 5.217829947 | 1.255        | 0.240521445       | 2.386671486 | 1.91893978 |
| 17359 | AGI_HUM1_OLIGO_A_23_P41487  | <a href="#">^ ^</a>                                                                                   | 5.210880553 | 3.167        | 0.607766762       | 8.981771377 | 1.91893978 |
| 745   | AGI_HUM1_OLIGO_A_23_P106481 | <a href="#">LOC51234 ^ Hypothetical protein LOC51234 ^ 51234</a>                                      | 5.195962604 | 1.143666667  | 0.220106793       | 2.209418427 | 1.91893978 |
| 14971 | AGI_HUM1_OLIGO_A_23_P358528 | <a href="#">PLA2G4D ^ Phospholipase A2, group IVD (cytosolic) ^ 283748</a>                            | 5.192177289 | 1.0105       | 0.194619703       | 2.014609189 | 1.91893978 |
| 22091 | AGI_HUM1_OLIGO_A_23_P77076  | <a href="#">SPPL2A ^ Putative intramembrane cleaving protease ^ 84888</a>                             | 5.189690938 | 1.084        | 0.208875637       | 2.119905567 | 1.91893978 |
| 22296 | AGI_HUM1_OLIGO_A_23_P78867  | <a href="#">RYR1 ^ Ryanodine receptor 1 (skeletal) ^ 6261</a>                                         | 5.179754461 | 2.754041667  | 0.531693478       | 6.746043713 | 1.91893978 |
| 14215 | AGI_HUM1_OLIGO_A_23_P340333 | <a href="#">KIAA1754 ^ KIAA1754 ^ 85450</a>                                                           | 5.177277461 | 2.514333333  | 0.485647785       | 5.713335827 | 1.91893978 |
| 31155 | AGI_HUM1_OLIGO_A_24_P82880  | <a href="#">TPM4 ^ Tropomyosin 4 ^ 7171</a>                                                           | 5.170143966 | 1.018666667  | 0.197028685       | 2.02604563  | 1.91893978 |
| 13089 | AGI_HUM1_OLIGO_A_23_P31399  | <a href="#">PON2 ^ Paraoxonase 2 ^ 5445</a>                                                           | 5.162169944 | 0.826666667  | 0.160139375       | 1.773582778 | 1.91893978 |
| 18023 | AGI_HUM1_OLIGO_A_23_P43019  | <a href="#">Shax3 ^ Snf7 homologue associated with Alix 3 ^ 92421</a>                                 | 5.153019816 | 2.342333333  | 0.454555468       | 5.071221654 | 1.91893978 |
| 22043 | AGI_HUM1_OLIGO_A_23_P76659  | <a href="#">CG018 ^ Hypothetical gene CG018 ^ 90634</a>                                               | 5.145305989 | 2.185703704  | 0.42479567        | 4.549486456 | 1.91893978 |
| 10461 | AGI_HUM1_OLIGO_A_23_P21862  | <a href="#">^ ^</a>                                                                                   | 5.133662558 | 1.364666667  | 0.265827107       | 2.5751682   | 1.91893978 |
| 31124 | AGI_HUM1_OLIGO_A_24_P820037 | <a href="#">^ ^</a>                                                                                   | 5.13308017  | 1.837715344  | 0.358014152       | 3.574435313 | 1.91893978 |
| 3062  | AGI_HUM1_OLIGO_A_23_P128174 | <a href="#">RAB3IP ^ RAB3A interacting protein (rab3in) ^ 117177</a>                                  | 5.131314975 | 1.436666667  | 0.279980214       | 2.706947048 | 1.91893978 |
| 34286 | AGI_HUM1_OLIGO_A_32_P21993  | <a href="#">TPM4 ^ Tropomyosin 4 ^ 7171</a>                                                           | 5.126083428 | 2.259333333  | 0.440752353       | 4.787701919 | 1.91893978 |
| 7143  | AGI_HUM1_OLIGO_A_23_P165102 | <a href="#">FUT3 ^ Fucosyltransferase 3 (galactoside 3(4)-L-fucosyltransferase, Lewis blood group</a> | 5.121943078 | 0.879555556  | 0.171723024       | 1.839808433 | 1.91893978 |
| 13002 | AGI_HUM1_OLIGO_A_23_P312150 | <a href="#">EDN2 ^ Endothelin 2 ^ 1907</a>                                                            | 5.117041095 | 2.222        | 0.434235324       | 4.665397479 | 1.91893978 |
| 21329 | AGI_HUM1_OLIGO_A_23_P70060  | <a href="#">PPAP2A ^ Phosphatidic acid phosphatase type 2A ^ 8611</a>                                 | 5.13308017  | 1.491        | 0.292661967       | 2.8108374   | 1.91893978 |
| 5250  | AGI_HUM1_OLIGO_A_23_P147918 | <a href="#">S100A16 ^ S100 calcium binding protein A16 ^ 140576</a>                                   | 5.094139054 | 2.080333333  | 0.408377807       | 4.229049167 | 1.91893978 |
| 5192  | AGI_HUM1_OLIGO_A_23_P147431 | <a href="#">LYN ^ V-yes-1 Yamaguchi sarcoma viral related oncogene homolog ^ 4067</a>                 | 5.09205987  | 1.433666667  | 0.281549452       | 2.701323959 | 1.91893978 |
| 15432 | AGI_HUM1_OLIGO_A_23_P369298 | <a href="#">PERP ^ PERP, TP53 apoptosis effector ^ 64065</a>                                          | 5.08966594  | 1.973        | 0.387648231       | 3.925836255 | 1.91893978 |
| 23849 | AGI_HUM1_OLIGO_A_23_P93562  | <a href="#">SESN1 ^ Sestrin 1 ^ 27244</a>                                                             | 5.088156445 | 0.888        | 0.174522936       | 1.850608856 | 1.91893978 |
| 19576 | AGI_HUM1_OLIGO_A_23_P54029  | <a href="#">SLC22A17 ^ Solute carrier family 22 (organic cation transporter), member 17 ^ 51310</a>   | 5.070495243 | 1.492666667  | 0.294382816       | 2.814086483 | 1.94939914 |
| 15213 | AGI_HUM1_OLIGO_A_23_P363966 | <a href="#">C1RL ^ Complement component 1, r subcomponent-like ^ 51279</a>                            | 5.062825248 | 1.621666667  | 0.320308639       | 3.07730335  | 1.94939914 |
| 36808 | AGI_OLIGO_AW753676_1_569    | <a href="#">ZBTB10 ^ Zinc finger and BTB domain containing 10 ^ 65986</a>                             | 5.055752493 | 1.835516667  | 0.363055088       | 3.568991998 | 1.94939914 |
| 7565  | AGI_HUM1_OLIGO_A_23_P168828 | <a href="#">KLF10 ^ Kruppel-like factor 10 ^ 7071</a>                                                 | 5.055696177 | 1.783666667  | 0.352803374       | 3.443001159 | 1.94939914 |
| 24964 | AGI_HUM1_OLIGO_A_24_P123601 | <a href="#">DDR1 ^ Discoidin domain receptor family, member 1 ^ 780</a>                               | 5.051494497 | 1.386666667  | 0.274506221       | 2.614738494 | 1.94939914 |
| 38044 | AGI_OLIGO_NM_002229_1_1653  | <a href="#">JUNB ^ Jun B proto-oncogene ^ 3726</a>                                                    | 5.047256746 | 2.143333333  | 0.424653122       | 4.417816003 | 1.94939914 |
| 20643 | AGI_HUM1_OLIGO_A_23_P63736  | <a href="#">MGC16291 ^ Hypothetical protein MGC16291 ^ 84856</a>                                      | 5.041168475 | 2.752        | 0.545905183       | 6.736503629 | 1.94939914 |
| 12068 | AGI_HUM1_OLIGO_A_23_P26503  | <a href="#">^ ^</a>                                                                                   | 5.033335057 | 1.603666667  | 0.318609162       | 3.03914744  | 1.94939914 |
| 37293 | AGI_OLIGO_NKI_CONTIG753_RC  | <a href="#">CACNA1D ^ Calcium channel, voltage-dependent, L type, alpha 1D subunit ^ 776</a>          | 5.02974211  | 0.953333333  | 0.189539207       | 1.936341392 | 1.94939914 |
| 15667 | AGI_HUM1_OLIGO_A_23_P37441  | <a href="#">B2M ^ Beta-2-microglobulin ^ 567</a>                                                      | 5.028798099 | 1.696666667  | 0.337390095       | 3.241511445 | 1.94939914 |
| 10363 | AGI_HUM1_OLIGO_A_23_P217866 | <a href="#">IFI16 ^ Interferon, gamma-inducible protein 16 ^ 3428</a>                                 | 5.027366119 | 4.748333333  | 0.944497222       | 26.87761711 | 1.94939914 |
| 35720 | AGI_HUM1_OLIGO_A_23_P85999  | <a href="#">CDH13 ^ Cadherin 13, H-cadherin (heart) ^ 1012</a>                                        | 5.017052052 | 1.223        | 0.243768649       | 2.334316204 | 1.94939914 |
| 31412 | AGI_HUM1_OLIGO_A_24_P910490 | <a href="#">^ ^</a>                                                                                   | 5.008063317 | 1.239666667  | 0.247534144       | 2.361439651 | 1.94939914 |
| 24372 | AGI_HUM1_OLIGO_A_23_P98402  | <a href="#">^ ^</a>                                                                                   | 4.987274811 | 1.031333333  | 0.206792963       | 2.043912355 | 1.94939914 |
| 32627 | AGI_HUM1_OLIGO_A_32_P104746 | <a href="#">ZFYVE28 ^ Zinc finger, FYVE domain containing 28 ^ 57732</a>                              | 4.965046278 | 1.220333333  | 0.245784886       | 2.330005456 | 1.94939914 |
| 39718 | AGI_OLIGO_NM_145809_1_3648  | <a href="#">^ ^</a>                                                                                   | 4.962229464 | 1.185        | 0.238803951       | 2.273633946 | 1.94939914 |
| 8764  | AGI_HUM1_OLIGO_A_23_P20502  | <a href="#">SLC39A4 ^ Solute carrier family 39 (zinc transporter), member 4 ^ 55630</a>               | 4.954106919 | 0.896666667  | 0.180994613       | 1.861759432 | 1.94939914 |
| 1388  | AGI_HUM1_OLIGO_A_23_P112554 | <a href="#">COL15A1 ^ Collagen, type XV, alpha 1 ^ 1306</a>                                           | 4.945048146 | 2.143333333  | 0.433430226       | 4.417816003 | 1.94939914 |
| 24199 | AGI_HUM1_OLIGO_A_23_P96931  | <a href="#">C1orf26 ^ Chromosome 1 open reading frame 26 ^ 54823</a>                                  | 4.942234814 | 1.340666667  | 0.271267294       | 2.532683266 | 1.94939914 |

Supplementary Table S1. SAM between Lung mets and Parental models microarrays

List of Significant Genes for Delta = 1.311: Positive genes (934) and Negative genes (297)

| Row   | Gene ID                      | Gene Name                                                                                            | Score(d)    | Numerator(r) | Denominator(s+s0) | Fold Change | q-value(%) |
|-------|------------------------------|------------------------------------------------------------------------------------------------------|-------------|--------------|-------------------|-------------|------------|
| 26351 | AGI_HUM1_OLIGO_A_24_P208567  | <a href="#">IL18R1 ^ Interleukin 18 receptor 1 ^ 8809</a>                                            | 4.942165028 | 1.133725     | 0.229398451       | 2.194245578 | 1.94939914 |
| 27612 | AGI_HUM1_OLIGO_A_24_P286898  | <a href="#">^ ^</a>                                                                                  | 4.939135001 | 0.770333333  | 0.155965231       | 1.70566383  | 1.94939914 |
| 26819 | AGI_HUM1_OLIGO_A_24_P236437  | <a href="#">DNCL12 ^ Dynein, cytoplasmic, light intermediate polypeptide 2 ^ 1783</a>                | 4.937842311 | 0.733        | 0.148445405       | 1.662091723 | 1.94939914 |
| 2382  | AGI_HUM1_OLIGO_A_23_P121716  | <a href="#">ANXA3 ^ Annexin A3 ^ 306</a>                                                             | 4.936744236 | 2.391        | 0.484327299       | 5.245208057 | 1.94939914 |
| 16334 | AGI_HUM1_OLIGO_A_23_P390172  | <a href="#">RNASEL ^ Ribonuclease L (2',5'-oligoadenylate synthetase-dependent) ^ 6041</a>           | 4.929290906 | 2.809333333  | 0.569926463       | 7.009605896 | 1.94939914 |
| 31733 | AGI_HUM1_OLIGO_A_24_P921366  | <a href="#">CALD1 ^ Caldesmon 1 ^ 800</a>                                                            | 4.922419185 | 1.919666667  | 0.389984395       | 3.783356345 | 1.94939914 |
| 38059 | AGI_OLIGO_NM_002293_2_7752   | <a href="#">LAMC1 ^ Laminin, gamma 1 (formerly LAMB2) ^ 3915</a>                                     | 4.905538565 | 1.739333333  | 0.354565214       | 3.338808464 | 1.94939914 |
| 9819  | AGI_HUM1_OLIGO_A_23_P213375  | <a href="#">PCDH82 ^ Protocadherin beta 2 ^ 56133</a>                                                | 4.903720749 | 1.633333333  | 0.333080413       | 3.102289524 | 1.94939914 |
| 26383 | AGI_HUM1_OLIGO_A_24_P210399  | <a href="#">TM9SF2 ^ Transmembrane 9 superfamily member 2 ^ 9375</a>                                 | 4.890369005 | 0.684666667  | 0.140003068       | 1.607330566 | 2.27941553 |
| 425   | AGI_HUM1_OLIGO_A_23_P103511  | <a href="#">^ ^</a>                                                                                  | 4.884514553 | 1.646666667  | 0.33711982        | 3.131093665 | 2.27941553 |
| 11142 | AGI_HUM1_OLIGO_A_23_P25224   | <a href="#">CSDA ^ Cold shock domain protein A ^ 8531</a>                                            | 4.876390769 | 2.997666667  | 0.614730609       | 7.98707171  | 2.27941553 |
| 39005 | AGI_OLIGO_NM_012317_2_1012   | <a href="#">LDOC1 ^ Leucine zipper, down-regulated in cancer 1 ^ 23641</a>                           | 4.875681661 | 1.793208333  | 0.36778618        | 3.465847878 | 2.27941553 |
| 36934 | AGI_OLIGO_BC034048_1_3545    | <a href="#">SCAMP1 ^ Secretory carrier membrane protein 1 ^ 9522</a>                                 | 4.854987514 | 0.646666667  | 0.13319636        | 1.565546833 | 2.27941553 |
| 24017 | AGI_HUM1_OLIGO_A_23_P9513    | <a href="#">MTA1 ^ Metastasis associated 1 ^ 9112</a>                                                | 4.850093949 | 0.803333333  | 0.16563253        | 1.745128575 | 2.27941553 |
| 29080 | AGI_HUM1_OLIGO_A_24_P376483  | <a href="#">HLA-A ^ Major histocompatibility complex, class I, A ^ 3105</a>                          | 4.845008142 | 2.317        | 0.478224171       | 4.982949662 | 2.27941553 |
| 20748 | AGI_HUM1_OLIGO_A_23_P64743   | <a href="#">STK38L ^ Serine/threonine kinase 38 like ^ 23012</a>                                     | 4.842750219 | 1.222333333  | 0.252404786       | 2.33323777  | 2.27941553 |
| 36734 | AGI_OLIGO_AL832814_1_2402    | <a href="#">MGC19764 ^ Hypothetical protein MGC19764 ^ 162394</a>                                    | 4.842737814 | 0.777666667  | 0.160584094       | 1.714355927 | 2.27941553 |
| 5782  | AGI_HUM1_OLIGO_A_23_P152876  | <a href="#">RAB34 ^ RAB34, member RAS oncogene family ^ 83871</a>                                    | 4.835889417 | 2.543333333  | 0.525928762       | 5.829343164 | 2.27941553 |
| 38094 | AGI_OLIGO_NM_002444_1_3597   | <a href="#">MSN ^ Moesin ^ 4478</a>                                                                  | 4.83417617  | 1.599        | 0.330769907       | 3.029332632 | 2.27941553 |
| 23281 | AGI_HUM1_OLIGO_A_23_P88347   | <a href="#">PLEKHC1 ^ Pleckstrin homology domain containing, family C (with FERM domain) me</a>      | 4.832878042 | 1.788666667  | 0.370103829       | 3.454954393 | 2.27941553 |
| 38734 | AGI_OLIGO_NM_005620_1_174    | <a href="#">S100A11 ^ S100 calcium binding protein A11 (calgizzarin) ^ 6282</a>                      | 4.831375971 | 1.407333333  | 0.291290378       | 2.652464299 | 2.27941553 |
| 1242  | AGI_HUM1_OLIGO_A_23_P111112  | <a href="#">VARS2L ^ Valyl-tRNA synthetase 2-like ^ 57176</a>                                        | 4.828982985 | 0.953        | 0.197350043       | 1.935894054 | 2.27941553 |
| 38796 | AGI_OLIGO_NM_006113_3_4663   | <a href="#">VAV3 ^ Vav 3 oncogene ^ 10451</a>                                                        | 4.828872087 | 2.464333333  | 0.510333115       | 5.518718635 | 2.27941553 |
| 26020 | AGI_HUM1_OLIGO_A_24_P187921  | <a href="#">MANEA ^ Mannosidase, endo-alpha ^ 79694</a>                                              | 4.827044957 | 1.191844444  | 0.246909746       | 2.284446165 | 2.27941553 |
| 33760 | AGI_HUM1_OLIGO_A_32_P184937  | <a href="#">MGC4677 ^ Hypothetical protein MGC4677 ^ 112597</a>                                      | 4.82336005  | 1.522666667  | 0.315685881       | 2.873216422 | 2.27941553 |
| 6341  | AGI_HUM1_OLIGO_A_23_P157679  | <a href="#">MGC14595 ^ Hypothetical protein MGC14595 ^ 84294</a>                                     | 4.817744629 | 0.807        | 0.167505765       | 1.74956953  | 2.27941553 |
| 4038  | AGI_HUM1_OLIGO_A_23_P137016  | <a href="#">SAT ^ Spermidine/spermine N1-acetyltransferase ^ 6303</a>                                | 4.817486255 | 2.272333333  | 0.471684446       | 4.831038444 | 2.27941553 |
| 16410 | AGI_HUM1_OLIGO_A_23_P391778  | <a href="#">MACF1 ^ Microtubule-actin crosslinking factor 1 ^ 23499</a>                              | 4.799467926 | 0.632333333  | 0.131750716       | 1.550069963 | 2.27941553 |
| 23667 | AGI_HUM1_OLIGO_A_23_P91910   | <a href="#">PLSCR4 ^ Phospholipid scramblase 4 ^ 57088</a>                                           | 4.795868673 | 2.501333333  | 0.521560014       | 5.66208471  | 2.27941553 |
| 37279 | AGI_OLIGO_NKI_CONTIG55188_RC | <a href="#">RHBDL6 ^ Rhomboid, veinlet-like 6 (Drosophila) ^ 79651</a>                               | 4.785802924 | 1.026666667  | 0.21452339        | 2.03731162  | 2.27941553 |
| 12607 | AGI_HUM1_OLIGO_A_23_P30283   | <a href="#">UNQ1912 ^ HGS_RE408 ^ 345757</a>                                                         | 4.782737969 | 0.726666667  | 0.151935287       | 1.654811245 | 2.27941553 |
| 37525 | AGI_OLIGO_NM_000237_1_3459   | <a href="#">LPL ^ Lipoprotein lipase ^ 4023</a>                                                      | 4.78264712  | 2.499375     | 0.522592392       | 5.654404135 | 2.27941553 |
| 36246 | AGI_OLIGO_AK001536_1_2389    | <a href="#">^ CDNA FLJ10674 fis, clone NT2RP2006436 ^</a>                                            | 4.782106507 | 1.237333333  | 0.25874232        | 2.357623479 | 2.27941553 |
| 23107 | AGI_HUM1_OLIGO_A_23_P86726   | <a href="#">PPYR1 ^ Pancreatic polypeptide receptor 1 ^ 5540</a>                                     | 4.774731572 | 0.971        | 0.203362217       | 1.960198831 | 2.27941553 |
| 5249  | AGI_HUM1_OLIGO_A_23_P147914  | <a href="#">S100A16 ^ S100 calcium binding protein A16 ^ 140576</a>                                  | 4.771785941 | 2.566666667  | 0.537883865       | 5.924390209 | 2.27941553 |
| 14817 | AGI_HUM1_OLIGO_A_23_P354894  | <a href="#">ZNF567 ^ Zinc finger protein 567 ^ 163081</a>                                            | 4.761396001 | 0.885666667  | 0.186009873       | 1.847618205 | 2.27941553 |
| 19607 | AGI_HUM1_OLIGO_A_23_P54283   | <a href="#">CRI1 ^ CREBBP/EP300 inhibitor 1 ^ 23741</a>                                              | 4.757994485 | 1.030666667  | 0.216617878       | 2.042968085 | 2.27941553 |
| 13436 | AGI_HUM1_OLIGO_A_23_P3215    | <a href="#">MDS009 ^ X 009 protein ^ 56986</a>                                                       | 4.754219559 | 0.713666667  | 0.150112265       | 1.639966866 | 2.27941553 |
| 489   | AGI_HUM1_OLIGO_A_23_P104054  | <a href="#">C1orf9 ^ Chromosome 1 open reading frame 9 ^ 51430</a>                                   | 4.751114462 | 0.889        | 0.187113993       | 1.851892045 | 2.27941553 |
| 23053 | AGI_HUM1_OLIGO_A_23_P86252   | <a href="#">PIGC ^ Phosphatidylinositol glycan, class C ^ 5279</a>                                   | 4.743023913 | 0.920333333  | 0.194039362       | 1.892552515 | 2.27941553 |
| 7895  | AGI_HUM1_OLIGO_A_23_P17663   | <a href="#">MX1 ^ Myxovirus (influenza virus) resistance 1, interferon-inducible protein p78 (mo</a> | 4.736489158 | 1.565333333  | 0.330483884       | 2.95945872  | 2.5946228  |
| 38101 | AGI_OLIGO_NM_002462_2_2647   | <a href="#">MX1 ^ Myxovirus (influenza virus) resistance 1, interferon-inducible protein p78 (mo</a> | 4.736430116 | 1.201333333  | 0.253636875       | 2.299520937 | 2.5946228  |
| 36852 | AGI_OLIGO_BC010607_1_2539    | <a href="#">IGF1R ^ Insulin-like growth factor 1 receptor ^ 3480</a>                                 | 4.73546526  | 0.849333333  | 0.179355837       | 1.801668185 | 2.5946228  |
| 14852 | AGI_HUM1_OLIGO_A_23_P35564   | <a href="#">SEC31L2 ^ SEC31-like 2 (S. cerevisiae) ^ 25956</a>                                       | 4.727793304 | 1.043333333  | 0.220680826       | 2.060984041 | 2.5946228  |
| 12384 | AGI_HUM1_OLIGO_A_23_P29185   | <a href="#">KIAA1043 ^ KIAA1043 protein ^ 23331</a>                                                  | 4.723792223 | 1.026        | 0.217198376       | 2.0363704   | 2.5946228  |
| 21200 | AGI_HUM1_OLIGO_A_23_P68868   | <a href="#">^ ^</a>                                                                                  | 4.72274462  | 0.627        | 0.132761784       | 1.544350266 | 2.5946228  |

Supplementary Table S1. SAM between Lung mets and Parental models microarrays

List of Significant Genes for Delta = 1.311: **Positive genes (934)** and **Negative genes (297)**

| Row   | Gene ID                     | Gene Name                                                                                            | Score(d)    | Numerator(r) | Denominator(s+s0) | Fold Change | q-value(%) |
|-------|-----------------------------|------------------------------------------------------------------------------------------------------|-------------|--------------|-------------------|-------------|------------|
| 28550 | AGI_HUM1_OLIGO_A_24_P343233 | <a href="#">HLA-DRB1 ^ Major histocompatibility complex, class II, DR beta 4 ^ 3123</a>              | 4.707165719 | 2.541333333  | 0.539886098       | 5.821267578 | 2.5946228  |
| 8670  | AGI_HUM1_OLIGO_A_23_P204286 | <a href="#">MGP ^ Matrix Gla protein ^ 4256</a>                                                      | 4.706047238 | 2.335        | 0.496170115       | 5.045509635 | 2.5946228  |
| 24282 | AGI_HUM1_OLIGO_A_23_P97623  | <a href="#">RRAGC ^ Ras-related GTP binding C ^ 64121</a>                                            | 4.702157592 | 1.041333333  | 0.22145862        | 2.05812889  | 2.5946228  |
| 34545 | AGI_HUM1_OLIGO_A_32_P24125  | <a href="#">FLJ32926 ^ Hypothetical protein FLJ32926 ^ 93233</a>                                     | 4.701175136 | 0.973483333  | 0.207072339       | 1.963575857 | 2.5946228  |
| 2385  | AGI_HUM1_OLIGO_A_23_P121772 | <a href="#">FRG1 ^ FSHD region gene 1 ^ 2483</a>                                                     | 4.70041029  | 1.158        | 0.246361472       | 2.231478645 | 2.5946228  |
| 34040 | AGI_HUM1_OLIGO_A_32_P203786 | <a href="#">^ ^</a>                                                                                  | 4.698305999 | 3.071        | 0.653639844       | 8.403556352 | 2.5946228  |
| 36575 | AGI_OLIGO_AK097956_1_1063   | <a href="#">LOC286144 ^ Hypothetical protein LOC286144 ^ 286144</a>                                  | 4.697187367 | 1.151666667  | 0.245182186       | 2.221704075 | 2.5946228  |
| 15641 | AGI_HUM1_OLIGO_A_23_P373819 | <a href="#">TUSC1 ^ Tumor suppressor candidate 1 ^ 286319</a>                                        | 4.688124588 | 2.503        | 0.533902193       | 5.668629586 | 2.5946228  |
| 8441  | AGI_HUM1_OLIGO_A_23_P202435 | <a href="#">ADD3 ^ Adducin 3 (gamma) ^ 120</a>                                                       | 4.683819123 | 1.781        | 0.380245256       | 3.43664302  | 2.5946228  |
| 15665 | AGI_HUM1_OLIGO_A_23_P37435  | <a href="#">B2M ^ Beta-2-microglobulin ^ 567</a>                                                     | 4.675264203 | 1.909333333  | 0.408390467       | 3.756354791 | 2.5946228  |
| 30768 | AGI_HUM1_OLIGO_A_24_P712350 | <a href="#">CHML ^ Choroideremia-like (Rab escort protein 2) ^ 1122</a>                              | 4.667907668 | 0.909        | 0.194733929       | 1.877743495 | 2.5946228  |
| 37211 | AGI_OLIGO_NKI_AF161553      | <a href="#">IVNS1ABP ^ Influenza virus NS1A binding protein ^ 10625</a>                              | 4.65962082  | 1.176666667  | 0.252524124       | 2.260538779 | 2.5946228  |
| 4428  | AGI_HUM1_OLIGO_A_23_P140646 | <a href="#">CYFIP1 ^ Cytoplasmic FMR1 interacting protein 1 ^ 23191</a>                              | 4.657199943 | 0.765333333  | 0.164333364       | 1.699762681 | 2.5946228  |
| 25017 | AGI_HUM1_OLIGO_A_24_P12626  | <a href="#">CAV1 ^ Caveolin 1, caveolae protein, 22kDa ^ 857</a>                                     | 4.656574307 | 0.670666667  | 0.144025763       | 1.591808369 | 2.5946228  |
| 2178  | AGI_HUM1_OLIGO_A_23_P120048 | <a href="#">BAZ2B ^ Bromodomain adjacent to zinc finger domain, 2B ^ 29994</a>                       | 4.640288109 | 0.871        | 0.187703862       | 1.828930179 | 2.5946228  |
| 5611  | AGI_HUM1_OLIGO_A_23_P151394 | <a href="#">TM9SF2 ^ Transmembrane 9 superfamily member 2 ^ 9375</a>                                 | 4.638179016 | 0.753333333  | 0.162420064       | 1.68568309  | 2.5946228  |
| 23052 | AGI_HUM1_OLIGO_A_23_P86250  | <a href="#">PIGC ^ Phosphatidylinositol glycan, class C ^ 5279</a>                                   | 4.637634211 | 1.170333333  | 0.25235568        | 2.250636917 | 2.5946228  |
| 8823  | AGI_HUM1_OLIGO_A_23_P205489 | <a href="#">SLC7A8 ^ Solute carrier family 7 (cationic amino acid transporter, y+ system), membe</a> | 4.636065211 | 1.332        | 0.287312611       | 2.517514347 | 2.5946228  |
| 38778 | AGI_OLIGO_NM_005962_2_2342  | <a href="#">MXI1 ^ MAX interactor 1 ^ 4601</a>                                                       | 4.635297572 | 0.998666667  | 0.215448232       | 1.998152461 | 2.5946228  |
| 9077  | AGI_HUM1_OLIGO_A_23_P207445 | <a href="#">MAP2K6 ^ Mitogen-activated protein kinase kinase 6 ^ 5608</a>                            | 4.634441905 | 1.770333333  | 0.381994935       | 3.41132766  | 2.5946228  |
| 32535 | AGI_HUM1_OLIGO_A_24_P98263  | <a href="#">EBAG9 ^ Estrogen receptor binding site associated, antigen, 9 ^ 9166</a>                 | 4.628725132 | 0.760333333  | 0.164264093       | 1.693881949 | 2.5946228  |
| 2455  | AGI_HUM1_OLIGO_A_23_P122439 | <a href="#">BTN2A2 ^ Butyrophilin, subfamily 2, member A2 ^ 10385</a>                                | 4.624404991 | 1.266666667  | 0.273909112       | 2.406050072 | 2.5946228  |
| 7972  | AGI_HUM1_OLIGO_A_23_P18372  | <a href="#">B3GNT5 ^ UDP-GlcNAc:betaGal beta-1,3-N-acetylglucosaminyltransferase 5 ^ 84002</a>       | 4.620288851 | 2.24         | 0.484818173       | 4.723970646 | 2.5946228  |
| 2828  | AGI_HUM1_OLIGO_A_23_P126037 | <a href="#">RLF ^ Rearranged L-myc fusion sequence ^ 6018</a>                                        | 4.615311242 | 0.764        | 0.165535965       | 1.698192493 | 2.5946228  |
| 39414 | AGI_OLIGO_NM_021572_2_2378  | <a href="#">ENPP5 ^ Ectonucleotide pyrophosphatase/phosphodiesterase 5 (putative function) ^</a>     | 4.612952306 | 1.581        | 0.342730619       | 2.991771517 | 2.5946228  |
| 8445  | AGI_HUM1_OLIGO_A_23_P202474 | <a href="#">BCCIP ^ BRCA2 and CDKN1A interacting protein ^ 56647</a>                                 | 4.607332717 | 0.93         | 0.201852147       | 1.905275996 | 2.5946228  |
| 807   | AGI_HUM1_OLIGO_A_23_P107051 | <a href="#">TCAP ^ Titin-cap (teletonin) ^ 8557</a>                                                  | 4.600028751 | 0.74         | 0.16086856        | 1.670175839 | 2.5946228  |
| 6249  | AGI_HUM1_OLIGO_A_23_P156852 | <a href="#">PECI ^ Peroxisomal D3,D2-enoyl-CoA isomerase ^ 10455</a>                                 | 4.595033883 | 2.98         | 0.64852623        | 7.889861636 | 2.5946228  |
| 6224  | AGI_HUM1_OLIGO_A_23_P156645 | <a href="#">HLA-G ^ HLA-G histocompatibility antigen, class I, G ^ 3135</a>                          | 4.583111413 | 2.505        | 0.546571919       | 5.676493425 | 2.5946228  |
| 20663 | AGI_HUM1_OLIGO_A_23_P63929  | <a href="#">WDR11 ^ WD repeat domain 11 ^ 55717</a>                                                  | 4.580050007 | 0.751        | 0.163972009       | 1.682958965 | 2.5946228  |
| 38000 | AGI_OLIGO_NM_002064_1_1177  | <a href="#">GLRX ^ Glutaredoxin (thioltransferase) ^ 2745</a>                                        | 4.578365917 | 0.882666667  | 0.192790765       | 1.843780183 | 2.5946228  |
| 18716 | AGI_HUM1_OLIGO_A_23_P47685  | <a href="#">TRIM21 ^ Tripartite motif-containing 21 ^ 6737</a>                                       | 4.576792853 | 1.979333333  | 0.432471689       | 3.943108294 | 2.5946228  |
| 34019 | AGI_HUM1_OLIGO_A_32_P202502 | <a href="#">EFHA2 ^ EF hand domain family, member A2 ^ 286097</a>                                    | 4.572335581 | 1.912333333  | 0.418239934       | 3.764174038 | 2.68768222 |
| 15049 | AGI_HUM1_OLIGO_A_23_P3602   | <a href="#">^ ^</a>                                                                                  | 4.561838398 | 1.793333333  | 0.393116366       | 3.466148183 | 2.68768222 |
| 6841  | AGI_HUM1_OLIGO_A_23_P162425 | <a href="#">CGI-141 ^ CGI-141 protein ^ 51026</a>                                                    | 4.55785328  | 0.728266667  | 0.159782824       | 1.656647508 | 2.68768222 |
| 21481 | AGI_HUM1_OLIGO_A_23_P71415  | <a href="#">FLJ10204 ^ Hypothetical protein FLJ10204 ^ 55093</a>                                     | 4.557710767 | 0.757666667  | 0.166238427       | 1.690753883 | 2.68768222 |
| 21716 | AGI_HUM1_OLIGO_A_23_P73589  | <a href="#">MSN ^ Moesin ^ 4478</a>                                                                  | 4.554976117 | 3.039333333  | 0.667255602       | 8.221110776 | 2.68768222 |
| 27348 | AGI_HUM1_OLIGO_A_24_P270460 | <a href="#">IFI27 ^ Interferon, alpha-inducible protein 27 ^ 3429</a>                                | 4.550699738 | 2.917        | 0.641000323       | 7.552739353 | 2.68768222 |
| 8069  | AGI_HUM1_OLIGO_A_23_P19322  | <a href="#">C6orf64 ^ Chromosome 6 open reading frame 64 ^ 55776</a>                                 | 4.540516961 | 1.062666667  | 0.234040898       | 2.088788857 | 2.68768222 |
| 11754 | AGI_HUM1_OLIGO_A_23_P257649 | <a href="#">RBP1 ^ Retinol binding protein 1, cellular ^ 5947</a>                                    | 4.540116865 | 2.261333333  | 0.498078221       | 4.794343686 | 2.68768222 |
| 3552  | AGI_HUM1_OLIGO_A_23_P132456 | <a href="#">CCNL1 ^ Cyclin L1 ^ 57018</a>                                                            | 4.539715209 | 1.166666667  | 0.256991158       | 2.244924097 | 2.68768222 |
| 2953  | AGI_HUM1_OLIGO_A_23_P127220 | <a href="#">DNAJC12 ^ DnaJ (Hsp40) homolog, subfamily C, member 12 ^ 56521</a>                       | 4.538501633 | 4.164666667  | 0.917630311       | 17.93451302 | 2.68768222 |
| 12843 | AGI_HUM1_OLIGO_A_23_P30848  | <a href="#">HLA-E ^ Major histocompatibility complex, class I, E ^ 3133</a>                          | 4.531880049 | 2.102666667  | 0.463972268       | 4.29502541  | 2.68768222 |
| 14285 | AGI_HUM1_OLIGO_A_23_P342091 | <a href="#">C6orf130 ^ Chromosome 6 open reading frame 130 ^ 221443</a>                              | 4.517559887 | 1.009666667  | 0.223498236       | 2.013445842 | 2.68768222 |
| 34968 | AGI_HUM1_OLIGO_A_32_P43050  | <a href="#">FRG1 ^ FSHD region gene 1 ^ 2483</a>                                                     | 4.51120055  | 0.897333333  | 0.198912312       | 1.862619947 | 2.68768222 |
| 38250 | AGI_OLIGO_NM_003186_2_970   | <a href="#">TAGLN ^ Transgelin ^ 6876</a>                                                            | 4.507563085 | 1.132        | 0.251133479       | 2.191623533 | 2.68768222 |



Supplementary Table S1. SAM between Lung mets and Parental models microarrays

List of Significant Genes for Delta = 1.311: Positive genes (934) and Negative genes (297)

| Row   | Gene ID                     | Gene Name                                                                                            | Score(d)    | Numerator(r) | Denominator(s+s0) | Fold Change | q-value(%) |
|-------|-----------------------------|------------------------------------------------------------------------------------------------------|-------------|--------------|-------------------|-------------|------------|
| 7820  | AGI_HUM1_OLIGO_A_23_P171310 | <a href="#">FUNDC2 ^ FUN14 domain containing 2 ^ 65991</a>                                           | 4.504898484 | 0.593666667  | 0.131782474       | 1.509077257 | 2.68768222 |
| 7335  | AGI_HUM1_OLIGO_A_23_P16682  | <a href="#">FLJ20244 ^ Hypothetical protein FLJ20244 ^ 55621</a>                                     | 4.494046604 | 0.746666667  | 0.166145733       | 1.67791155  | 2.68768222 |
| 11627 | AGI_HUM1_OLIGO_A_23_P256540 | <a href="#">MRPL33 ^ Mitochondrial ribosomal protein L33 ^ 9553</a>                                  | 4.493639203 | 1.389333333  | 0.309177767       | 2.619576027 | 2.68768222 |
| 19630 | AGI_HUM1_OLIGO_A_23_P54477  | <a href="#">NOLA3 ^ Nucleolar protein family A, member 3 (H/ACA small nucleolar RNPs) ^ 5550</a>     | 4.49228482  | 1.138333333  | 0.253397409       | 2.20126576  | 2.68768222 |
| 36476 | AGI_OLIGO_AK093890_1_2091   | <a href="#">FER1L3 ^ Fer-1-like 3, myoferlin (C. elegans) ^ 26509</a>                                | 4.484315417 | 1.543666667  | 0.344236862       | 2.915345092 | 2.68768222 |
| 32398 | AGI_HUM1_OLIGO_A_24_P943283 | <a href="#">FLJ20054 ^ Family with sequence similarity 31, member B ^ 54530</a>                      | 4.481670139 | 1.646666667  | 0.367422549       | 3.131093665 | 2.68768222 |
| 6592  | AGI_HUM1_OLIGO_A_23_P160214 | <a href="#">C1orf34 ^ Chromosome 1 open reading frame 34 ^ 22996</a>                                 | 4.478516575 | 1.276666667  | 0.285064629       | 2.422785474 | 2.68768222 |
| 1484  | AGI_HUM1_OLIGO_A_23_P113471 | <a href="#">FLJ31204 ^ Hypothetical protein FLJ31204 ^ 158584</a>                                    | 4.473944405 | 2.133333333  | 0.476835012       | 4.387299919 | 2.68768222 |
| 27548 | AGI_HUM1_OLIGO_A_24_P282363 | <a href="#">^ ^</a>                                                                                  | 4.464700582 | 1.608333333  | 0.36023319        | 3.048994047 | 2.68768222 |
| 22226 | AGI_HUM1_OLIGO_A_23_P78289  | <a href="#">FLJ14775 ^ Hypothetical protein FLJ14775 ^ 84923</a>                                     | 4.460268923 | 0.578333333  | 0.129663333       | 1.493123328 | 2.68768222 |
| 35360 | AGI_HUM1_OLIGO_A_32_P63162  | <a href="#">^ ^</a>                                                                                  | 4.459688938 | 0.973333333  | 0.218251395       | 1.96337171  | 2.68768222 |
| 256   | AGI_HUM1_OLIGO_A_23_P101949 | <a href="#">ARL5 ^ ADP-ribosylation factor-like 5 ^ 26225</a>                                        | 4.450755538 | 0.777666667  | 0.174726889       | 1.714355927 | 2.68768222 |
| 37213 | AGI_OLIGO_NKI_AF257175      | <a href="#">PECI ^ Peroxisomal D3,D2-enoyl-CoA isomerase ^ 10455</a>                                 | 4.443136423 | 2.972666667  | 0.669046904       | 7.849858599 | 2.68768222 |
| 20860 | AGI_HUM1_OLIGO_A_23_P65767  | <a href="#">C15orf15 ^ Chromosome 15 open reading frame 15 ^ 51187</a>                               | 4.437108275 | 0.866666667  | 0.195322407       | 1.823444977 | 2.68768222 |
| 16613 | AGI_HUM1_OLIGO_A_23_P396858 | <a href="#">FZD8 ^ Frizzled homolog 8 (Drosophila) ^ 8325</a>                                        | 4.436865215 | 1.268333333  | 0.285862489       | 2.408831256 | 2.68768222 |
| 7495  | AGI_HUM1_OLIGO_A_23_P1682   | <a href="#">LOC120224 ^ Hypothetical protein BC016153 ^ 120224</a>                                   | 4.435157695 | 1.536666667  | 0.346473964       | 2.901234011 | 2.68768222 |
| 13904 | AGI_HUM1_OLIGO_A_23_P33285  | <a href="#">CRIP1 ^ Cysteine-rich protein 1 (intestinal) ^ 1396</a>                                  | 4.432387827 | 2.093333333  | 0.472281175       | 4.267328972 | 2.68768222 |
| 28151 | AGI_HUM1_OLIGO_A_24_P32085  | <a href="#">MOBK12B ^ MOB1, Mps One Binder kinase activator-like 2B (yeast) ^ 79817</a>              | 4.430802793 | 1.920333333  | 0.433405282       | 3.785105031 | 2.68768222 |
| 17474 | AGI_HUM1_OLIGO_A_23_P417282 | <a href="#">IGF1R ^ Insulin-like growth factor 1 receptor ^ 3480</a>                                 | 4.42935328  | 1.914666667  | 0.43226777        | 3.770266926 | 2.68768222 |
| 10010 | AGI_HUM1_OLIGO_A_23_P214950 | <a href="#">PERP ^ PERP, TP53 apoptosis effector ^ 64065</a>                                         | 4.415326127 | 1.993333333  | 0.45145778        | 3.981558716 | 2.68768222 |
| 28750 | AGI_HUM1_OLIGO_A_24_P355876 | <a href="#">TEGT ^ Testis enhanced gene transcript (BAX inhibitor 1) ^ 7009</a>                      | 4.413059969 | 0.841333333  | 0.19064625        | 1.791705264 | 2.68768222 |
| 23501 | AGI_HUM1_OLIGO_A_23_P90369  | <a href="#">C19orf6 ^ Chromosome 19 open reading frame 6 ^ 91304</a>                                 | 4.409727664 | 0.585333333  | 0.132736844       | 1.500385612 | 2.87368322 |
| 38060 | AGI_OLIGO_NM_002293_2_7801  | <a href="#">LAMC1 ^ Laminin, gamma 1 (formerly LAMB2) ^ 3915</a>                                     | 4.407724929 | 2.916666667  | 0.661717034       | 7.550994501 | 2.87368322 |
| 11922 | AGI_HUM1_OLIGO_A_23_P259116 | <a href="#">TNFAIP8 ^ Tumor necrosis factor, alpha-induced protein 8 ^ 25816</a>                     | 4.403459195 | 2.212333333  | 0.502408047       | 4.634241838 | 2.87368322 |
| 38102 | AGI_OLIGO_NM_002462_2_2693  | <a href="#">MX1 ^ Myxovirus (influenza virus) resistance 1, interferon-inducible protein p78 (mo</a> | 4.400902325 | 2.172        | 0.493535153       | 4.506476914 | 2.87368322 |
| 35153 | AGI_HUM1_OLIGO_A_32_P50614  | <a href="#">^ ^</a>                                                                                  | 4.399545973 | 1.316185185  | 0.299163867       | 2.490068077 | 2.87368322 |
| 37464 | AGI_OLIGO_NM_000087_1_2405  | <a href="#">CNGA1 ^ Cyclic nucleotide gated channel alpha 1 ^ 1259</a>                               | 4.390570956 | 2.512        | 0.572135156       | 5.704102869 | 2.87368322 |
| 13466 | AGI_HUM1_OLIGO_A_23_P3221   | <a href="#">SQRDL ^ Sulfide quinone reductase-like (yeast) ^ 58472</a>                               | 4.390082648 | 2.196666667  | 0.500370231       | 4.584189448 | 2.87368322 |
| 5950  | AGI_HUM1_OLIGO_A_23_P154235 | <a href="#">NMI ^ N-myc (and STAT) interactor ^ 9111</a>                                             | 4.389887351 | 2.366666667  | 0.539117858       | 5.157481234 | 2.87368322 |
| 5410  | AGI_HUM1_OLIGO_A_23_P149529 | <a href="#">TACSTD2 ^ Tumor-associated calcium signal transducer 2 ^ 4070</a>                        | 4.389713461 | 1.006666667  | 0.229324004       | 2.009263349 | 2.87368322 |
| 23740 | AGI_HUM1_OLIGO_A_23_P9255   | <a href="#">SYK ^ Spleen tyrosine kinase ^ 6850</a>                                                  | 4.388848254 | 1.667        | 0.379826301       | 3.175535724 | 2.87368322 |
| 28889 | AGI_HUM1_OLIGO_A_24_P364363 | <a href="#">TNFRSF1A ^ Tumor necrosis factor receptor superfamily, member 1A ^ 7132</a>              | 4.387161582 | 1.672666667  | 0.381263976       | 3.188033229 | 2.87368322 |
| 22611 | AGI_HUM1_OLIGO_A_23_P81880  | <a href="#">CTDSP2 ^ CTD (carboxy-terminal domain, RNA polymerase II, polypeptide A) small ph</a>    | 4.386476662 | 1.322333333  | 0.301456826       | 2.500702323 | 2.87368322 |
| 16508 | AGI_HUM1_OLIGO_A_23_P394064 | <a href="#">PTRF ^ Polymerase I and transcript release factor ^ 284119</a>                           | 4.382705032 | 1.745666667  | 0.398308044       | 3.353497826 | 2.87368322 |
| 37709 | AGI_OLIGO_NM_000900_1_59    | <a href="#">MGP ^ Matrix Gla protein ^ 4256</a>                                                      | 4.375995088 | 2.029333333  | 0.463742141       | 4.082161708 | 2.87368322 |
| 1627  | AGI_HUM1_OLIGO_A_23_P115022 | <a href="#">MGC17299 ^ Hypothetical protein MGC17299 ^ 128218</a>                                    | 4.373333012 | 1.255333333  | 0.287042704       | 2.387222988 | 2.87368322 |
| 430   | AGI_HUM1_OLIGO_A_23_P103561 | <a href="#">NAV1 ^ Neuron navigator 1 ^ 89796</a>                                                    | 4.367362479 | 0.663666667  | 0.151960518       | 1.584103574 | 2.87368322 |
| 14582 | AGI_HUM1_OLIGO_A_23_P349481 | <a href="#">FLJ35630 ^ Hypothetical protein FLJ35630 ^ 166379</a>                                    | 4.361303276 | 2.487        | 0.570242389       | 5.606109796 | 2.87368322 |
| 17804 | AGI_HUM1_OLIGO_A_23_P42514  | <a href="#">^ ^</a>                                                                                  | 4.359740596 | 0.919        | 0.210792358       | 1.890804234 | 2.87368322 |
| 25948 | AGI_HUM1_OLIGO_A_24_P184305 | <a href="#">BBS1 ^ Bardet-Biedl syndrome 1 ^ 582</a>                                                 | 4.359452659 | 1.701049206  | 0.390197885       | 3.251373301 | 2.87368322 |
| 6876  | AGI_HUM1_OLIGO_A_23_P162746 | <a href="#">CRYL1 ^ Crystallin, lambda 1 ^ 51084</a>                                                 | 4.356764816 | 1.03         | 0.236413955       | 2.042024251 | 2.87368322 |
| 12984 | AGI_HUM1_OLIGO_A_23_P311740 | <a href="#">PARC ^ P53-associated parkin-like cytoplasmic protein ^ 23113</a>                        | 4.356420662 | 1.377666667  | 0.316238209       | 2.59847768  | 2.87368322 |
| 6548  | AGI_HUM1_OLIGO_A_23_P159764 | <a href="#">POF1B ^ Premature ovarian failure, 1B ^ 79983</a>                                        | 4.35463603  | 2.091866667  | 0.480376925       | 4.262992942 | 2.87368322 |
| 13253 | AGI_HUM1_OLIGO_A_23_P31765  | <a href="#">PKIA ^ Protein kinase (cAMP-dependent, catalytic) inhibitor alpha ^ 5569</a>             | 4.353433382 | 3.495666667  | 0.802967764       | 11.2797772  | 2.87368322 |
| 15771 | AGI_HUM1_OLIGO_A_23_P376799 | <a href="#">^ ^</a>                                                                                  | 4.338451589 | 0.581666667  | 0.134072411       | 1.496577164 | 2.87368322 |
| 36267 | AGI_OLIGO_AK023329_1_1638   | <a href="#">^ CDNA FLJ13267 fis, clone OVARC1000964 ^</a>                                            | 4.338025882 | 1.204666667  | 0.277699281       | 2.304840101 | 2.87368322 |

Supplementary Table S1. SAM between Lung mets and Parental models microarrays

## List of Significant Genes for Delta = 1.311: Positive genes (934) and Negative genes (297)

| Row   | Gene ID                     | Gene Name                                                                                             | Score(d)    | Numerator(r) | Denominator(s+s0) | Fold Change | q-value(%) |
|-------|-----------------------------|-------------------------------------------------------------------------------------------------------|-------------|--------------|-------------------|-------------|------------|
| 19800 | AGI_HUM1_OLIGO_A_23_P55936  | <a href="#">FCGRT ^ Fc fragment of IgG, receptor, transporter, alpha ^ 2217</a>                       | 4.332996933 | 1.815333333  | 0.418955601       | 3.519409366 | 2.87368322 |
| 34888 | AGI_HUM1_OLIGO_A_32_P40456  | <a href="#">^ Transcribed locus, weakly similar to NP_078810.1 Homo sapiens FLJ12684 gene ^</a>       | 4.324366301 | 2.191666667  | 0.506817997       | 4.568329357 | 2.87368322 |
| 20834 | AGI_HUM1_OLIGO_A_23_P65518  | <a href="#">DACT1 ^ Dapper homolog 1, antagonist of beta-catenin (xenopus) ^ 51339</a>                | 4.318044896 | 1.345333333  | 0.311560756       | 2.540888967 | 2.87368322 |
| 37712 | AGI_OLIGO_NM_000909_2_2591  | <a href="#">NPY1R ^ Neuropeptide Y receptor Y1 ^ 4886</a>                                             | 4.309623913 | 1.186666667  | 0.27535272        | 2.276262069 | 2.87368322 |
| 8862  | AGI_HUM1_OLIGO_A_23_P205768 | <a href="#">ARPP-19 ^ Cyclic AMP phosphoprotein, 19 kD ^ 10776</a>                                    | 4.306889262 | 0.753333333  | 0.17491356        | 1.68568309  | 2.87368322 |
| 37092 | AGI_OLIGO_BM969703_1_78     | <a href="#">^ ^</a>                                                                                   | 4.302129283 | 1.406333333  | 0.326892392       | 2.650626388 | 2.87368322 |
| 13233 | AGI_HUM1_OLIGO_A_23_P31713  | <a href="#">^ Hypothetical gene supported by BC055092 ^ 401466</a>                                    | 4.299828977 | 1.161        | 0.270010739       | 2.236123702 | 2.87368322 |
| 8340  | AGI_HUM1_OLIGO_A_23_P201628 | <a href="#">LAMC1 ^ Laminin, gamma 1 (formerly LAMB2) ^ 3915</a>                                      | 4.299106907 | 1.512666667  | 0.351856025       | 2.853369667 | 2.87368322 |
| 2885  | AGI_HUM1_OLIGO_A_23_P126593 | <a href="#">S100A11 ^ S100 calcium binding protein A11 (calgizzarin) ^ 6282</a>                       | 4.298368854 | 1.244666667  | 0.289567208       | 2.369637976 | 2.87368322 |
| 36580 | AGI_OLIGO_AK098212_1_3017   | <a href="#">FLJ10359 ^ Protein BAP28 ^ 55127</a>                                                      | 4.298163554 | 0.848        | 0.197293563       | 1.80000386  | 2.87368322 |
| 22261 | AGI_HUM1_OLIGO_A_23_P78554  | <a href="#">FBXL12 ^ F-box and leucine-rich repeat protein 12 ^ 54850</a>                             | 4.297312553 | 0.817666667  | 0.190273958       | 1.762553033 | 2.87368322 |
| 38593 | AGI_OLIGO_NM_004888_2_469   | <a href="#">ATP6V1G1 ^ ATPase, H+ transporting, lysosomal 13kDa, V1 subunit G isoform 1 ^ 955</a>     | 4.296135211 | 0.928333333  | 0.216085688       | 1.903076206 | 2.87368322 |
| 30188 | AGI_HUM1_OLIGO_A_24_P53976  | <a href="#">GLUL ^ Glutamate-ammonia ligase (glutamine synthase) ^ 2752</a>                           | 4.293119688 | 1.844666667  | 0.429679767       | 3.591699537 | 2.87368322 |
| 5907  | AGI_HUM1_OLIGO_A_23_P153905 | <a href="#">IER2 ^ Immediate early response 2 ^ 9592</a>                                              | 4.287730918 | 2.069666667  | 0.482695091       | 4.197896702 | 2.87368322 |
| 20918 | AGI_HUM1_OLIGO_A_23_P66260  | <a href="#">ZNF267 ^ Zinc finger protein 267 ^ 10308</a>                                              | 4.281540732 | 0.908666667  | 0.212228897       | 1.877309694 | 2.87368322 |
| 17744 | AGI_HUM1_OLIGO_A_23_P42347  | <a href="#">ETV7 ^ Ets variant gene 7 (TEL2 oncogene) ^ 51513</a>                                     | 4.280387345 | 1.363333333  | 0.318507          | 2.572789339 | 2.87368322 |
| 5102  | AGI_HUM1_OLIGO_A_23_P146548 | <a href="#">MOBK12B ^ MOB1, Mps One Binder kinase activator-like 2B (yeast) ^ 79817</a>               | 4.279404579 | 1.139259259  | 0.266219106       | 2.202678993 | 2.87368322 |
| 1386  | AGI_HUM1_OLIGO_A_23_P112541 | <a href="#">HDHD3 ^ Haloacid dehalogenase-like hydrolase domain containing 3 ^ 81932</a>              | 4.272685788 | 0.685666667  | 0.160476735       | 1.608445069 | 2.87368322 |
| 23195 | AGI_HUM1_OLIGO_A_23_P87560  | <a href="#">BTG1 ^ B-cell translocation gene 1, anti-proliferative ^ 694</a>                          | 4.269167277 | 1.005333333  | 0.235486986       | 2.007407253 | 2.87368322 |
| 36719 | AGI_OLIGO_AL832719_1_4101   | <a href="#">GCNT2 ^ Glucosaminyl (N-acetyl) transferase 2, I-branching enzyme ^ 2651</a>              | 4.268938738 | 1.075666667  | 0.251975194       | 2.107695809 | 2.87368322 |
| 8822  | AGI_HUM1_OLIGO_A_23_P205480 | <a href="#">SLC7A8 ^ Solute carrier family 7 (cationic amino acid transporter, y+ system), membe</a>  | 4.267225014 | 2.72         | 0.637416586       | 6.588728138 | 2.87368322 |
| 34280 | AGI_HUM1_OLIGO_A_32_P219520 | <a href="#">TNFAIP8 ^ Tumor necrosis factor, alpha-induced protein 8 ^ 25816</a>                      | 4.265182473 | 2.152333333  | 0.504628664       | 4.445461916 | 2.87368322 |
| 30378 | AGI_HUM1_OLIGO_A_24_P59607  | <a href="#">^ ^</a>                                                                                   | 4.262090247 | 1.115        | 0.261608726       | 2.165950091 | 2.87368322 |
| 22185 | AGI_HUM1_OLIGO_A_23_P7791   | <a href="#">OGFRL1 ^ Opioid growth factor receptor-like 1 ^ 79627</a>                                 | 4.257995489 | 1.623333333  | 0.381243554       | 3.080860445 | 2.87368322 |
| 22873 | AGI_HUM1_OLIGO_A_23_P84388  | <a href="#">ITLN1 ^ Intelectin 1 (galactofuranose binding) ^ 55600</a>                                | 4.257723657 | 0.734733333  | 0.172564824       | 1.664089852 | 2.87368322 |
| 16163 | AGI_HUM1_OLIGO_A_23_P386030 | <a href="#">SNTB1 ^ Syntrophin, beta 1 (dystrophin-associated protein A1, 59kDa, basic compon</a>     | 4.256025319 | 1.242037037  | 0.291830275       | 2.365322723 | 2.87368322 |
| 30798 | AGI_HUM1_OLIGO_A_24_P71973  | <a href="#">KDR ^ Kinase insert domain receptor (a type III receptor tyrosine kinase) ^ 3791</a>      | 4.253294759 | 0.890851852  | 0.209449827       | 1.854270671 | 2.87368322 |
| 16442 | AGI_HUM1_OLIGO_A_23_P392529 | <a href="#">C21orf81 ^ Chromosome 21 open reading frame 81 ^ 114035</a>                               | 4.249175996 | 1.896        | 0.446204159       | 3.721798631 | 2.87368322 |
| 23401 | AGI_HUM1_OLIGO_A_23_P89431  | <a href="#">CCL2 ^ Chemokine (C-C motif) ligand 2 ^ 6347</a>                                          | 4.244733365 | 3.136333333  | 0.738876406       | 8.792865089 | 3.1670754  |
| 14193 | AGI_HUM1_OLIGO_A_23_P340123 | <a href="#">TRIM29 ^ Tripartite motif-containing 29 ^ 23650</a>                                       | 4.242848038 | 1.3342       | 0.314458587       | 2.521356293 | 3.1670754  |
| 37294 | AGI_OLIGO_NKI_CONTIG8581_RC | <a href="#">^ ^</a>                                                                                   | 4.240362395 | 1.083333333  | 0.255481309       | 2.118926189 | 3.1670754  |
| 19375 | AGI_HUM1_OLIGO_A_23_P52046  | <a href="#">VAMP4 ^ Vesicle-associated membrane protein 4 ^ 8674</a>                                  | 4.233683608 | 1.084333333  | 0.25612054        | 2.120395426 | 3.1670754  |
| 28439 | AGI_HUM1_OLIGO_A_24_P337592 | <a href="#">BTN2A2 ^ Butyrophilin, subfamily 2, member A2 ^ 10385</a>                                 | 4.232563648 | 0.966666667  | 0.228387981       | 1.954319937 | 3.1670754  |
| 25377 | AGI_HUM1_OLIGO_A_24_P148043 | <a href="#">FAM20B ^ Family with sequence similarity 20, member B ^ 9917</a>                          | 4.226107235 | 1.130666667  | 0.267543298       | 2.189598978 | 3.1670754  |
| 28427 | AGI_HUM1_OLIGO_A_24_P337058 | <a href="#">CCNL1 ^ Cyclin L1 ^ 57018</a>                                                             | 4.21953178  | 1.332        | 0.315674835       | 2.517514347 | 3.1670754  |
| 4942  | AGI_HUM1_OLIGO_A_23_P145096 | <a href="#">PLA2G7 ^ Phospholipase A2, group VII (platelet-activating factor acetylhydrolase, pla</a> | 4.218589059 | 1.129        | 0.267625024       | 2.187070915 | 3.1670754  |
| 14729 | AGI_HUM1_OLIGO_A_23_P352957 | <a href="#">USP36 ^ Ubiquitin specific protease 36 ^ 57602</a>                                        | 4.216740084 | 1.840333333  | 0.436435089       | 3.580927558 | 3.1670754  |
| 8113  | AGI_HUM1_OLIGO_A_23_P19673  | <a href="#">SGK ^ Serum/glucocorticoid regulated kinase ^ 6446</a>                                    | 4.212179559 | 1.916333333  | 0.454950532       | 3.774625026 | 3.1670754  |
| 39186 | AGI_OLIGO_NM_015548_1_16296 | <a href="#">DST ^ Dystonin ^ 667</a>                                                                  | 4.207310553 | 1.713333333  | 0.407227684       | 3.279175994 | 3.1670754  |
| 38148 | AGI_OLIGO_NM_002648_1_1769  | <a href="#">PIM1 ^ Pim-1 oncogene ^ 5292</a>                                                          | 4.20606831  | 0.901333333  | 0.214293556       | 1.867791391 | 3.1670754  |
| 36247 | AGI_OLIGO_AK001536_1_2390   | <a href="#">^ CDNA FLJ10674 fis, clone NT2RP2006436 ^</a>                                             | 4.205228694 | 1.385333333  | 0.329431152       | 2.612323079 | 3.1670754  |
| 15942 | AGI_HUM1_OLIGO_A_23_P380945 | <a href="#">FLJ32191 ^ Hypothetical protein FLJ32191 ^ 147923</a>                                     | 4.204865514 | 1.071666667  | 0.254863482       | 2.101860129 | 3.1670754  |
| 30295 | AGI_HUM1_OLIGO_A_24_P57528  | <a href="#">SLC39A11 ^ Solute carrier family 39 (metal ion transporter), member 11 ^ 201266</a>       | 4.204068936 | 1.922        | 0.457176138       | 3.789480282 | 3.1670754  |
| 10320 | AGI_HUM1_OLIGO_A_23_P217528 | <a href="#">KLF8 ^ Kruppel-like factor 8 ^ 11279</a>                                                  | 4.202066535 | 4.082208333  | 0.971476367       | 16.93819611 | 3.1670754  |
| 32371 | AGI_HUM1_OLIGO_A_24_P942730 | <a href="#">FLJ35867 ^ Hypothetical protein FLJ35867 ^ 146050</a>                                     | 4.198094168 | 0.862666667  | 0.205490071       | 1.818396316 | 3.1670754  |
| 22197 | AGI_HUM1_OLIGO_A_23_P78018  | <a href="#">ABCA5 ^ ATP-binding cassette, sub-family A (ABC1), member 5 ^ 23461</a>                   | 4.197701687 | 1.176666667  | 0.280312122       | 2.260538779 | 3.1670754  |

Supplementary Table S1. SAM between Lung mets and Parental models microarrays

List of Significant Genes for Delta = 1.311: Positive genes (934) and Negative genes (297)

| Row   | Gene ID                     | Gene Name                                                                                                         | Score(d)    | Numerator(r) | Denominator(s+s0) | Fold Change | q-value(%) |
|-------|-----------------------------|-------------------------------------------------------------------------------------------------------------------|-------------|--------------|-------------------|-------------|------------|
| 34495 | AGI_HUM1_OLIGO_A_32_P2333   | <a href="#">PC4 ^ Activated RNA polymerase II transcription cofactor 4 ^ 10923</a>                                | 4.195986832 | 0.819666667  | 0.195345386       | 1.764998144 | 3.1670754  |
| 1556  | AGI_HUM1_OLIGO_A_23_P114172 | <a href="#">FLJ20298 ^ FLJ20298 protein ^ 54885</a>                                                               | 4.194269467 | 1.249333333  | 0.297866731       | 2.377315423 | 3.1670754  |
| 26699 | AGI_HUM1_OLIGO_A_24_P229726 | <a href="#">^ ^</a>                                                                                               | 4.192102939 | 1.072037037  | 0.255727746       | 2.102399791 | 3.1670754  |
| 14867 | AGI_HUM1_OLIGO_A_23_P356088 | <a href="#">TMEM23 ^ Transmembrane protein 23 ^ 259230</a>                                                        | 4.189546623 | 1.461333333  | 0.348804648       | 2.753627353 | 3.1670754  |
| 13411 | AGI_HUM1_OLIGO_A_23_P3212   | <a href="#">MDS009 ^ X 009 protein ^ 56986</a>                                                                    | 4.187393111 | 0.743666667  | 0.177596573       | 1.674426056 | 3.1670754  |
| 9683  | AGI_HUM1_OLIGO_A_23_P21234  | <a href="#">^ ^</a>                                                                                               | 4.187142479 | 1.098333333  | 0.262310953       | 2.141072032 | 3.1670754  |
| 12548 | AGI_HUM1_OLIGO_A_23_P301530 | <a href="#">ANK3 ^ Ankyrin 3, node of Ranvier (ankyrin G) ^ 288</a>                                               | 4.18646093  | 0.880333333  | 0.210281034       | 1.840800567 | 3.1670754  |
| 36715 | AGI_OLIGO_AL832675_1_6484   | <a href="#">^ ^</a>                                                                                               | 4.184574699 | 0.949666667  | 0.226944608       | 1.931426352 | 3.1670754  |
| 38663 | AGI_OLIGO_NM_005252_2_1501  | <a href="#">FOS ^ V-fos FBJ murine osteosarcoma viral oncogene homolog ^ 2353</a>                                 | 4.175910947 | 3.136666667  | 0.751133515       | 8.794896907 | 3.1670754  |
| 8172  | AGI_HUM1_OLIGO_A_23_P200239 | <a href="#">DJ167A19.1 ^ Hypothetical protein DJ167A19.1 ^ 54432</a>                                              | 4.171327067 | 0.850333333  | 0.203851992       | 1.802917439 | 3.1670754  |
| 16443 | AGI_HUM1_OLIGO_A_23_P392541 | <a href="#">SPG20 ^ Spastic paraplegia 20, spartin (Trojer syndrome) ^ 23111</a>                                  | 4.161321455 | 1.757444444  | 0.422328451       | 3.380986942 | 3.1670754  |
| 718   | AGI_HUM1_OLIGO_A_23_P106192 | <a href="#">FOS ^ V-fos FBJ murine osteosarcoma viral oncogene homolog ^ 2353</a>                                 | 4.160022581 | 3.436666667  | 0.826117311       | 10.82778819 | 3.1670754  |
| 21367 | AGI_HUM1_OLIGO_A_23_P70409  | <a href="#">POLR1C ^ Polymerase (RNA) I polypeptide C, 30kDa ^ 9533</a>                                           | 4.156603682 | 0.847        | 0.203772133       | 1.798756624 | 3.1670754  |
| 38367 | AGI_OLIGO_NM_003739_4_1128  | <a href="#">AKR1C3 ^ Aldo-keto reductase family 1, member C3 (3-alpha hydroxysteroid dehydrogenase) ^ 23111</a>   | 4.154555812 | 2.040333333  | 0.491107455       | 4.113405595 | 3.1670754  |
| 38722 | AGI_OLIGO_NM_005562_1_5085  | <a href="#">LAMC2 ^ Laminin, gamma 2 ^ 3918</a>                                                                   | 4.153574612 | 3.046666667  | 0.73350474        | 8.263005721 | 3.1670754  |
| 38711 | AGI_OLIGO_NM_005544_1_5682  | <a href="#">IRS1 ^ Insulin receptor substrate 1 ^ 3667</a>                                                        | 4.153186484 | 3.514333333  | 0.846177591       | 11.42667165 | 3.1670754  |
| 10131 | AGI_HUM1_OLIGO_A_23_P215956 | <a href="#">MYC ^ V-myc myelocytomatosis viral oncogene homolog (avian) ^ 4609</a>                                | 4.152111996 | 2            | 0.481682576       | 4           | 3.1670754  |
| 13493 | AGI_HUM1_OLIGO_A_23_P32279  | <a href="#">BARX1 ^ BarH-like homeobox 1 ^ 56033</a>                                                              | 4.151883882 | 0.961666667  | 0.231621764       | 1.947558504 | 3.1670754  |
| 17682 | AGI_HUM1_OLIGO_A_23_P422222 | <a href="#">C6orf62 ^ Chromosome 6 open reading frame 62 ^ 81688</a>                                              | 4.150395057 | 0.87         | 0.2096186         | 1.8276629   | 3.1670754  |
| 10482 | AGI_HUM1_OLIGO_A_23_P218774 | <a href="#">RAC2 ^ Ras-related C3 botulinum toxin substrate 2 (rho family, small GTP binding protein) ^ 23111</a> | 4.14938197  | 1.645666667  | 0.396605248       | 3.128924108 | 3.1670754  |
| 10856 | AGI_HUM1_OLIGO_A_23_P24883  | <a href="#">ST5 ^ Suppression of tumorigenicity 5 ^ 6764</a>                                                      | 4.143077574 | 1.049333333  | 0.25327388        | 2.069573281 | 3.1670754  |
| 8121  | AGI_HUM1_OLIGO_A_23_P19770  | <a href="#">DPP6 ^ Dipeptidylpeptidase 6 ^ 1804</a>                                                               | 4.137934208 | 1.243148148  | 0.300427239       | 2.36714511  | 3.1670754  |
| 2204  | AGI_HUM1_OLIGO_A_23_P120252 | <a href="#">DUSP22 ^ Dual specificity phosphatase 22 ^ 56940</a>                                                  | 4.137856967 | 0.881333333  | 0.212992701       | 1.842076955 | 3.1670754  |
| 25881 | AGI_HUM1_OLIGO_A_24_P179611 | <a href="#">TPR ^ Translocated promoter region (to activated MET oncogene) ^ 7175</a>                             | 4.128772115 | 0.731333333  | 0.177130952       | 1.660172708 | 3.1670754  |
| 35913 | AGI_HUM1_OLIGO_A_32_P9753   | <a href="#">VMP1 ^ Likely ortholog of rat vacuole membrane protein 1 ^ 81671</a>                                  | 4.124100624 | 2.572        | 0.623651126       | 5.946331938 | 3.1670754  |
| 4321  | AGI_HUM1_OLIGO_A_23_P139669 | <a href="#">SLC2A3 ^ Solute carrier family 2 (facilitated glucose transporter), member 3 ^ 6515</a>               | 4.123782867 | 2.001766667  | 0.485419997       | 4.00490124  | 3.1670754  |
| 15980 | AGI_HUM1_OLIGO_A_23_P381714 | <a href="#">CA13 ^ Carbonic anhydrase XIII ^ 377677</a>                                                           | 4.119610293 | 1.792814815  | 0.435190391       | 3.46490264  | 3.1670754  |
| 18947 | AGI_HUM1_OLIGO_A_23_P49708  | <a href="#">GRN ^ Granulin ^ 2896</a>                                                                             | 4.119454822 | 1.301333333  | 0.315899407       | 2.464565517 | 3.1670754  |
| 30685 | AGI_HUM1_OLIGO_A_24_P683011 | <a href="#">^ ^</a>                                                                                               | 4.118857607 | 2.295666667  | 0.557355191       | 4.909808198 | 3.1670754  |
| 38814 | AGI_OLIGO_NM_006208_1_3292  | <a href="#">ENPP1 ^ Ectonucleotide pyrophosphatase/phosphodiesterase 1 ^ 5167</a>                                 | 4.117303616 | 0.688421296  | 0.167201975       | 1.61151911  | 3.1670754  |
| 29791 | AGI_HUM1_OLIGO_A_24_P418408 | <a href="#">MGC15887 ^ Hypothetical gene supported by BC009447 ^ 375061</a>                                       | 4.112173767 | 1.834666667  | 0.446154946       | 3.566889856 | 3.1670754  |
| 13984 | AGI_HUM1_OLIGO_A_23_P334883 | <a href="#">SHANK2 ^ SH3 and multiple ankyrin repeat domains 2 ^ 22941</a>                                        | 4.109424969 | 1.315        | 0.319996109       | 2.488023307 | 3.1670754  |
| 5562  | AGI_HUM1_OLIGO_A_23_P150960 | <a href="#">MGC13168 ^ Hypothetical protein MGC13168 ^ 84821</a>                                                  | 4.108784364 | 1.325333333  | 0.322560937       | 2.505907798 | 3.1670754  |
| 10722 | AGI_HUM1_OLIGO_A_23_P23664  | <a href="#">PALMD ^ Palmelphin ^ 54873</a>                                                                        | 4.103148824 | 2.801        | 0.682646455       | 6.969233537 | 3.1670754  |
| 18321 | AGI_HUM1_OLIGO_A_23_P43910  | <a href="#">^ ^</a>                                                                                               | 4.100691241 | 1.051333333  | 0.25637954        | 2.072444308 | 3.1670754  |
| 38660 | AGI_OLIGO_NM_005245_1_14591 | <a href="#">FAT ^ FAT tumor suppressor homolog 1 (Drosophila) ^ 2195</a>                                          | 4.097307694 | 1.43         | 0.349009669       | 2.694467154 | 3.1670754  |
| 8079  | AGI_HUM1_OLIGO_A_23_P19389  | <a href="#">HMGNA4 ^ High mobility group nucleosomal binding domain 4 ^ 10473</a>                                 | 4.093743773 | 0.833333333  | 0.203562651       | 1.781797436 | 3.1670754  |
| 32622 | AGI_HUM1_OLIGO_A_32_P104432 | <a href="#">^ CDNA FLJ41308 fis, clone BRAMY2042612 ^</a>                                                         | 4.092389459 | 1.398        | 0.341609716       | 2.635359903 | 3.1670754  |
| 27959 | AGI_HUM1_OLIGO_A_24_P30806  | <a href="#">CRI1 ^ CREBBP/EP300 inhibitor 1 ^ 23741</a>                                                           | 4.089150594 | 1.096666667  | 0.268189357       | 2.138599997 | 3.1670754  |
| 16210 | AGI_HUM1_OLIGO_A_23_P387071 | <a href="#">MGC20398 ^ Hypothetical protein MGC20398 ^ 91603</a>                                                  | 4.088581168 | 1.099333333  | 0.268878931       | 2.142556625 | 3.1670754  |
| 7320  | AGI_HUM1_OLIGO_A_23_P166686 | <a href="#">AMOTL2 ^ Angiomotin like 2 ^ 51421</a>                                                                | 4.08579209  | 1.492        | 0.365167871       | 2.8127864   | 3.1670754  |
| 7072  | AGI_HUM1_OLIGO_A_23_P16443  | <a href="#">UBXD1 ^ UBX domain containing 1 ^ 80700</a>                                                           | 4.084241152 | 0.944        | 0.231132287       | 1.923854909 | 3.1670754  |
| 4033  | AGI_HUM1_OLIGO_A_23_P136978 | <a href="#">SRPX2 ^ Sushi-repeat-containing protein, X-linked 2 ^ 27286</a>                                       | 4.083286287 | 2.142640741  | 0.52473439        | 4.415695657 | 3.1670754  |
| 11680 | AGI_HUM1_OLIGO_A_23_P257003 | <a href="#">PCSK5 ^ Proprotein convertase subtilisin/kexin type 5 ^ 5125</a>                                      | 4.078620004 | 1.979666667  | 0.485376589       | 3.944019451 | 3.1670754  |
| 22760 | AGI_HUM1_OLIGO_A_23_P83298  | <a href="#">PRRX2 ^ Paired related homeobox 2 ^ 51450</a>                                                         | 4.078011556 | 1.341185185  | 0.328882144       | 2.5335937   | 3.1670754  |
| 4498  | AGI_HUM1_OLIGO_A_23_P141235 | <a href="#">POLR2A ^ Polymerase (RNA) II (DNA directed) polypeptide A, 220kDa ^ 5430</a>                          | 4.076219874 | 0.743        | 0.182276723       | 1.673652485 | 3.1670754  |

Supplementary Table S1. SAM between Lung mets and Parental models microarrays

## List of Significant Genes for Delta = 1.311: Positive genes (934) and Negative genes (297)

| Row   | Gene ID                      | Gene Name                                                                                                | Score(d)    | Numerator(r) | Denominator(s+s0) | Fold Change | q-value(%) |
|-------|------------------------------|----------------------------------------------------------------------------------------------------------|-------------|--------------|-------------------|-------------|------------|
| 36705 | AGI_OLIGO_AL832532_1_3645    | <a href="#">PTPLB ^ Protein tyrosine phosphatase-like (proline instead of catalytic arginine), men</a>   | 4.07589754  | 0.665333333  | 0.16323603        | 1.58593466  | 3.1670754  |
| 13473 | AGI_HUM1_OLIGO_A_23_P32233   | <a href="#">KLF4 ^ Kruppel-like factor 4 (gut) ^ 9314</a>                                                | 4.074284263 | 1.480666667  | 0.363417614       | 2.790776647 | 3.1670754  |
| 15646 | AGI_HUM1_OLIGO_A_23_P374053  | ^ ^                                                                                                      | 4.06426086  | 1.564333333  | 0.384899835       | 2.95740809  | 3.1670754  |
| 12938 | AGI_HUM1_OLIGO_A_23_P310560  | <a href="#">FLJ31265 ^ Hypothetical protein FLJ31265 ^ 131870</a>                                        | 4.062762396 | 0.987666667  | 0.243102247       | 1.982975244 | 3.1670754  |
| 12155 | AGI_HUM1_OLIGO_A_23_P27147   | <a href="#">ANAPC11 ^ APC11 anaphase promoting complex subunit 11 homolog (yeast) ^ 51529</a>            | 4.060572003 | 0.6          | 0.147762433       | 1.515716567 | 3.1670754  |
| 22500 | AGI_HUM1_OLIGO_A_23_P80739   | <a href="#">PLCD1 ^ Phospholipase C, delta 1 ^ 5333</a>                                                  | 4.05813674  | 0.840333333  | 0.207073686       | 1.790463779 | 3.1670754  |
| 19606 | AGI_HUM1_OLIGO_A_23_P54276   | <a href="#">CRI1 ^ CREBBP/EP300 inhibitor 1 ^ 23741</a>                                                  | 4.057385378 | 0.968666667  | 0.238741597       | 1.957031078 | 3.1670754  |
| 16181 | AGI_HUM1_OLIGO_A_23_P386398  | <a href="#">C6orf141 ^ Chromosome 6 open reading frame 141 ^ 135398</a>                                  | 4.057313492 | 1.28         | 0.315479689       | 2.428389769 | 3.1670754  |
| 37816 | AGI_OLIGO_NM_001400_2_2484   | <a href="#">EDG1 ^ Endothelial differentiation, sphingolipid G-protein-coupled receptor, 1 ^ 190J</a>    | 4.052815727 | 1.243300926  | 0.306774601       | 2.367395798 | 3.1670754  |
| 18542 | AGI_HUM1_OLIGO_A_23_P46118   | <a href="#">CHML ^ Choroideremia-like (Rab escort protein 2) ^ 1122</a>                                  | 4.050223189 | 0.978333333  | 0.241550475       | 1.970188043 | 3.1670754  |
| 19324 | AGI_HUM1_OLIGO_A_23_P51580   | <a href="#">HSD3B2 ^ Hydroxy-delta-5-steroid dehydrogenase, 3 beta- and steroid delta-isomera</a>        | 4.049085197 | 2.282333333  | 0.563666414       | 4.864640974 | 3.1670754  |
| 27424 | AGI_HUM1_OLIGO_A_24_P274615  | <a href="#">ARRDC3 ^ Arrestin domain containing 3 ^ 57561</a>                                            | 4.048170171 | 1.151        | 0.284325992       | 2.220677667 | 3.1670754  |
| 39247 | AGI_OLIGO_NM_016588_1_1051   | <a href="#">NRN1 ^ Neuritin 1 ^ 51299</a>                                                                | 4.046889883 | 1.937666667  | 0.478803902       | 3.830855655 | 3.1670754  |
| 36149 | AGI_OLIGO_AF205218_1_3999    | <a href="#">IVNS1ABP ^ Influenza virus NS1A binding protein ^ 10625</a>                                  | 4.045435261 | 1.418        | 0.350518525       | 2.672148157 | 3.1670754  |
| 23339 | AGI_HUM1_OLIGO_A_23_P88865   | <a href="#">CKLFSF3 ^ Chemokine-like factor super family 3 ^ 123920</a>                                  | 4.04346017  | 3.901        | 0.964767757       | 14.93887912 | 3.1670754  |
| 4702  | AGI_HUM1_OLIGO_A_23_P143016  | <a href="#">ARID5A ^ AT rich interactive domain 5A (MRF1-like) ^ 10865</a>                               | 4.042411394 | 2.097        | 0.518749775       | 4.278188352 | 3.1670754  |
| 6340  | AGI_HUM1_OLIGO_A_23_P157669  | <a href="#">NDUFB9 ^ NADH dehydrogenase (ubiquinone) 1 beta subcomplex, 9, 22kDa ^ 4715</a>              | 4.04001598  | 0.696666667  | 0.172441562       | 1.620755722 | 3.1670754  |
| 35284 | AGI_HUM1_OLIGO_A_32_P57810   | ^ ^                                                                                                      | 4.038913191 | 1.113333333  | 0.275651711       | 2.163449332 | 3.1670754  |
| 29787 | AGI_HUM1_OLIGO_A_24_P418176  | ^ ^                                                                                                      | 4.036253349 | 0.634481481  | 0.157195653       | 1.552379709 | 3.1670754  |
| 37258 | AGI_OLIGO_NKI_CONTIG44799_RC | ^ ^                                                                                                      | 4.032453288 | 1.883333333  | 0.467044055       | 3.689264774 | 3.1670754  |
| 36971 | AGI_OLIGO_BF110534_1_248     | <a href="#">RASGEF1B ^ RasGEF domain family, member 1B ^ 153020</a>                                      | 4.031389075 | 2.873        | 0.712657584       | 7.325869491 | 3.1670754  |
| 37544 | AGI_OLIGO_NM_000310_1_2122   | <a href="#">PPT1 ^ Palmitoyl-protein thioesterase 1 (ceroid-lipofuscinosis, neuronal 1, infantile) ^</a> | 4.025724293 | 1.424333333  | 0.353807968       | 2.683904492 | 3.1670754  |
| 23623 | AGI_HUM1_OLIGO_A_32_P9152    | <a href="#">RCL1 ^ RNA terminal phosphate cyclase-like 1 ^ 10171</a>                                     | 4.025384602 | 0.75         | 0.1863176         | 1.681792831 | 3.1670754  |
| 2886  | AGI_HUM1_OLIGO_A_23_P126594  | <a href="#">S100A11 ^ S100 calcium binding protein A11 (calgizzarin) ^ 6282</a>                          | 4.022807475 | 1.07         | 0.265983398       | 2.099433367 | 3.1670754  |
| 6330  | AGI_HUM1_OLIGO_A_23_P157580  | <a href="#">SDCBP ^ Syndecan binding protein (syntenin) ^ 6386</a>                                       | 4.022772643 | 1.403666667  | 0.348930151       | 2.645731515 | 3.1670754  |
| 15217 | AGI_HUM1_OLIGO_A_23_P364024  | <a href="#">GLIPR1 ^ GLI pathogenesis-related 1 (glioma) ^ 11010</a>                                     | 4.021716521 | 0.8524       | 0.2119493         | 1.805501977 | 3.1670754  |
| 2242  | AGI_HUM1_OLIGO_A_23_P120594  | <a href="#">ACAS2L ^ Acetyl-Coenzyme A synthetase 2 (AMP forming)-like ^ 84532</a>                       | 4.01758139  | 1.823333333  | 0.453838555       | 3.538979325 | 3.1670754  |
| 30530 | AGI_HUM1_OLIGO_A_24_P64241   | ^ ^                                                                                                      | 4.017499965 | 3.206333333  | 0.798091689       | 9.230017181 | 3.1670754  |
| 25086 | AGI_HUM1_OLIGO_A_24_P13001   | <a href="#">SORCS3 ^ Sortilin-related VPS10 domain containing receptor 3 ^ 22986</a>                     | 4.014756471 | 2.085948148  | 0.519570281       | 4.245540244 | 3.1670754  |
| 37224 | AGI_OLIGO_NKI_AL137502       | <a href="#">RRAGD ^ Ras-related GTP binding D ^ 58528</a>                                                | 4.013724036 | 1.263333333  | 0.314753412       | 2.400497333 | 3.1670754  |
| 9246  | AGI_HUM1_OLIGO_A_23_P20882   | <a href="#">ATP6V1G1 ^ ATPase, H+ transporting, lysosomal 13kDa, V1 subunit G isoform 1 ^ 955</a>        | 4.012722241 | 0.85         | 0.211826274       | 1.802500925 | 3.1670754  |
| 5082  | AGI_HUM1_OLIGO_A_23_P14636   | <a href="#">MFAP1 ^ Microfibrillar-associated protein 1 ^ 4236</a>                                       | 4.010051555 | 0.493666667  | 0.123107312       | 1.408018868 | 3.1670754  |
| 16512 | AGI_HUM1_OLIGO_A_23_P394216  | <a href="#">KIAA0329 ^ KIAA0329 ^ 9895</a>                                                               | 4.009719266 | 0.908        | 0.226449769       | 1.876442393 | 3.1670754  |
| 35481 | AGI_HUM1_OLIGO_A_32_P71796   | ^ ^                                                                                                      | 4.00678754  | 1.118        | 0.279026524       | 2.170458744 | 3.1670754  |
| 39044 | AGI_OLIGO_NM_013994_1_3786   | <a href="#">DDR1 ^ Discoidin domain receptor family, member 1 ^ 780</a>                                  | 4.006564539 | 1.466333333  | 0.365982706       | 2.763187254 | 3.1670754  |
| 9855  | AGI_HUM1_OLIGO_A_23_P213678  | <a href="#">PAM ^ Peptidylglycine alpha-amidating monooxygenase ^ 5066</a>                               | 4.00616787  | 2.466666667  | 0.615717251       | 5.52765152  | 3.1670754  |
| 13435 | AGI_HUM1_OLIGO_A_23_P321497  | <a href="#">C21orf99 ^ Chromosome 21 open reading frame 99 ^ 149992</a>                                  | 4.00513319  | 1.183416667  | 0.295474984       | 2.271140041 | 3.1670754  |
| 15487 | AGI_HUM1_OLIGO_A_23_P370514  | ^ ^                                                                                                      | 4.003142353 | 0.996333333  | 0.24888781        | 1.99423375  | 3.1670754  |
| 735   | AGI_HUM1_OLIGO_A_23_P106405  | <a href="#">NDN ^ Necdin homolog (mouse) ^ 4692</a>                                                      | 4.002385812 | 1.557333333  | 0.389101253       | 2.943093412 | 3.1670754  |
| 33199 | AGI_HUM1_OLIGO_A_32_P144421  | ^ ^                                                                                                      | 4.001228285 | 0.885        | 0.221182081       | 1.846764621 | 3.1670754  |
| 18594 | AGI_HUM1_OLIGO_A_23_P46588   | <a href="#">IRF2BP2 ^ Interferon regulatory factor 2 binding protein 2 ^ 359948</a>                      | 3.99971     | 2.053333333  | 0.513370553       | 4.150638637 | 3.1670754  |
| 32222 | AGI_HUM1_OLIGO_A_24_P938293  | <a href="#">HES1 ^ Hairy and enhancer of split 1, (Drosophila) ^ 3280</a>                                | 3.998777097 | 2.475        | 0.618939226       | 5.559672879 | 3.1670754  |
| 3714  | AGI_HUM1_OLIGO_A_23_P133923  | <a href="#">BAT4 ^ HLA-B associated transcript 4 ^ 7918</a>                                              | 3.998348605 | 0.713333333  | 0.178406988       | 1.639587997 | 3.1670754  |
| 21750 | AGI_HUM1_OLIGO_A_23_P7397    | <a href="#">PCDHB10 ^ Protocadherin beta 10 ^ 56126</a>                                                  | 3.998330956 | 2.901866667  | 0.725769502       | 7.473928006 | 3.1670754  |
| 20245 | AGI_HUM1_OLIGO_A_23_P59921   | <a href="#">PC4 ^ Activated RNA polymerase II transcription cofactor 4 ^ 10923</a>                       | 3.997192651 | 0.713666667  | 0.178541974       | 1.639966866 | 3.1670754  |
| 19904 | AGI_HUM1_OLIGO_A_23_P56827   | <a href="#">ASB3 ^ Ankyrin repeat and SOCS box-containing 3 ^ 51130</a>                                  | 3.993768001 | 0.850666667  | 0.212998518       | 1.80333405  | 3.1670754  |

Supplementary Table S1. SAM between Lung mets and Parental models microarrays

List of Significant Genes for Delta = 1.311: Positive genes (934) and Negative genes (297)

| Row   | Gene ID                     | Gene Name                                                                                          | Score(d)    | Numerator(r) | Denominator(s+s0) | Fold Change | q-value(%) |
|-------|-----------------------------|----------------------------------------------------------------------------------------------------|-------------|--------------|-------------------|-------------|------------|
| 39455 | AGI_OLIGO_NM_022551_2_489   | <a href="#">RPS18 ^ Ribosomal protein S18 ^ 6222</a>                                               | 3.98822234  | 1.186333333  | 0.297459177       | 2.275736202 | 3.1670754  |
| 12019 | AGI_HUM1_OLIGO_A_23_P26021  | <a href="#">COP52 ^ COP9 constitutive photomorphogenic homolog subunit 2 (Arabidopsis) ^ 93</a>    | 3.985606491 | 0.688333333  | 0.17270479        | 1.611420856 | 3.1670754  |
| 2911  | AGI_HUM1_OLIGO_A_23_P126803 | <a href="#">ARPC5 ^ Actin related protein 2/3 complex, subunit 5, 16kDa ^ 10092</a>                | 3.982011923 | 1.152        | 0.289300992       | 2.222217457 | 3.1670754  |
| 11261 | AGI_HUM1_OLIGO_A_23_P253221 | <a href="#">ARHGEF4 ^ Rho guanine nucleotide exchange factor (GEF) 4 ^ 50649</a>                   | 3.978137446 | 1.360666667  | 0.342036112       | 2.568038207 | 3.1670754  |
| 3423  | AGI_HUM1_OLIGO_A_23_P131330 | <a href="#">LRRTM1 ^ Leucine rich repeat transmembrane neuronal 1 ^ 347730</a>                     | 3.978093362 | 0.73400463   | 0.184511665       | 1.663249534 | 3.1670754  |
| 10199 | AGI_HUM1_OLIGO_A_23_P216522 | <a href="#">C9orf127 ^ Chromosome 9 open reading frame 127 ^ 51754</a>                             | 3.975728701 | 1.391666667  | 0.350040652       | 2.623816209 | 3.1670754  |
| 18616 | AGI_HUM1_OLIGO_A_23_P46785  | <a href="#">SFTPD ^ Surfactant, pulmonary-associated protein D ^ 6441</a>                          | 3.974308741 | 2.391296296  | 0.601688609       | 5.246285412 | 3.1670754  |
| 38999 | AGI_OLIGO_NM_012258_2_2110  | <a href="#">HEY1 ^ Hairy/enhancer-of-split related with YRPW motif 1 ^ 23462</a>                   | 3.971612023 | 1.954333333  | 0.492075591       | 3.875368054 | 3.1670754  |
| 18123 | AGI_HUM1_OLIGO_A_23_P432583 | <a href="#">OAZ3 ^ Ornithine decarboxylase antizyme 3 ^ 51686</a>                                  | 3.956702495 | 1.324166667  | 0.334664198       | 2.50388216  | 3.1670754  |
| 9737  | AGI_HUM1_OLIGO_A_23_P212728 | <a href="#">FLJ11046 ^ Hypothetical protein FLJ11046 ^ 55773</a>                                   | 3.953632508 | 1.062333333  | 0.268698047       | 2.0883063   | 3.1670754  |
| 8295  | AGI_HUM1_OLIGO_A_23_P201268 | <a href="#">^ ^</a>                                                                                | 3.950856796 | 2.132759259  | 0.53982196        | 4.385554481 | 3.1670754  |
| 23335 | AGI_HUM1_OLIGO_A_23_P88819  | <a href="#">MVP ^ Major vault protein ^ 9961</a>                                                   | 3.950402393 | 0.991333333  | 0.250949          | 1.988021464 | 3.1670754  |
| 38023 | AGI_OLIGO_NM_002182_2_4101  | <a href="#">IL1RAP ^ Interleukin 1 receptor accessory protein ^ 3556</a>                           | 3.949935    | 1.632488889  | 0.413295127       | 3.10047421  | 3.1670754  |
| 6737  | AGI_HUM1_OLIGO_A_23_P161507 | <a href="#">MTL5 ^ Metallothionein-like 5, testis-specific (tesmin) ^ 9633</a>                     | 3.948568817 | 3.007333333  | 0.761626167       | 8.040768161 | 3.1670754  |
| 9973  | AGI_HUM1_OLIGO_A_23_P214663 | <a href="#">RPS18 ^ Ribosomal protein S18 ^ 6222</a>                                               | 3.946508209 | 1.393333333  | 0.353054716       | 2.626849112 | 3.1670754  |
| 797   | AGI_HUM1_OLIGO_A_23_P106952 | <a href="#">MYO15B ^ Myosin XVb, pseudogene ^ 80022</a>                                            | 3.939582214 | 1.135        | 0.288101615       | 2.196185628 | 3.1670754  |
| 11916 | AGI_HUM1_OLIGO_A_23_P259065 | <a href="#">^ ^</a>                                                                                | 3.935003414 | 1.417666667  | 0.360270759       | 2.671530831 | 3.1670754  |
| 8346  | AGI_HUM1_OLIGO_A_23_P201672 | <a href="#">KIAA0859 ^ KIAA0859 ^ 51603</a>                                                        | 3.934628108 | 0.947666667  | 0.240852919       | 1.928750682 | 3.1670754  |
| 4142  | AGI_HUM1_OLIGO_A_23_P138034 | <a href="#">FLJ14525 ^ Hypothetical protein FLJ14525 ^ 84886</a>                                   | 3.930465544 | 0.86         | 0.218803597       | 1.815038311 | 3.1670754  |
| 5227  | AGI_HUM1_OLIGO_A_23_P14774  | <a href="#">CTSH ^ Cathepsin H ^ 1512</a>                                                          | 3.929223381 | 1.382666667  | 0.351893118       | 2.607498941 | 3.1670754  |
| 9964  | AGI_HUM1_OLIGO_A_23_P214594 | <a href="#">RPP21 ^ Ribonuclease P 21kDa subunit ^ 79897</a>                                       | 3.929185375 | 0.683        | 0.17382738        | 1.605474777 | 3.1670754  |
| 2706  | AGI_HUM1_OLIGO_A_23_P124912 | <a href="#">NPEPPS ^ Aminopeptidase puromycin sensitive ^ 9520</a>                                 | 3.928557139 | 1.150333333  | 0.292813186       | 2.219651733 | 3.1670754  |
| 14410 | AGI_HUM1_OLIGO_A_23_P34548  | <a href="#">SDCCAG8 ^ Serologically defined colon cancer antigen 8 ^ 10806</a>                     | 3.925769176 | 1.650159259  | 0.420340368       | 3.138682852 | 3.1670754  |
| 24798 | AGI_HUM1_OLIGO_A_24_P113341 | <a href="#">C19orf12 ^ Chromosome 19 open reading frame 12 ^ 83636</a>                             | 3.924122442 | 0.762        | 0.194183543       | 1.695839929 | 3.1670754  |
| 29200 | AGI_HUM1_OLIGO_A_24_P383076 | <a href="#">AASDH ^ 2-aminoadipic 6-semialdehyde dehydrogenase ^ 132949</a>                        | 3.923379202 | 0.561333333  | 0.143073943       | 1.475632361 | 3.1670754  |
| 8929  | AGI_HUM1_OLIGO_A_23_P206280 | <a href="#">GPR56 ^ G protein-coupled receptor 56 ^ 9289</a>                                       | 3.921272194 | 0.606666667  | 0.154711695       | 1.522736872 | 3.1670754  |
| 1616  | AGI_HUM1_OLIGO_A_23_P114921 | <a href="#">SELL ^ Selectin L (lymphocyte adhesion molecule 1) ^ 6402</a>                          | 3.92120957  | 0.719595238  | 0.183513588       | 1.646719967 | 3.1670754  |
| 3165  | AGI_HUM1_OLIGO_A_23_P129064 | <a href="#">GATM ^ Glycine amidinotransferase (L-arginine:glycine amidinotransferase) ^ 2628</a>   | 3.919336656 | 2.07         | 0.528150598       | 4.198866734 | 3.1670754  |
| 12116 | AGI_HUM1_OLIGO_A_23_P26843  | <a href="#">SOX9 ^ SRY (sex determining region Y)-box 9 (campomelic dysplasia, autosomal sex-r</a> | 3.918319853 | 0.903333333  | 0.230540989       | 1.870382496 | 3.1670754  |
| 20237 | AGI_HUM1_OLIGO_A_23_P5983   | <a href="#">PLTP ^ Phospholipid transfer protein ^ 5360</a>                                        | 3.917102069 | 2.603        | 0.664521872       | 6.075486759 | 3.1670754  |
| 15714 | AGI_HUM1_OLIGO_A_23_P375494 | <a href="#">CEBPA ^ CCAAT/enhancer binding protein (C/EBP), alpha ^ 1050</a>                       | 3.914253769 | 2.742        | 0.700516666       | 6.689971199 | 3.1670754  |
| 24975 | AGI_HUM1_OLIGO_A_24_P12435  | <a href="#">NCOA7 ^ Nuclear receptor coactivator 7 ^ 135112</a>                                    | 3.912570452 | 1.949333333  | 0.49822319        | 3.861960299 | 3.1670754  |
| 12117 | AGI_HUM1_OLIGO_A_23_P26847  | <a href="#">SOX9 ^ SRY (sex determining region Y)-box 9 (campomelic dysplasia, autosomal sex-r</a> | 3.906480398 | 1.538333333  | 0.393790107       | 2.904587585 | 3.1670754  |
| 9340  | AGI_HUM1_OLIGO_A_23_P209564 | <a href="#">CYBRD1 ^ Cytochrome b reductase 1 ^ 79901</a>                                          | 3.905751496 | 2.418333333  | 0.61917235        | 5.345531251 | 3.1670754  |
| 21844 | AGI_HUM1_OLIGO_A_23_P74852  | <a href="#">^ ^</a>                                                                                | 3.900377852 | 1.772666667  | 0.454485882       | 3.416849413 | 3.1670754  |
| 15075 | AGI_HUM1_OLIGO_A_23_P360754 | <a href="#">ADAMTS4 ^ A disintegrin-like and metalloprotease (reprolysin type) with thrombospc</a> | 3.897826095 | 1.761333333  | 0.451875812       | 3.390112932 | 3.1670754  |
| 9243  | AGI_HUM1_OLIGO_A_23_P208798 | <a href="#">^ ^</a>                                                                                | 3.897096062 | 2.835666667  | 0.727635814       | 7.138726185 | 3.1670754  |
| 22090 | AGI_HUM1_OLIGO_A_23_P77073  | <a href="#">SPPL2A ^ Putative intramembrane cleaving protease ^ 84888</a>                          | 3.895786203 | 0.878666667  | 0.225542835       | 1.838675219 | 3.1670754  |
| 38105 | AGI_OLIGO_NM_002467_1_1814  | <a href="#">MYC ^ V-myc myelocytomatosis viral oncogene homolog (avian) ^ 4609</a>                 | 3.895523372 | 1.803333333  | 0.462924532       | 3.490257151 | 3.1670754  |
| 13407 | AGI_HUM1_OLIGO_A_23_P320897 | <a href="#">FLJ20054 ^ Family with sequence similarity 31, member B ^ 54530</a>                    | 3.894935987 | 1.127666667  | 0.289521232       | 2.185050566 | 3.1670754  |
| 37812 | AGI_OLIGO_NM_001353_4_343   | <a href="#">AKR1C1 ^ Aldo-keto reductase family 1, member C2 (dihydrodiol dehydrogenase 2; b</a>   | 3.894649047 | 1.050333333  | 0.269686259       | 2.071008297 | 3.1670754  |
| 8226  | AGI_HUM1_OLIGO_A_23_P200685 | <a href="#">FLJ20605 ^ Hypothetical protein FLJ20605 ^ 54996</a>                                   | 3.89434352  | 1.363666667  | 0.350165993       | 2.573383848 | 3.1670754  |
| 22636 | AGI_HUM1_OLIGO_A_23_P82088  | <a href="#">NRN1 ^ Neuritin 1 ^ 51299</a>                                                          | 3.887631687 | 2.067666667  | 0.531857653       | 4.192081214 | 3.24859346 |
| 36344 | AGI_OLIGO_AK054814_1_1650   | <a href="#">MEIS4 ^ Meis1, myeloid ecotropic viral integration site 1 homolog 4 (mouse) ^ 4213</a> | 3.887017769 | 2.293        | 0.589912405       | 4.900741328 | 3.24859346 |
| 29185 | AGI_HUM1_OLIGO_A_24_P382319 | <a href="#">CEACAM1 ^ Carcinoembryonic antigen-related cell adhesion molecule 1 (biliary glyco</a> | 3.886283959 | 3.320666667  | 0.854458064       | 9.991260267 | 3.24859346 |
| 719   | AGI_HUM1_OLIGO_A_23_P106194 | <a href="#">FOS ^ V-fos FBJ murine osteosarcoma viral oncogene homolog ^ 2353</a>                  | 3.886004555 | 3.13         | 0.805454537       | 8.75434961  | 3.24859346 |



Supplementary Table S1. SAM between Lung mets and Parental models microarrays

List of Significant Genes for Delta = 1.311: Positive genes (934) and Negative genes (297)

| Row   | Gene ID                     | Gene Name                                                                                       | Score(d)    | Numerator(r) | Denominator(s+s0) | Fold Change | q-value(%) |
|-------|-----------------------------|-------------------------------------------------------------------------------------------------|-------------|--------------|-------------------|-------------|------------|
| 38146 | AGI_OLIGO_NM_002634_2_1767  | <a href="#">PHB ^ Prohibitin ^ 5245</a>                                                         | 3.884171431 | 1.015666667  | 0.26148863        | 2.021836964 | 3.24859346 |
| 28799 | AGI_HUM1_OLIGO_A_24_P359020 | <a href="#">FLJ22789 ^ Hypothetical protein FLJ22789 ^ 84190</a>                                | 3.883835975 | 0.782037037  | 0.201356865       | 1.719557117 | 3.24859346 |
| 3982  | AGI_HUM1_OLIGO_A_23_P136492 | <a href="#">PDGFA ^ Platelet-derived growth factor alpha polypeptide ^ 5154</a>                 | 3.883738213 | 1.346666667  | 0.346744964       | 2.543238333 | 3.24859346 |
| 36718 | AGI_OLIGO_AL832719_1_4052   | <a href="#">GCNT2 ^ Glucosaminyl (N-acetyl) transferase 2, I-branching enzyme ^ 2651</a>        | 3.880316998 | 1.014333333  | 0.26140476        | 2.019969253 | 3.24859346 |
| 37998 | AGI_OLIGO_NM_002053_1_2774  | <a href="#">GBP1 ^ Guanylate binding protein 1, interferon-inducible, 67kDa ^ 2633</a>          | 3.878217365 | 1.985666667  | 0.512004996       | 3.960456322 | 3.24859346 |
| 39503 | AGI_OLIGO_NM_024843_2_3641  | <a href="#">CYBRD1 ^ Cytochrome b reductase 1 ^ 79901</a>                                       | 3.876302899 | 1.533666667  | 0.395651915       | 2.895207333 | 3.24859346 |
| 19756 | AGI_HUM1_OLIGO_A_23_P55568  | <a href="#">CLUL1 ^ Clusterin-like 1 (retinal) ^ 27098</a>                                      | 3.874632014 | 1.925888889  | 0.497050786       | 3.799708881 | 3.24859346 |
| 12856 | AGI_HUM1_OLIGO_A_23_P308763 | <a href="#">FARP1 ^ FERM, RhoGEF (ARHGEF) and pleckstrin domain protein 1 (chondrocyte-deri</a> | 3.874486953 | 2.533666667  | 0.653936043       | 5.790414665 | 3.24859346 |
| 33000 | AGI_HUM1_OLIGO_A_32_P129950 | <a href="#">^ ^</a>                                                                             | 3.873350547 | 0.785666667  | 0.20283903        | 1.723888741 | 3.24859346 |
| 17653 | AGI_HUM1_OLIGO_A_23_P421512 | <a href="#">LOC220594 ^ TL132 protein ^ 220594</a>                                              | 3.869818309 | 1.313666667  | 0.339464688       | 2.485724947 | 3.24859346 |
| 38760 | AGI_OLIGO_NM_005842_2_2014  | <a href="#">SPRY2 ^ Sprouty homolog 2 (Drosophila) ^ 10253</a>                                  | 3.866511238 | 2.236666667  | 0.578471529       | 4.713068555 | 3.24859346 |
| 35132 | AGI_HUM1_OLIGO_A_32_P49764  | <a href="#">^ ^</a>                                                                             | 3.865612745 | 2.408333333  | 0.62301464        | 5.308606969 | 3.24859346 |
| 38799 | AGI_OLIGO_NM_006117_1_1269  | <a href="#">PECI ^ Peroxisomal D3,D2-enoyl-CoA isomerase ^ 10455</a>                            | 3.861358893 | 3.651        | 0.945522056       | 12.5620499  | 3.24859346 |
| 28420 | AGI_HUM1_OLIGO_A_24_P336848 | <a href="#">ACYP2 ^ Acylphosphatase 2, muscle type ^ 98</a>                                     | 3.85818317  | 1.413666667  | 0.366407349       | 2.664134033 | 3.24859346 |
| 8329  | AGI_HUM1_OLIGO_A_23_P201551 | <a href="#">VAV3 ^ Vav 3 oncogene ^ 10451</a>                                                   | 3.857494108 | 2.61         | 0.676605052       | 6.105036836 | 3.24859346 |
| 36085 | AGI_OLIGO_AB051469_1_4430   | <a href="#">PIP3AP ^ Phosphatidylinositol-3-phosphate associated protein ^ 54545</a>            | 3.855550015 | 0.659666667  | 0.171095347       | 1.579717589 | 3.24859346 |
| 35684 | AGI_HUM1_OLIGO_A_32_P84092  | <a href="#">^ ^</a>                                                                             | 3.849715127 | 1.523100529  | 0.395639802       | 2.874080616 | 3.24859346 |
| 24947 | AGI_HUM1_OLIGO_A_24_P122732 | <a href="#">SLC41A1 ^ Solute carrier family 41, member 1 ^ 254428</a>                           | 3.847736747 | 1.162333333  | 0.302082343       | 2.238191274 | 3.24859346 |
| 13675 | AGI_HUM1_OLIGO_A_23_P327307 | <a href="#">PAK2 ^ P21 (CDKN1A)-activated kinase 2 ^ 5062</a>                                   | 3.847496023 | 1.161333333  | 0.301841334       | 2.236640416 | 3.24859346 |
| 24281 | AGI_HUM1_OLIGO_A_23_P97621  | <a href="#">RRAGC ^ Ras-related GTP binding C ^ 64121</a>                                       | 3.845575099 | 1.221666667  | 0.317681136       | 2.332159834 | 3.24859346 |
| 11501 | AGI_HUM1_OLIGO_A_23_P255358 | <a href="#">FOXI1 ^ Forkhead box I1 ^ 2299</a>                                                  | 3.845394546 | 1.178085185  | 0.30636263        | 2.262762529 | 3.24859346 |
| 36632 | AGI_OLIGO_AL137502_1_3951   | <a href="#">RRAGD ^ Ras-related GTP binding D ^ 58528</a>                                       | 3.843376669 | 1.536        | 0.399648573       | 2.899893666 | 3.24859346 |
| 8105  | AGI_HUM1_OLIGO_A_23_P19611  | <a href="#">^ ^</a>                                                                             | 3.843273991 | 2.266        | 0.589601471       | 4.809876996 | 3.24859346 |
| 29429 | AGI_HUM1_OLIGO_A_24_P398147 | <a href="#">NEBL ^ Nebulette ^ 10529</a>                                                        | 3.839032874 | 2.5825       | 0.672695464       | 5.989767483 | 3.24859346 |
| 18354 | AGI_HUM1_OLIGO_A_23_P44195  | <a href="#">MSI2 ^ Musashi homolog 2 (Drosophila) ^ 124540</a>                                  | 3.838099702 | 0.832333333  | 0.21686079        | 1.780562816 | 3.24859346 |
| 9919  | AGI_HUM1_OLIGO_A_23_P214222 | <a href="#">MARCKS ^ Myristoylated alanine-rich protein kinase C substrate ^ 4082</a>           | 3.835250112 | 1.707333333  | 0.445168707       | 3.265566604 | 3.24859346 |
| 3691  | AGI_HUM1_OLIGO_A_23_P133712 | <a href="#">CYP39A1 ^ Cytochrome P450, family 39, subfamily A, polypeptide 1 ^ 51302</a>        | 3.834321182 | 1.451333333  | 0.378511153       | 2.734606659 | 3.24859346 |
| 5030  | AGI_HUM1_OLIGO_A_23_P145874 | <a href="#">C7orf6 ^ Chromosome 7 open reading frame 6 ^ 219285</a>                             | 3.822437193 | 0.9478       | 0.247956985       | 1.928928944 | 3.24859346 |
| 29813 | AGI_HUM1_OLIGO_A_24_P419250 | <a href="#">RASAL2 ^ RAS protein activator like 2 ^ 9462</a>                                    | 3.822158073 | 2.514666667  | 0.657918019       | 5.714656041 | 3.24859346 |
| 10272 | AGI_HUM1_OLIGO_A_23_P217109 | <a href="#">SLC31A2 ^ Solute carrier family 31 (copper transporters), member 2 ^ 1318</a>       | 3.820546221 | 1.049666667  | 0.274742565       | 2.070051509 | 3.24859346 |
| 29519 | AGI_HUM1_OLIGO_A_24_P402690 | <a href="#">ITM2C ^ Integral membrane protein 2C ^ 81618</a>                                    | 3.819765035 | 1.329333333  | 0.348014425       | 2.51286529  | 3.24859346 |
| 38528 | AGI_OLIGO_NM_004615_2_1471  | <a href="#">TM4SF2 ^ Transmembrane 4 superfamily member 2 ^ 7102</a>                            | 3.818496562 | 1.970333333  | 0.515997147       | 3.918586471 | 3.24859346 |
| 32527 | AGI_HUM1_OLIGO_A_24_P98021  | <a href="#">MAP7 ^ Microtubule-associated protein 7 ^ 9053</a>                                  | 3.817495594 | 0.686333333  | 0.17978628        | 1.6091885   | 3.24859346 |
| 24705 | AGI_HUM1_OLIGO_A_24_P107941 | <a href="#">FLJ13154 ^ Hypothetical protein FLJ13154 ^ 79650</a>                                | 3.815254847 | 1.174666667  | 0.307886816       | 2.257407178 | 3.24859346 |
| 9645  | AGI_HUM1_OLIGO_A_23_P212025 | <a href="#">FLJ35036 ^ Hypothetical protein FLJ35036 ^ 253461</a>                               | 3.814656204 | 1.55         | 0.406327574       | 2.928171392 | 3.24859346 |
| 8045  | AGI_HUM1_OLIGO_A_23_P19102  | <a href="#">GALNT10 ^ UDP-N-acetyl-alpha-D-galactosamine:polypeptide N-acetylgalactosaminy</a>  | 3.813033036 | 0.710666667  | 0.186378314       | 1.636560194 | 3.24859346 |
| 27030 | AGI_HUM1_OLIGO_A_24_P250650 | <a href="#">RABL2A ^ RAB, member of RAS oncogene family-like 2A ^ 11159</a>                     | 3.812608472 | 0.668666667  | 0.175382988       | 1.589603183 | 3.24859346 |
| 7029  | AGI_HUM1_OLIGO_A_23_P164089 | <a href="#">RFFL ^ Fring ^ 117584</a>                                                           | 3.808954459 | 0.693333333  | 0.182027205       | 1.617015304 | 3.24859346 |
| 36591 | AGI_OLIGO_AK098572_1_986    | <a href="#">PABPC1 ^ Poly(A) binding protein, cytoplasmic 1 ^ 26986</a>                         | 3.805969225 | 1.274        | 0.334737336       | 2.418311352 | 3.24859346 |
| 20139 | AGI_HUM1_OLIGO_A_23_P59005  | <a href="#">TAP1 ^ Transporter 1, ATP-binding cassette, sub-family B (MDR/TAP) ^ 6890</a>       | 3.805240876 | 2.012333333  | 0.52883205        | 4.034341843 | 3.24859346 |
| 33014 | AGI_HUM1_OLIGO_A_32_P131377 | <a href="#">C5orf18 ^ Chromosome 5 open reading frame 18 ^ 7905</a>                             | 3.798021035 | 1.577333333  | 0.415304001       | 2.984177465 | 3.24859346 |
| 20045 | AGI_HUM1_OLIGO_A_23_P58137  | <a href="#">^ ^</a>                                                                             | 3.796621961 | 2.773333333  | 0.730473922       | 6.836857394 | 3.24859346 |
| 33533 | AGI_HUM1_OLIGO_A_32_P168326 | <a href="#">^ ^</a>                                                                             | 3.792592702 | 2.621851852  | 0.691308574       | 6.15539676  | 3.24859346 |
| 20485 | AGI_HUM1_OLIGO_A_23_P62188  | <a href="#">KIAA1166 ^ KIAA1166 ^ 55906</a>                                                     | 3.792136515 | 0.988333333  | 0.260627045       | 1.983891785 | 3.24859346 |
| 38735 | AGI_OLIGO_NM_005620_1_319   | <a href="#">S100A11 ^ S100 calcium binding protein A11 (calgizzarin) ^ 6282</a>                 | 3.791484419 | 1.739666667  | 0.458835241       | 3.339579982 | 3.24859346 |
| 20883 | AGI_HUM1_OLIGO_A_23_P65967  | <a href="#">FLJ10815 ^ Amino acid transporter ^ 55238</a>                                       | 3.787717331 | 1.058666667  | 0.279499914       | 2.083005526 | 3.24859346 |

Supplementary Table S1. SAM between Lung mets and Parental models microarrays

List of Significant Genes for Delta = 1.311: **Positive genes (934)** and **Negative genes (297)**

| Row   | Gene ID                     | Gene Name                                                                                                             | Score(d)    | Numerator(r) | Denominator(s+s0) | Fold Change | q-value(%) |
|-------|-----------------------------|-----------------------------------------------------------------------------------------------------------------------|-------------|--------------|-------------------|-------------|------------|
| 8767  | AGI_HUM1_OLIGO_A_23_P205046 | <a href="#">ANKRD10 ^ Ankyrin repeat domain 10 ^ 55608</a>                                                            | 3.787374066 | 0.947333333  | 0.250129329       | 1.928305097 | 3.24859346 |
| 1843  | AGI_HUM1_OLIGO_A_23_P117104 | <a href="#">AQP5 ^ Aquaporin 5 ^ 362</a>                                                                              | 3.787358868 | 2.026666667  | 0.535113449       | 4.07462324  | 3.24859346 |
| 26170 | AGI_HUM1_OLIGO_A_24_P197537 | <a href="#">PDE8B ^ Phosphodiesterase 8B ^ 8622</a>                                                                   | 3.786217842 | 1.604        | 0.423641763       | 3.039849713 | 3.24859346 |
| 7202  | AGI_HUM1_OLIGO_A_23_P165636 | <a href="#">CAPG ^ Capping protein (actin filament), gelsolin-like ^ 822</a>                                          | 3.785873985 | 0.974666667  | 0.257448259       | 1.96518709  | 3.24859346 |
| 15964 | AGI_HUM1_OLIGO_A_23_P381431 | <a href="#">NPL ^ N-acetylneuraminatase pyruvate lyase (dihydrodipicolinate synthase) ^ 80896</a>                     | 3.785294025 | 1.894        | 0.500357433       | 3.716642697 | 3.24859346 |
| 3970  | AGI_HUM1_OLIGO_A_23_P136355 | <a href="#">HHAT ^ Hedgehog acyltransferase ^ 55733</a>                                                               | 3.784877473 | 1.803333333  | 0.47645752        | 3.490257151 | 3.24859346 |
| 11677 | AGI_HUM1_OLIGO_A_23_P256988 | <a href="#">ACY2 ^ Acylphosphatase 2, muscle type ^ 98</a>                                                            | 3.781951813 | 1.686333333  | 0.445889693       | 3.218377001 | 3.24859346 |
| 37503 | AGI_OLIGO_NM_000196_1_1728  | <a href="#">HSD11B2 ^ Hydroxysteroid (11-beta) dehydrogenase 2 ^ 3291</a>                                             | 3.78092149  | 1.654        | 0.437459493       | 3.147049781 | 3.24859346 |
| 18311 | AGI_HUM1_OLIGO_A_23_P43810  | <a href="#">LTBP1 ^ Latent transforming growth factor beta binding protein 1 ^ 4052</a>                               | 3.776947985 | 1.223666667  | 0.323982928       | 2.335395136 | 3.24859346 |
| 33782 | AGI_HUM1_OLIGO_A_32_P186678 | <a href="#">^ ^</a>                                                                                                   | 3.776898158 | 1.379        | 0.365114425       | 2.600880293 | 3.24859346 |
| 38514 | AGI_OLIGO_NM_004529_1_3293  | <a href="#">MLLT3 ^ Myeloid/lymphoid or mixed-lineage leukemia (trithorax homolog, Drosophila)</a>                    | 3.76994941  | 1.095946429  | 0.290705871       | 2.137532608 | 3.24859346 |
| 8610  | AGI_HUM1_OLIGO_A_23_P203833 | <a href="#">HRB2 ^ HIV-1 rev binding protein 2 ^ 11103</a>                                                            | 3.766409004 | 1.033333333  | 0.274355051       | 2.046747784 | 3.24859346 |
| 16887 | AGI_HUM1_OLIGO_A_23_P403424 | <a href="#">PLA2G4B ^ Phospholipase A2, group IVB (cytosolic) ^ 8681</a>                                              | 3.765904874 | 0.783666667  | 0.208095184       | 1.72150058  | 3.24859346 |
| 38825 | AGI_OLIGO_NM_006271_1_526   | <a href="#">S100A1 ^ S100 calcium binding protein A1 ^ 6271</a>                                                       | 3.764439371 | 2.114        | 0.561571005       | 4.328898578 | 3.24859346 |
| 38736 | AGI_OLIGO_NM_005620_1_531   | <a href="#">S100A11 ^ S100 calcium binding protein A11 (calgizzarin) ^ 6282</a>                                       | 3.763068591 | 0.979333333  | 0.2602486         | 1.971554147 | 3.24859346 |
| 9518  | AGI_HUM1_OLIGO_A_23_P211039 | <a href="#">ADAMTS1 ^ A disintegrin-like and metalloprotease (reprolysin type) with thrombospondin type 1 motifs</a>  | 3.760335856 | 2.325        | 0.618295835       | 5.010657754 | 3.24859346 |
| 11727 | AGI_HUM1_OLIGO_A_23_P257423 | <a href="#">MGC19780 ^ Hypothetical protein MGC19780 ^ 199857</a>                                                     | 3.758273308 | 0.761666667  | 0.202663991       | 1.695448152 | 3.24859346 |
| 7082  | AGI_HUM1_OLIGO_A_23_P164536 | <a href="#">PIK3C3 ^ Phosphoinositide-3-kinase, class 3 ^ 5289</a>                                                    | 3.756236102 | 0.695        | 0.185025643       | 1.618884433 | 3.24859346 |
| 24022 | AGI_HUM1_OLIGO_A_23_P95184  | <a href="#">PSCD1 ^ Pleckstrin homology, Sec7 and coiled-coil domains 1 (cytohesin 1) ^ 9267</a>                      | 3.756107444 | 0.886666667  | 0.236059985       | 1.84889932  | 3.24859346 |
| 22554 | AGI_HUM1_OLIGO_A_23_P81248  | <a href="#">TAF7 ^ TAF7 RNA polymerase II, TATA box binding protein (TBP)-associated factor, 55</a>                   | 3.75493722  | 1.103666667  | 0.293924133       | 2.149001764 | 3.24859346 |
| 3177  | AGI_HUM1_OLIGO_A_23_P129157 | <a href="#">NEIL1 ^ Nei endonuclease VIII-like 1 (E. coli) ^ 79661</a>                                                | 3.751029044 | 1.171666667  | 0.31235873        | 2.252717909 | 3.24859346 |
| 15402 | AGI_HUM1_OLIGO_A_23_P368724 | <a href="#">TFEB ^ Transcription factor EB ^ 7942</a>                                                                 | 3.746862048 | 1.045666667  | 0.279077973       | 2.064320057 | 3.24859346 |
| 14641 | AGI_HUM1_OLIGO_A_23_P350886 | <a href="#">KIAA0240 ^ KIAA0240 ^ 23506</a>                                                                           | 3.740228051 | 1.239666667  | 0.331441465       | 2.361439651 | 3.62118    |
| 33058 | AGI_HUM1_OLIGO_A_32_P134657 | <a href="#">KIAA0240 ^ KIAA0240 ^ 23506</a>                                                                           | 3.738947262 | 1.578        | 0.422043931       | 2.985556767 | 3.62118    |
| 21126 | AGI_HUM1_OLIGO_A_23_P68155  | <a href="#">IFIH1 ^ Interferon induced with helicase C domain 1 ^ 64135</a>                                           | 3.738909063 | 1.298333333  | 0.347249241       | 2.459445922 | 3.62118    |
| 10486 | AGI_HUM1_OLIGO_A_23_P218811 | <a href="#">CPT1B ^ Carnitine palmitoyltransferase 1B (muscle) ^ 1375</a>                                             | 3.736350942 | 1.100333333  | 0.294494107       | 2.144042247 | 3.62118    |
| 1850  | AGI_HUM1_OLIGO_A_23_P117172 | <a href="#">PARP4 ^ Poly (ADP-ribose) polymerase family, member 4 ^ 143</a>                                           | 3.73610294  | 1.147        | 0.307004389       | 2.214529169 | 3.62118    |
| 12003 | AGI_HUM1_OLIGO_A_23_P259851 | <a href="#">ADAMTS19 ^ A disintegrin-like and metalloprotease (reprolysin type) with thrombospondin type 1 motifs</a> | 3.734186305 | 1.117068783  | 0.299146505       | 2.169058229 | 3.62118    |
| 1716  | AGI_HUM1_OLIGO_A_23_P115885 | <a href="#">MINPP1 ^ Multiple inositol polyphosphate histidine phosphatase, 1 ^ 9562</a>                              | 3.728585683 | 0.641407407  | 0.172024318       | 1.559850114 | 3.62118    |
| 15399 | AGI_HUM1_OLIGO_A_23_P368711 | <a href="#">LILRB3 ^ Leukocyte immunoglobulin-like receptor, subfamily B (with TM and ITIM domains)</a>               | 3.727644309 | 0.798541667  | 0.21422153        | 1.739342042 | 3.62118    |
| 12299 | AGI_HUM1_OLIGO_A_23_P28485  | <a href="#">GCA ^ Grancalcin, EF-hand calcium binding protein ^ 25801</a>                                             | 3.726338527 | 1.142666667  | 0.306645963       | 2.207887505 | 3.62118    |
| 36541 | AGI_OLIGO_AK096260_1_2862   | <a href="#">TMEM25 ^ Transmembrane protein 25 ^ 84866</a>                                                             | 3.726191638 | 1.127666667  | 0.302632493       | 2.185050566 | 3.62118    |
| 1144  | AGI_HUM1_OLIGO_A_23_P110191 | <a href="#">HERC5 ^ Hect domain and RLD 5 ^ 51191</a>                                                                 | 3.721135351 | 1.321        | 0.35499918        | 2.498392251 | 3.62118    |
| 2401  | AGI_HUM1_OLIGO_A_23_P121926 | <a href="#">SEPP1 ^ Selenoprotein P, plasma, 1 ^ 6414</a>                                                             | 3.719504336 | 3.217666667  | 0.865079424       | 9.302810678 | 3.62118    |
| 35048 | AGI_HUM1_OLIGO_A_32_P460973 | <a href="#">HLA-E ^ Major histocompatibility complex, class I, E ^ 3133</a>                                           | 3.718532005 | 1.829333333  | 0.491950407       | 3.553728174 | 3.62118    |
| 2647  | AGI_HUM1_OLIGO_A_23_P124242 | <a href="#">MAGED1 ^ Melanoma antigen, family D, 1 ^ 9500</a>                                                         | 3.717966275 | 0.575333333  | 0.154744097       | 1.490021691 | 3.62118    |
| 32437 | AGI_HUM1_OLIGO_A_24_P944390 | <a href="#">WWTR1 ^ WW domain containing transcription regulator 1 ^ 25937</a>                                        | 3.715620208 | 1.255666667  | 0.337942684       | 2.387774617 | 3.62118    |
| 15419 | AGI_HUM1_OLIGO_A_23_P368934 | <a href="#">KIAA1545 ^ KIAA1545 protein ^ 57666</a>                                                                   | 3.713525436 | 1.057        | 0.284635185       | 2.080600533 | 3.62118    |
| 22626 | AGI_HUM1_OLIGO_A_23_P81999  | <a href="#">TEAD3 ^ TEA domain family member 3 ^ 7005</a>                                                             | 3.712599798 | 1.110666667  | 0.299161431       | 2.159454122 | 3.62118    |
| 18644 | AGI_HUM1_OLIGO_A_23_P47004  | <a href="#">DHX32 ^ DEAH (Asp-Glu-Ala-His) box polypeptide 32 ^ 55760</a>                                             | 3.70901172  | 1.484        | 0.400106582       | 2.797232165 | 3.62118    |
| 30925 | AGI_HUM1_OLIGO_A_24_P754185 | <a href="#">^ ^</a>                                                                                                   | 3.699173041 | 0.631666667  | 0.170758886       | 1.549353844 | 3.62118    |
| 5125  | AGI_HUM1_OLIGO_A_23_P146744 | <a href="#">MTA1 ^ Metastasis associated 1 ^ 9112</a>                                                                 | 3.698720153 | 0.818666667  | 0.221337823       | 1.763775165 | 3.62118    |
| 15358 | AGI_HUM1_OLIGO_A_23_P367618 | <a href="#">ZIC1 ^ Zic family member 1 (odd-paired homolog, Drosophila) ^ 7545</a>                                    | 3.696240946 | 1.965666667  | 0.531801551       | 3.90593155  | 3.62118    |
| 38317 | AGI_OLIGO_NM_003506_1_3181  | <a href="#">FZD6 ^ Frizzled homolog 6 (Drosophila) ^ 8323</a>                                                         | 3.696053533 | 0.736        | 0.199131315       | 1.665551542 | 3.62118    |
| 31016 | AGI_HUM1_OLIGO_A_24_P78540  | <a href="#">NR2C1 ^ Nuclear receptor subfamily 2, group C, member 1 ^ 7181</a>                                        | 3.694163437 | 0.379333333  | 0.102684502       | 1.300740647 | 3.62118    |
| 38854 | AGI_OLIGO_NM_006393_1_7823  | <a href="#">NEBL ^ Nebulette ^ 10529</a>                                                                              | 3.692621548 | 2.228666667  | 0.603545919       | 4.687006081 | 3.62118    |

Supplementary Table S1. SAM between Lung mets and Parental models microarrays

List of Significant Genes for Delta = 1.311: Positive genes (934) and Negative genes (297)

| Row   | Gene ID                     | Gene Name                                                                                           | Score(d)    | Numerator(r) | Denominator(s+s0) | Fold Change | q-value(%) |
|-------|-----------------------------|-----------------------------------------------------------------------------------------------------|-------------|--------------|-------------------|-------------|------------|
| 7966  | AGI_HUM1_OLIGO_A_23_P18317  | <a href="#">SLC41A3 ^ Solute carrier family 41, member 3 ^ 54946</a>                                | 3.688060819 | 0.583333333  | 0.158168035       | 1.498307077 | 3.62118    |
| 12082 | AGI_HUM1_OLIGO_A_23_P26632  | <a href="#">PYCARD ^ PYD and CARD domain containing ^ 29108</a>                                     | 3.686908616 | 2.213333333  | 0.600322266       | 4.637455164 | 3.62118    |
| 16989 | AGI_HUM1_OLIGO_A_23_P406025 | <a href="#">^ ^</a>                                                                                 | 3.682991863 | 1.723566667  | 0.467980037       | 3.302518554 | 3.62118    |
| 10078 | AGI_HUM1_OLIGO_A_23_P215525 | <a href="#">OSBPL3 ^ Oxysterol binding protein-like 3 ^ 26031</a>                                   | 3.68248769  | 1.647333333  | 0.447342523       | 3.132540872 | 3.62118    |
| 39688 | AGI_OLIGO_NM_139177_1_2615  | <a href="#">^ ^</a>                                                                                 | 3.681312983 | 1.950333333  | 0.52979286        | 3.864638134 | 3.62118    |
| 6040  | AGI_HUM1_OLIGO_A_23_P155049 | <a href="#">APOL6 ^ Apolipoprotein L, 6 ^ 80830</a>                                                 | 3.678491193 | 1.081833333  | 0.29409703        | 2.116724242 | 3.62118    |
| 20253 | AGI_HUM1_OLIGO_A_23_P60000  | <a href="#">KIAA0103 ^ KIAA0103 ^ 9694</a>                                                          | 3.678308437 | 0.765666667  | 0.208157277       | 1.700155455 | 3.62118    |
| 10854 | AGI_HUM1_OLIGO_A_23_P24870  | <a href="#">CD44 ^ CD44 antigen (homing function and Indian blood group system) ^ 960</a>           | 3.677116526 | 1.136333333  | 0.309028372       | 2.198216272 | 3.62118    |
| 30222 | AGI_HUM1_OLIGO_A_24_P54900  | <a href="#">LNX ^ Ligand of numb-protein X ^ 84708</a>                                              | 3.6757873   | 2.108884259  | 0.573723147       | 4.313575655 | 3.62118    |
| 3682  | AGI_HUM1_OLIGO_A_23_P13364  | <a href="#">NUCB2 ^ Nucleobindin 2 ^ 4925</a>                                                       | 3.674835254 | 1.246666667  | 0.339244233       | 2.37292527  | 3.62118    |
| 8388  | AGI_HUM1_OLIGO_A_23_P202    | <a href="#">EPS15 ^ Epidermal growth factor receptor pathway substrate 15 ^ 2060</a>                | 3.674445517 | 0.952666667  | 0.259268143       | 1.935446819 | 3.62118    |
| 6551  | AGI_HUM1_OLIGO_A_23_P159797 | <a href="#">PNPLA4 ^ Patatin-like phospholipase domain containing 4 ^ 8228</a>                      | 3.669584397 | 1.016666667  | 0.277052264       | 2.023238881 | 3.62118    |
| 22715 | AGI_HUM1_OLIGO_A_23_P8281   | <a href="#">IFNGR1 ^ Interferon gamma receptor 1 ^ 3459</a>                                         | 3.668165342 | 0.507666667  | 0.138397978       | 1.421748879 | 3.62118    |
| 39806 | O_AL355708                  | <a href="#">NEO1 ^ Neogenin homolog 1 (chicken) ^ 4756</a>                                          | 3.667851929 | 1.063        | 0.289815407       | 2.089271526 | 3.62118    |
| 19650 | AGI_HUM1_OLIGO_A_23_P54649  | <a href="#">TRADD ^ TNFRSF1A-associated via death domain ^ 8717</a>                                 | 3.667823168 | 0.867333333  | 0.236470869       | 1.824287782 | 3.62118    |
| 4717  | AGI_HUM1_OLIGO_A_23_P143143 | <a href="#">ID2 ^ Inhibitor of DNA binding 2, dominant negative helix-loop-helix protein ^ 3398</a> | 3.664827816 | 1.844        | 0.503161429       | 3.590040203 | 3.62118    |
| 20763 | AGI_HUM1_OLIGO_A_23_P64860  | <a href="#">SELPLG ^ Selectin P ligand ^ 6404</a>                                                   | 3.662836822 | 1.102466667  | 0.300987109       | 2.147215017 | 3.62118    |
| 7930  | AGI_HUM1_OLIGO_A_23_P17998  | <a href="#">HES1 ^ Hairy and enhancer of split 1, (Drosophila) ^ 3280</a>                           | 3.662456451 | 2.189333333  | 0.597777301       | 4.560946772 | 3.62118    |
| 7034  | AGI_HUM1_OLIGO_A_23_P16412  | <a href="#">LRP3 ^ Low density lipoprotein receptor-related protein 3 ^ 4037</a>                    | 3.660446522 | 1.086333333  | 0.296776179       | 2.123336956 | 3.62118    |
| 27017 | AGI_HUM1_OLIGO_A_24_P249072 | <a href="#">BTN2A2 ^ Butyrophilin, subfamily 2, member A2 ^ 10385</a>                               | 3.658425514 | 1.212        | 0.331290058       | 2.316585612 | 3.62118    |
| 17599 | AGI_HUM1_OLIGO_A_23_P420331 | <a href="#">PGBD4 ^ PiggyBac transposable element derived 4 ^ 161779</a>                            | 3.658254084 | 1.117333333  | 0.305428029       | 2.169456011 | 3.62118    |
| 20988 | AGI_HUM1_OLIGO_A_23_P66867  | <a href="#">GEMIN4 ^ Gem (nuclear organelle) associated protein 4 ^ 50628</a>                       | 3.657859847 | 0.751333333  | 0.205402439       | 1.683347856 | 3.62118    |
| 10198 | AGI_HUM1_OLIGO_A_23_P216520 | <a href="#">C9orf127 ^ Chromosome 9 open reading frame 127 ^ 51754</a>                              | 3.653055854 | 1.24         | 0.33944184        | 2.361985323 | 3.62118    |
| 27077 | AGI_HUM1_OLIGO_A_24_P252846 | <a href="#">LOC119710 ^ Hypothetical protein BC009561 ^ 119710</a>                                  | 3.652384274 | 1.276        | 0.34936083        | 2.421666168 | 3.62118    |
| 26101 | AGI_HUM1_OLIGO_A_24_P193295 | <a href="#">RAB15 ^ RAB15, member RAS oncogene family ^ 376267</a>                                  | 3.651597854 | 0.666333333  | 0.182477195       | 1.587034327 | 3.62118    |
| 31026 | AGI_HUM1_OLIGO_A_24_P79040  | <a href="#">CAPN12 ^ Calpain 12 ^ 147968</a>                                                        | 3.650543723 | 1.003746032  | 0.274957954       | 2.005199851 | 3.62118    |
| 2459  | AGI_HUM1_OLIGO_A_23_P122464 | <a href="#">ZNF193 ^ Zinc finger protein 193 ^ 7746</a>                                             | 3.650317793 | 1.019666667  | 0.27933641        | 2.027450465 | 3.62118    |
| 5046  | AGI_HUM1_OLIGO_A_23_P146050 | <a href="#">FLJ14007 ^ Hypothetical protein FLJ14007 ^ 79752</a>                                    | 3.648245949 | 0.787        | 0.215720105       | 1.725482689 | 3.62118    |
| 8341  | AGI_HUM1_OLIGO_A_23_P201636 | <a href="#">LAMC2 ^ Laminin, gamma 2 ^ 3918</a>                                                     | 3.646468684 | 3.298666667  | 0.904619497       | 9.840056959 | 3.62118    |
| 38857 | AGI_OLIGO_NM_006406_1_788   | <a href="#">PRDX4 ^ Peroxiredoxin 4 ^ 10549</a>                                                     | 3.644108597 | 0.604        | 0.165746981       | 1.519924856 | 3.62118    |
| 20561 | AGI_HUM1_OLIGO_A_23_P62932  | <a href="#">ATP1B1 ^ ATPase, Na+/K+ transporting, beta 1 polypeptide ^ 481</a>                      | 3.642806315 | 1.133333333  | 0.311115452       | 2.193649959 | 3.62118    |
| 14881 | AGI_HUM1_OLIGO_A_23_P356425 | <a href="#">DKFZp686H1423 ^ Hypothetical protein FLJ32940 ^ 126859</a>                              | 3.642195602 | 0.55852381   | 0.153348109       | 1.472761491 | 3.62118    |
| 20254 | AGI_HUM1_OLIGO_A_23_P60002  | <a href="#">KIAA0103 ^ KIAA0103 ^ 9694</a>                                                          | 3.640566875 | 0.895666667  | 0.246023957       | 1.860469406 | 3.62118    |
| 37714 | AGI_OLIGO_NM_000919_2_3838  | <a href="#">PAM ^ Peptidylglycine alpha-amidating monooxygenase ^ 5066</a>                          | 3.640536306 | 2.649333333  | 0.727731606       | 6.273773015 | 3.62118    |
| 12450 | AGI_HUM1_OLIGO_A_23_P29763  | <a href="#">WWTR1 ^ WW domain containing transcription regulator 1 ^ 25937</a>                      | 3.640505715 | 1.336333333  | 0.367073544       | 2.525087416 | 3.62118    |
| 32300 | AGI_HUM1_OLIGO_A_24_P941322 | <a href="#">QKI ^ Quaking homolog, KH domain RNA binding (mouse) ^ 9444</a>                         | 3.637882632 | 3.455681481  | 0.949915605       | 10.97144376 | 3.62118    |
| 15525 | AGI_HUM1_OLIGO_A_23_P371266 | <a href="#">DNM3 ^ Dynamin 3 ^ 26052</a>                                                            | 3.637110919 | 2.828777778  | 0.777754058       | 7.104719923 | 3.62118    |
| 21383 | AGI_HUM1_OLIGO_A_23_P70539  | <a href="#">HLA-C ^ Major histocompatibility complex, class I, C ^ 3107</a>                         | 3.629646254 | 2.002        | 0.551568902       | 4.005549023 | 3.62118    |
| 30523 | AGI_HUM1_OLIGO_A_24_P64100  | <a href="#">^ FP15737 ^</a>                                                                         | 3.628126943 | 1.173333333  | 0.323399195       | 2.255321854 | 3.62118    |
| 4323  | AGI_HUM1_OLIGO_A_23_P139687 | <a href="#">FLJ32115 ^ Hypothetical protein FLJ32115 ^ 121506</a>                                   | 3.62775671  | 0.926966667  | 0.255520626       | 1.901274273 | 3.62118    |
| 12608 | AGI_HUM1_OLIGO_A_23_P302914 | <a href="#">ZFYVE28 ^ Zinc finger, FYVE domain containing 28 ^ 57732</a>                            | 3.626555548 | 1.373433333  | 0.378715648       | 2.590864083 | 3.62118    |
| 23309 | AGI_HUM1_OLIGO_A_23_P88602  | <a href="#">MEIS2 ^ Meis1, myeloid ecotropic viral integration site 1 homolog 2 (mouse) ^ 4212</a>  | 3.62606887  | 1.397740741  | 0.385469993       | 2.634886359 | 3.62118    |
| 14327 | AGI_HUM1_OLIGO_A_23_P343411 | <a href="#">AGRN ^ Agrin ^ 375790</a>                                                               | 3.624514958 | 1.131666667  | 0.312225685       | 2.191117219 | 3.62118    |
| 30538 | AGI_HUM1_OLIGO_A_24_P64401  | <a href="#">MGC16291 ^ Hypothetical protein MGC16291 ^ 84856</a>                                    | 3.622639767 | 1.192666667  | 0.329225853       | 2.28574849  | 3.62118    |
| 7048  | AGI_HUM1_OLIGO_A_23_P164237 | <a href="#">HCA66 ^ Hepatocellular carcinoma-associated antigen 66 ^ 55813</a>                      | 3.6193595   | 0.644666667  | 0.178116229       | 1.563378028 | 3.62118    |
| 9242  | AGI_HUM1_OLIGO_A_23_P208788 | <a href="#">C19orf33 ^ Chromosome 19 open reading frame 33 ^ 64073</a>                              | 3.618103022 | 1.916666667  | 0.52974353        | 3.775497251 | 3.62118    |

Supplementary Table S1. SAM between Lung mets and Parental models microarrays

List of Significant Genes for Delta = 1.311: Positive genes (934) and Negative genes (297)

| Row   | Gene ID                     | Gene Name                                                                                         | Score(d)    | Numerator(r) | Denominator(s+s0) | Fold Change | q-value(%) |
|-------|-----------------------------|---------------------------------------------------------------------------------------------------|-------------|--------------|-------------------|-------------|------------|
| 2785  | AGI_HUM1_OLIGO_A_23_P125618 | <a href="#">GABRA3 ^ Gamma-aminobutyric acid (GABA) A receptor, alpha 3 ^ 2556</a>                | 3.617052593 | 2.513188889  | 0.694816795       | 5.708805415 | 3.62118    |
| 517   | AGI_HUM1_OLIGO_A_23_P1043   | <a href="#">FLJ10901 ^ Hypothetical protein FLJ10901 ^ 55765</a>                                  | 3.61164183  | 1.465333333  | 0.405724987       | 2.761272623 | 3.62118    |
| 11738 | AGI_HUM1_OLIGO_A_23_P257516 | <a href="#">MICA ^ MHC class I polypeptide-related sequence A ^ 4276</a>                          | 3.610987557 | 1.11         | 0.307395133       | 2.158456473 | 3.62118    |
| 35771 | AGI_HUM1_OLIGO_A_32_P88791  | <a href="#">GTF2I ^ General transcription factor II, i ^ 2969</a>                                 | 3.610731945 | 0.589666667  | 0.163309455       | 1.504899002 | 3.62118    |
| 28003 | AGI_HUM1_OLIGO_A_24_P312058 | <a href="#">C6orf68 ^ Chromosome 6 open reading frame 68 ^ 116150</a>                             | 3.610627244 | 0.404333333  | 0.111984236       | 1.323477193 | 3.62118    |
| 6261  | AGI_HUM1_OLIGO_A_23_P156957 | <a href="#">NCOA7 ^ Nuclear receptor coactivator 7 ^ 135112</a>                                   | 3.608116969 | 2.254666667  | 0.624887354       | 4.772240223 | 3.62118    |
| 34798 | AGI_HUM1_OLIGO_A_32_P36235  | <a href="#">IER2 ^ Immediate early response 2 ^ 9592</a>                                          | 3.608049719 | 1.849333333  | 0.512557608       | 3.603336371 | 3.62118    |
| 20221 | AGI_HUM1_OLIGO_A_23_P59728  | <a href="#">^ ^</a>                                                                               | 3.607957433 | 1.335333333  | 0.37010784        | 2.523337765 | 3.62118    |
| 4280  | AGI_HUM1_OLIGO_A_23_P13929  | <a href="#">NRIP2 ^ Nuclear receptor interacting protein 2 ^ 83714</a>                            | 3.60037265  | 1.104634259  | 0.306811091       | 2.150443548 | 3.88802271 |
| 26485 | AGI_HUM1_OLIGO_A_24_P216765 | <a href="#">TOMM20 ^ Translocase of outer mitochondrial membrane 20 homolog (yeast) ^ 980:</a>    | 3.599937574 | 0.636333333  | 0.176762324       | 1.554373633 | 3.88802271 |
| 8007  | AGI_HUM1_OLIGO_A_23_P18684  | <a href="#">CLGN ^ Calmegin ^ 1047</a>                                                            | 3.597896326 | 2.177666667  | 0.605261094       | 4.524212416 | 3.88802271 |
| 35379 | AGI_HUM1_OLIGO_A_32_P64570  | <a href="#">ANKRD15 ^ Ankyrin repeat domain 15 ^ 23189</a>                                        | 3.5977618   | 2.134        | 0.59314655        | 4.38932775  | 3.88802271 |
| 12278 | AGI_HUM1_OLIGO_A_23_P28263  | <a href="#">CTDSP1 ^ CTD (carboxy-terminal domain, RNA polymerase II, polypeptide A) small ph</a> | 3.596774082 | 1.109        | 0.308331848       | 2.156960863 | 3.88802271 |
| 14503 | AGI_HUM1_OLIGO_A_23_P34757  | <a href="#">GPATC2 ^ G patch domain containing 2 ^ 55105</a>                                      | 3.595972498 | 0.940333333  | 0.261496253       | 1.918971564 | 3.88802271 |
| 10551 | AGI_HUM1_OLIGO_A_23_P22052  | <a href="#">PAQR4 ^ Progesterone and adiponectin receptor family member IV ^ 124222</a>           | 3.595262145 | 1.516666667  | 0.421851483       | 2.861291865 | 3.88802271 |
| 25500 | AGI_HUM1_OLIGO_A_24_P155761 | <a href="#">AKAP13 ^ A kinase (PKA) anchor protein 13 ^ 11214</a>                                 | 3.586149841 | 1.633333333  | 0.455455964       | 3.102289524 | 3.88802271 |
| 30880 | AGI_HUM1_OLIGO_A_24_P742352 | <a href="#">LOC348021 ^ Hypothetical protein LOC348021 ^ 348021</a>                               | 3.585939882 | 1.037985185  | 0.289459729       | 2.053358006 | 3.88802271 |
| 13547 | AGI_HUM1_OLIGO_A_23_P324278 | <a href="#">ALAD ^ Aminolevulinic acid, delta-, dehydratase ^ 210</a>                             | 3.585915418 | 0.633666667  | 0.176709875       | 1.551503194 | 3.88802271 |
| 6577  | AGI_HUM1_OLIGO_A_23_P16006  | <a href="#">ZNF600 ^ Zinc finger protein 600 ^ 162966</a>                                         | 3.585298763 | 0.859666667  | 0.239775462       | 1.814618996 | 3.88802271 |
| 25519 | AGI_HUM1_OLIGO_A_24_P156757 | <a href="#">MYCL1 ^ V-myc myelocytomatosis viral oncogene homolog 1, lung carcinoma derivec</a>   | 3.582444225 | 0.9598       | 0.267917639       | 1.945040236 | 3.88802271 |
| 13155 | AGI_HUM1_OLIGO_A_23_P315364 | <a href="#">CXCL2 ^ Chemokine (C-X-C motif) ligand 2 ^ 2920</a>                                   | 3.582192575 | 3.985        | 1.112447172       | 15.8345065  | 3.88802271 |
| 25954 | AGI_HUM1_OLIGO_A_24_P184555 | <a href="#">PXN ^ Paxillin ^ 5829</a>                                                             | 3.576387459 | 1.171        | 0.327425374       | 2.251677172 | 3.88802271 |
| 38743 | AGI_OLIGO_NM_005717_2_1825  | <a href="#">ARPC5 ^ Actin related protein 2/3 complex, subunit 5, 16kDa ^ 10092</a>               | 3.572355547 | 1.314333333  | 0.367917839       | 2.486873861 | 3.88802271 |
| 22894 | AGI_HUM1_OLIGO_A_23_P84629  | <a href="#">^ ^</a>                                                                               | 3.572227713 | 0.501666667  | 0.140435243       | 1.41584827  | 3.88802271 |
| 16657 | AGI_HUM1_OLIGO_A_23_P39790  | <a href="#">CD207 ^ CD207 antigen, langerin ^ 50489</a>                                           | 3.572205869 | 0.577066667  | 0.161543508       | 1.491812961 | 3.88802271 |
| 23322 | AGI_HUM1_OLIGO_A_23_P88710  | <a href="#">DKFZP564G2022 ^ DKFZP564G2022 protein ^ 25963</a>                                     | 3.5616429   | 1.119333333  | 0.314274442       | 2.172465601 | 3.88802271 |
| 25663 | AGI_HUM1_OLIGO_A_24_P166613 | <a href="#">UCC1 ^ Upregulated in colorectal cancer gene 1 ^ 54749</a>                            | 3.561503824 | 1.868592593  | 0.52466393        | 3.651761621 | 3.88802271 |
| 36880 | AGI_OLIGO_BC018130_1_2695   | <a href="#">F2RL1 ^ Coagulation factor II (thrombin) receptor-like 1 ^ 2150</a>                   | 3.556442958 | 1.884333333  | 0.529836512       | 3.691822864 | 3.88802271 |
| 8229  | AGI_HUM1_OLIGO_A_23_P200710 | <a href="#">PIK3C2B ^ Phosphoinositide-3-kinase, class 2, beta polypeptide ^ 5287</a>             | 3.556422788 | 0.975        | 0.274151882       | 1.965641197 | 3.88802271 |
| 4349  | AGI_HUM1_OLIGO_A_23_P139934 | <a href="#">ITM2B ^ Integral membrane protein 2B ^ 9445</a>                                       | 3.555255126 | 1.091        | 0.306869679       | 2.130216407 | 3.88802271 |
| 36329 | AGI_OLIGO_AK027252_1_2101   | <a href="#">ATP8A1 ^ ATPase, aminophospholipid transporter (APLT), Class I, type 8A, member 1</a> | 3.553654866 | 1.187333333  | 0.334116108       | 2.277314169 | 3.88802271 |
| 18554 | AGI_HUM1_OLIGO_A_23_P4626   | <a href="#">ZNF606 ^ Zinc finger protein 606 ^ 80095</a>                                          | 3.55164107  | 0.903333333  | 0.254342518       | 1.870382496 | 3.88802271 |
| 14798 | AGI_HUM1_OLIGO_A_23_P354387 | <a href="#">FER1L3 ^ Fer-1-like 3, myoferlin (C. elegans) ^ 26509</a>                             | 3.55045891  | 1.776666667  | 0.500404796       | 3.426336076 | 3.88802271 |
| 37804 | AGI_OLIGO_NM_001311_2_62    | <a href="#">CRIP1 ^ Cysteine-rich protein 1 (intestinal) ^ 1396</a>                               | 3.54659538  | 2.136        | 0.602267744       | 4.39541687  | 3.88802271 |
| 37565 | AGI_OLIGO_NM_000389_2_1923  | <a href="#">CDKN1A ^ Cyclin-dependent kinase inhibitor 1A (p21, Cip1) ^ 1026</a>                  | 3.544672583 | 1.646        | 0.464358826       | 3.129647127 | 3.88802271 |
| 30717 | AGI_HUM1_OLIGO_A_24_P6921   | <a href="#">^ ^</a>                                                                               | 3.54234663  | 0.675333333  | 0.190645751       | 1.596965708 | 3.88802271 |
| 3690  | AGI_HUM1_OLIGO_A_23_P133694 | <a href="#">SLC29A1 ^ Solute carrier family 29 (nucleoside transporters), member 1 ^ 2030</a>     | 3.542084434 | 0.629        | 0.177579053       | 1.546492675 | 3.88802271 |
| 7577  | AGI_HUM1_OLIGO_A_23_P168944 | <a href="#">STC1 ^ Stanniocalcin 1 ^ 6781</a>                                                     | 3.54203524  | 0.819        | 0.231222996       | 1.76418273  | 3.88802271 |
| 21295 | AGI_HUM1_OLIGO_A_23_P697    | <a href="#">KCND3 ^ Potassium voltage-gated channel, Shal-related subfamily, member 3 ^ 3752</a>  | 3.540943018 | 0.429916667  | 0.121413043       | 1.34715576  | 3.88802271 |
| 7655  | AGI_HUM1_OLIGO_A_23_P169738 | <a href="#">SOX7 ^ SRY (sex determining region Y)-box 7 ^ 83595</a>                               | 3.536937073 | 2.224833333  | 0.629028249       | 4.674568936 | 3.88802271 |
| 17826 | AGI_HUM1_OLIGO_A_23_P42575  | <a href="#">CALD1 ^ Caldesmon 1 ^ 800</a>                                                         | 3.53219235  | 1.151333333  | 0.325954314       | 2.221190812 | 3.88802271 |
| 38823 | AGI_OLIGO_NM_006270_2_366   | <a href="#">RRAS ^ Related RAS viral (r-ras) oncogene homolog ^ 6237</a>                          | 3.528263989 | 0.897        | 0.254232677       | 1.86218964  | 3.88802271 |
| 23833 | AGI_HUM1_OLIGO_A_23_P93372  | <a href="#">RING1 ^ Ring finger protein 1 ^ 6015</a>                                              | 3.526431713 | 1.134666667  | 0.321760567       | 2.19567826  | 3.88802271 |
| 39451 | AGI_OLIGO_NM_022449_1_1923  | <a href="#">RAB17 ^ RAB17, member RAS oncogene family ^ 64284</a>                                 | 3.525601229 | 1.321333333  | 0.374782412       | 2.498969569 | 3.88802271 |
| 4595  | AGI_HUM1_OLIGO_A_23_P142055 | <a href="#">^ Similar to HIDE1 ^ 255809</a>                                                       | 3.521366014 | 0.505666667  | 0.143599576       | 1.419779282 | 3.88802271 |
| 2707  | AGI_HUM1_OLIGO_A_23_P124927 | <a href="#">RGS14 ^ Regulator of G-protein signalling 14 ^ 10636</a>                              | 3.518056234 | 0.673333333  | 0.191393568       | 1.594753377 | 3.88802271 |

Supplementary Table S1. SAM between Lung mets and Parental models microarrays

List of Significant Genes for Delta = 1.311: Positive genes (934) and Negative genes (297)

| Row   | Gene ID                     | Gene Name                                                                                           | Score(d)    | Numerator(r) | Denominator(s+s0) | Fold Change | q-value(%) |
|-------|-----------------------------|-----------------------------------------------------------------------------------------------------|-------------|--------------|-------------------|-------------|------------|
| 33237 | AGI_HUM1_OLIGO_A_32_P147747 | <a href="#">RPL7 ^ Ribosomal protein L7 ^ 6129</a>                                                  | 3.517931165 | 0.973308333  | 0.276670659       | 1.963337688 | 3.88802271 |
| 37807 | AGI_OLIGO_NM_001331_1_6097  | <a href="#">CTNND1 ^ Catenin (cadherin-associated protein), delta 1 ^ 1500</a>                      | 3.517212864 | 1.085333333  | 0.308577665       | 2.121865681 | 3.88802271 |
| 8459  | AGI_HUM1_OLIGO_A_23_P202587 | <a href="#">KIAA1598 ^ KIAA1598 ^ 57698</a>                                                         | 3.51690621  | 0.763333333  | 0.217046827       | 1.697407943 | 3.88802271 |
| 32657 | AGI_HUM1_OLIGO_A_32_P106646 | <a href="#">FAM36A ^ Family with sequence similarity 36, member A ^ 116228</a>                      | 3.516675946 | 0.926333333  | 0.263411627       | 1.90043981  | 3.88802271 |
| 27475 | AGI_HUM1_OLIGO_A_24_P278167 | <a href="#">ZA20D2 ^ Zinc finger, A20 domain containing 2 ^ 7763</a>                                | 3.515433732 | 1.182        | 0.336231626       | 2.26891097  | 3.88802271 |
| 6734  | AGI_HUM1_OLIGO_A_23_P161488 | <a href="#">TIAL1 ^ TIA1 cytotoxic granule-associated RNA binding protein-like 1 ^ 7073</a>         | 3.514043887 | 0.614        | 0.174727471       | 1.53049677  | 3.88802271 |
| 10823 | AGI_HUM1_OLIGO_A_23_P24585  | <a href="#">PHACS ^ 1-aminocyclopropane-1-carboxylate synthase ^ 84680</a>                          | 3.510514614 | 0.673        | 0.191709784       | 1.594384953 | 3.88802271 |
| 39462 | AGI_OLIGO_NM_022772_2_2314  | <a href="#">EPS8L2 ^ EPS8-like 2 ^ 64787</a>                                                        | 3.509504043 | 1.471333333  | 0.419242524       | 2.772780346 | 3.88802271 |
| 8090  | AGI_HUM1_OLIGO_A_23_P19482  | <a href="#">DDAH2 ^ Dimethylarginine dimethylaminohydrolase 2 ^ 23564</a>                           | 3.508128611 | 1.568        | 0.446961949       | 2.96493402  | 3.88802271 |
| 38547 | AGI_OLIGO_NM_004685_1_1793  | <a href="#">MTMR6 ^ Myotubularin related protein 6 ^ 9107</a>                                       | 3.49974462  | 2.485333333  | 0.710147055       | 5.599637104 | 3.88802271 |
| 2681  | AGI_HUM1_OLIGO_A_23_P124619 | <a href="#">S100A14 ^ S100 calcium binding protein A14 ^ 57402</a>                                  | 3.499493717 | 2.026666667  | 0.579131392       | 4.07462324  | 3.88802271 |
| 11485 | AGI_HUM1_OLIGO_A_23_P255226 | <a href="#">EBAG9 ^ Estrogen receptor binding site associated, antigen, 9 ^ 9166</a>                | 3.49531183  | 0.963        | 0.275511899       | 1.949359262 | 3.88802271 |
| 33031 | AGI_HUM1_OLIGO_A_32_P132796 | <a href="#">BRE ^ Brain and reproductive organ-expressed (TNFRSF1A modulator) ^ 9577</a>            | 3.493848913 | 0.808        | 0.231263578       | 1.750782659 | 3.88802271 |
| 1243  | AGI_HUM1_OLIGO_A_23_P111125 | <a href="#">HCP5 ^ HLA complex P5 ^ 10866</a>                                                       | 3.49346283  | 1.54         | 0.440823353       | 2.907945035 | 3.88802271 |
| 8730  | AGI_HUM1_OLIGO_A_23_P204751 | <a href="#">ACCN2 ^ Amiloride-sensitive cation channel 2, neuronal ^ 41</a>                         | 3.487886593 | 1.055666667  | 0.302666569       | 2.078678538 | 3.88802271 |
| 12206 | AGI_HUM1_OLIGO_A_23_P27613  | <a href="#">MAN2B1 ^ Mannosidase, alpha, class 2B, member 1 ^ 4125</a>                              | 3.48599175  | 0.97         | 0.278256539       | 1.958840595 | 3.88802271 |
| 29542 | AGI_HUM1_OLIGO_A_24_P404204 | <a href="#">COX11 ^ COX11 homolog, cytochrome c oxidase assembly protein (yeast) ^ 1353</a>         | 3.483668243 | 0.666        | 0.191177791       | 1.586667686 | 3.88802271 |
| 23318 | AGI_HUM1_OLIGO_A_23_P88680  | <a href="#">C15orf24 ^ Chromosome 15 open reading frame 24 ^ 56851</a>                              | 3.483588427 | 1.117666667  | 0.320837748       | 2.169957319 | 3.88802271 |
| 3119  | AGI_HUM1_OLIGO_A_23_P12866  | <a href="#">C10orf89 ^ Chromosome 10 open reading frame 89 ^ 118672</a>                             | 3.480031119 | 0.996333333  | 0.286300122       | 1.994923375 | 3.88802271 |
| 4701  | AGI_HUM1_OLIGO_A_23_P143006 | <a href="#">PRLH ^ Prolactin releasing hormone ^ 51052</a>                                          | 3.479247716 | 0.802222222  | 0.230573471       | 1.743785058 | 3.88802271 |
| 3209  | AGI_HUM1_OLIGO_A_23_P129433 | <a href="#">SLC9A5 ^ Solute carrier family 9 (sodium/hydrogen exchanger), isoform 5 ^ 6553</a>      | 3.475876004 | 0.891666667  | 0.256530056       | 1.855318234 | 3.88802271 |
| 18560 | AGI_HUM1_OLIGO_A_23_P46315  | <a href="#">FLJ37099 ^ FLJ37099 protein ^ 163259</a>                                                | 3.474273632 | 2.148        | 0.618258729       | 4.432129391 | 3.88802271 |
| 39454 | AGI_OLIGO_NM_022551_2_488   | <a href="#">RPS18 ^ Ribosomal protein S18 ^ 6222</a>                                                | 3.473526612 | 1.072        | 0.308620062       | 2.102345818 | 3.88802271 |
| 12081 | AGI_HUM1_OLIGO_A_23_P26629  | <a href="#">PYCARD ^ PYD and CARD domain containing ^ 29108</a>                                     | 3.471691093 | 2.020333333  | 0.581945017       | 4.056775125 | 3.88802271 |
| 6029  | AGI_HUM1_OLIGO_A_23_P15493  | <a href="#">^ ^</a>                                                                                 | 3.470650755 | 1.016666667  | 0.292932576       | 2.023238881 | 3.88802271 |
| 13492 | AGI_HUM1_OLIGO_A_23_P32277  | <a href="#">BARX1 ^ BarH-like homeobox 1 ^ 56033</a>                                                | 3.470298531 | 1.832333333  | 0.528004527       | 3.561125633 | 3.88802271 |
| 19533 | AGI_HUM1_OLIGO_A_23_P53557  | <a href="#">LTBR ^ Lymphotoxin beta receptor (TNFR superfamily, member 3) ^ 4055</a>                | 3.468893527 | 0.97         | 0.279628069       | 1.958840595 | 4.42580583 |
| 28585 | AGI_HUM1_OLIGO_A_24_P345377 | <a href="#">GOLPH3L ^ Golgi phosphoprotein 3-like ^ 55204</a>                                       | 3.46670883  | 0.621666667  | 0.179324742       | 1.538651675 | 4.42580583 |
| 37959 | AGI_OLIGO_NM_001951_2_1582  | <a href="#">E2F5 ^ E2F transcription factor 5, p130-binding ^ 1875</a>                              | 3.463788063 | 0.989666667  | 0.28571802        | 1.985726138 | 4.42580583 |
| 36128 | AGI_OLIGO_AF073310_1_6909   | <a href="#">IRS2 ^ Insulin receptor substrate 2 ^ 8660</a>                                          | 3.462330077 | 2.017666667  | 0.582748213       | 4.049283538 | 4.42580583 |
| 18429 | AGI_HUM1_OLIGO_A_23_P44964  | <a href="#">^ ^</a>                                                                                 | 3.457900768 | 2.213333333  | 0.640080061       | 4.637455164 | 4.42580583 |
| 19502 | AGI_HUM1_OLIGO_A_23_P53247  | <a href="#">DTX3 ^ Deltex 3 homolog (Drosophila) ^ 196403</a>                                       | 3.457895102 | 0.672666667  | 0.194530675       | 1.594016614 | 4.42580583 |
| 19282 | AGI_HUM1_OLIGO_A_23_P51202  | <a href="#">ZNF436 ^ Zinc finger protein 436 ^ 80818</a>                                            | 3.456940319 | 0.684333333  | 0.197959256       | 1.606959237 | 4.42580583 |
| 22588 | AGI_HUM1_OLIGO_A_23_P81660  | <a href="#">C6orf209 ^ Chromosome 6 open reading frame 209 ^ 55788</a>                              | 3.456053795 | 1.110666667  | 0.321368454       | 2.159454122 | 4.42580583 |
| 1327  | AGI_HUM1_OLIGO_A_23_P111929 | <a href="#">CGI-77 ^ CGI-77 protein ^ 51633</a>                                                     | 3.451991275 | 0.760666667  | 0.220355906       | 1.694273364 | 4.42580583 |
| 2251  | AGI_HUM1_OLIGO_A_23_P120667 | <a href="#">JAM2 ^ Junctional adhesion molecule 2 ^ 58494</a>                                       | 3.451940387 | 0.531675     | 0.154022069       | 1.445606602 | 4.42580583 |
| 6329  | AGI_HUM1_OLIGO_A_23_P157576 | <a href="#">SDCBP ^ Syndecan binding protein (syntenin) ^ 6386</a>                                  | 3.450385691 | 2.027        | 0.587470556       | 4.075564786 | 4.42580583 |
| 17241 | AGI_HUM1_OLIGO_A_23_P412    | <a href="#">GNG12 ^ Guanine nucleotide binding protein (G protein), gamma 12 ^ 55970</a>            | 3.449448226 | 0.93         | 0.269608337       | 1.905275996 | 4.42580583 |
| 9647  | AGI_HUM1_OLIGO_A_23_P212042 | <a href="#">MFI2 ^ Antigen p97 (melanoma associated) identified by monoclonal antibodies 133.</a>   | 3.445237262 | 2.378592593  | 0.690400228       | 5.200291851 | 4.42580583 |
| 32963 | AGI_HUM1_OLIGO_A_32_P127052 | <a href="#">FLJ31265 ^ Hypothetical protein FLJ31265 ^ 131870</a>                                   | 3.443961576 | 1.268        | 0.368180647       | 2.408274762 | 4.42580583 |
| 36604 | AGI_OLIGO_AL050391_1_4564   | <a href="#">CASP4 ^ Caspase 4, apoptosis-related cysteine protease ^ 837</a>                        | 3.443309007 | 2.096333333  | 0.608813594       | 4.276211865 | 4.42580583 |
| 38937 | AGI_OLIGO_NM_006988_2_3723  | <a href="#">ADAMTS1 ^ A disintegrin-like and metalloprotease (reprolysin type) with thrombospor</a> | 3.442563448 | 2.583        | 0.750312969       | 5.991843738 | 4.42580583 |
| 26797 | AGI_HUM1_OLIGO_A_24_P235248 | <a href="#">PTPRZ1 ^ Protein tyrosine phosphatase, receptor-type, Z polypeptide 1 ^ 5803</a>        | 3.439404584 | 0.874096296  | 0.254141749       | 1.832859624 | 4.42580583 |
| 20755 | AGI_HUM1_OLIGO_A_23_P64792  | <a href="#">KCNMB4 ^ Potassium large conductance calcium-activated channel, subfamily M, bet</a>    | 3.438813666 | 1.2          | 0.348957552       | 2.29739671  | 4.42580583 |
| 725   | AGI_HUM1_OLIGO_A_23_P106275 | <a href="#">GABPB2 ^ GA binding protein transcription factor, beta subunit 2, 47kDa ^ 2553</a>      | 3.436645026 | 0.965666667  | 0.2809911         | 1.952965775 | 4.42580583 |
| 15821 | AGI_HUM1_OLIGO_A_23_P377957 | <a href="#">KCTD12 ^ Potassium channel tetramerisation domain containing 12 ^ 115207</a>            | 3.434967718 | 3.377333333  | 0.983221273       | 10.39150949 | 4.42580583 |



Supplementary Table S1. SAM between Lung mets and Parental models microarrays

List of Significant Genes for Delta = 1.311: Positive genes (934) and Negative genes (297)

| Row   | Gene ID                     | Gene Name                                                                                            | Score(d)     | Numerator(r) | Denominator(s+s0) | Fold Change | q-value(%) |
|-------|-----------------------------|------------------------------------------------------------------------------------------------------|--------------|--------------|-------------------|-------------|------------|
| 25160 | AGI_HUM1_OLIGO_A_24_P134488 | <a href="#">MGC17330 ^ HGFL gene ^ 113791</a>                                                        | 3.43137618   | 0.928        | 0.270445428       | 1.902636553 | 4.42580583 |
| 13948 | AGI_HUM1_OLIGO_A_23_P334168 | <a href="#">LY75 ^ Lymphocyte antigen 75 ^ 4065</a>                                                  | 3.429538933  | 3.172666667  | 0.925100058       | 9.017119659 | 4.42580583 |
| 19483 | AGI_HUM1_OLIGO_A_23_P53057  | <a href="#">ZNF215 ^ Zinc finger protein 215 ^ 7762</a>                                              | 3.427534217  | 1.312333333  | 0.382879718       | 2.483428711 | 4.42580583 |
| 31025 | AGI_HUM1_OLIGO_A_24_P788878 | <a href="#">^ ^</a>                                                                                  | 3.42324004   | 1.400541667  | 0.409127508       | 2.640006839 | 4.42580583 |
| 11891 | AGI_HUM1_OLIGO_A_23_P258862 | <a href="#">PDCD4 ^ Programmed cell death 4 (neoplastic transformation inhibitor) ^ 27250</a>        | 3.422601851  | 1.196666667  | 0.349636539       | 2.292094724 | 4.42580583 |
| 25691 | AGI_HUM1_OLIGO_A_24_P168398 | <a href="#">ZNF177 ^ Zinc finger protein 177 ^ 7730</a>                                              | 3.419517127  | 1.627666667  | 0.475993132       | 3.090128145 | 4.42580583 |
| 21071 | AGI_HUM1_OLIGO_A_23_P67618  | <a href="#">FLJ38451 ^ FLJ38451 protein ^ 126375</a>                                                 | 3.417846233  | 1.511147619  | 0.442134466       | 2.850366868 | 4.42580583 |
| 19810 | AGI_HUM1_OLIGO_A_23_P56022  | <a href="#">ZNF529 ^ Zinc finger protein 529 ^ 57711</a>                                             | 3.4176667186 | 0.843        | 0.246659477       | 1.793776319 | 4.42580583 |
| 30841 | AGI_HUM1_OLIGO_A_24_P73290  | <a href="#">ATP2A2 ^ ATPase, Ca++ transporting, cardiac muscle, slow twitch 2 ^ 488</a>              | 3.417290764  | 0.792333333  | 0.231860087       | 1.731873232 | 4.42580583 |
| 39502 | AGI_OLIGO_NM_024829_1_1597  | <a href="#">FLJ22662 ^ Hypothetical protein FLJ22662 ^ 79887</a>                                     | 3.417233198  | 1.694666667  | 0.49591777        | 3.237020869 | 4.42580583 |
| 583   | AGI_HUM1_OLIGO_A_23_P104881 | <a href="#">ROBO4 ^ Roundabout homolog 4, magic roundabout (Drosophila) ^ 54538</a>                  | 3.416406144  | 1.66837037   | 0.488340759       | 3.178553498 | 4.42580583 |
| 2175  | AGI_HUM1_OLIGO_A_23_P119976 | <a href="#">^ ^</a>                                                                                  | 3.41578677   | 1.108580952  | 0.324546298       | 2.15633444  | 4.42580583 |
| 36904 | AGI_OLIGO_BC025793_1_125    | <a href="#">C1orf31 ^ Chromosome 1 open reading frame 31 ^ 388753</a>                                | 3.41555502   | 0.804333333  | 0.235491254       | 1.746338626 | 4.42580583 |
| 14929 | AGI_HUM1_OLIGO_A_23_P357571 | <a href="#">GSTT2 ^ Glutathione S-transferase theta 2 ^ 2953</a>                                     | 3.413218765  | 1.749740741  | 0.512636564       | 3.362981263 | 4.42580583 |
| 1422  | AGI_HUM1_OLIGO_A_23_P11286  | <a href="#">HNRPH2 ^ Heterogeneous nuclear ribonucleoprotein H2 (H') ^ 3188</a>                      | 3.412170295  | 0.517333333  | 0.15161416        | 1.431307184 | 4.42580583 |
| 6469  | AGI_HUM1_OLIGO_A_23_P158969 | <a href="#">SLC39A11 ^ Solute carrier family 39 (metal ion transporter), member 11 ^ 201266</a>      | 3.411047422  | 0.627333333  | 0.183912229       | 1.544707128 | 4.42580583 |
| 11894 | AGI_HUM1_OLIGO_A_23_P258891 | <a href="#">SNX16 ^ Sorting nexin 16 ^ 64089</a>                                                     | 3.407567373  | 1.287666667  | 0.377884434       | 2.441328893 | 4.42580583 |
| 17342 | AGI_HUM1_OLIGO_A_23_P41437  | <a href="#">FLJ11200 ^ Hypothetical protein FLJ11200 ^ 55325</a>                                     | 3.407101265  | 0.933333333  | 0.273937656       | 1.909683208 | 4.42580583 |
| 13274 | AGI_HUM1_OLIGO_A_23_P31810  | <a href="#">CEBPD ^ CCAAT/enhancer binding protein (C/EBP), delta ^ 1052</a>                         | 3.407039917  | 2.136666667  | 0.627132854       | 4.397448454 | 4.42580583 |
| 15698 | AGI_HUM1_OLIGO_A_23_P37505  | <a href="#">DYX1C1 ^ Dyslexia susceptibility 1 candidate 1 ^ 161582</a>                              | 3.406276337  | 0.714        | 0.209613058       | 1.640345822 | 4.42580583 |
| 24415 | AGI_HUM1_OLIGO_A_23_P98770  | <a href="#">CENTD2 ^ Centaurin, delta 2 ^ 116985</a>                                                 | 3.405916615  | 1.034        | 0.303589347       | 2.047693801 | 4.42580583 |
| 32523 | AGI_HUM1_OLIGO_A_24_P97703  | <a href="#">PAM ^ Peptidylglycine alpha-amidating monooxygenase ^ 5066</a>                           | 3.404346599  | 1.564        | 0.459412682       | 2.956724863 | 4.42580583 |
| 38592 | AGI_OLIGO_NM_004888_2_382   | <a href="#">ATP6V1G1 ^ ATPase, H+ transporting, lysosomal 13kDa, V1 subunit G isoform 1 ^ 955</a>    | 3.404336422  | 0.903        | 0.265249931       | 1.869950396 | 4.42580583 |
| 28118 | AGI_HUM1_OLIGO_A_24_P31929  | <a href="#">PRRG1 ^ Proline rich Gla (G-carboxyglutamic acid) 1 ^ 5638</a>                           | 3.403297162  | 1.178333333  | 0.346232867       | 2.263151764 | 4.42580583 |
| 14975 | AGI_HUM1_OLIGO_A_23_P358545 | <a href="#">SLC43A3 ^ Solute carrier family 43, member 3 ^ 29015</a>                                 | 3.401936385  | 0.984666667  | 0.289442998       | 1.978856047 | 4.42580583 |
| 3263  | AGI_HUM1_OLIGO_A_23_P129935 | <a href="#">VMP1 ^ Likely ortholog of rat vacuole membrane protein 1 ^ 81671</a>                     | 3.394489301  | 1.993666667  | 0.587324481       | 3.982478758 | 4.42580583 |
| 29197 | AGI_HUM1_OLIGO_A_24_P38290  | <a href="#">TAC1 ^ Tachykinin, precursor 1 (substance K, substance P, neurokinin 1, neurokinin 2</a> | 3.391852387  | 1.405439815  | 0.4143576         | 2.648985258 | 4.42580583 |
| 25488 | AGI_HUM1_OLIGO_A_24_P154214 | <a href="#">IRF2BP2 ^ Interferon regulatory factor 2 binding protein 2 ^ 359948</a>                  | 3.38830375   | 1.891666667  | 0.558293118       | 3.710636468 | 4.42580583 |
| 3387  | AGI_HUM1_OLIGO_A_23_P130974 | <a href="#">KIAA1683 ^ KIAA1683 ^ 80726</a>                                                          | 3.386936275  | 0.8          | 0.236201669       | 1.741101127 | 4.42580583 |
| 29419 | AGI_HUM1_OLIGO_A_24_P397515 | <a href="#">HMGN4 ^ High mobility group nucleosomal binding domain 4 ^ 10473</a>                     | 3.386626677  | 0.735666667  | 0.217226974       | 1.665166762 | 4.42580583 |
| 34026 | AGI_HUM1_OLIGO_A_32_P202859 | <a href="#">LOC341567 ^ HANP1 ^ 341567</a>                                                           | 3.386018617  | 1.545339683  | 0.456388419       | 2.918727822 | 4.42580583 |
| 38809 | AGI_OLIGO_NM_006195_2_2451  | <a href="#">PBX3 ^ Pre-B-cell leukemia transcription factor 3 ^ 5090</a>                             | 3.385744056  | 1.344        | 0.396958535       | 2.538541772 | 4.42580583 |
| 12442 | AGI_HUM1_OLIGO_A_23_P29684  | <a href="#">VILL ^ Villin-like ^ 50853</a>                                                           | 3.384453633  | 1.256        | 0.371108645       | 2.388326374 | 4.42580583 |
| 24070 | AGI_HUM1_OLIGO_A_23_P95690  | <a href="#">SPOCK3 ^ Sparc/osteonectin, cwcv and kazal-like domains proteoglycan (testican) 3 ^</a>  | 3.383994694  | 1.318097222  | 0.389509246       | 2.493370409 | 4.42580583 |
| 5918  | AGI_HUM1_OLIGO_A_23_P153971 | <a href="#">SGPP2 ^ Sphingosine-1-phosphate phosphatase 2 ^ 130367</a>                               | 3.381448549  | 1.240365741  | 0.366814909       | 2.362584191 | 4.42580583 |
| 30465 | AGI_HUM1_OLIGO_A_24_P62521  | <a href="#">PSEN2 ^ Presenilin 2 (Alzheimer disease 4) ^ 5664</a>                                    | 3.380504798  | 0.684        | 0.202336645       | 1.606587994 | 4.42580583 |
| 14473 | AGI_HUM1_OLIGO_A_23_P34690  | <a href="#">LMX1A ^ LIM homeobox transcription factor 1, alpha ^ 4009</a>                            | 3.376756451  | 1.509657143  | 0.44707315        | 2.847423619 | 4.42580583 |
| 200   | AGI_HUM1_OLIGO_A_23_P101461 | <a href="#">MGC10471 ^ Hypothetical protein MGC10471 ^ 81576</a>                                     | 3.376437163  | 0.671666667  | 0.198927637       | 1.592912109 | 4.42580583 |
| 36263 | AGI_OLIGO_AK022914_1_2199   | <a href="#">^ LOC440156 ^ 440156</a>                                                                 | 3.375042066  | 0.951333333  | 0.28187303        | 1.933658913 | 4.42580583 |
| 1200  | AGI_HUM1_OLIGO_A_23_P110712 | <a href="#">DUSP1 ^ Dual specificity phosphatase 1 ^ 1843</a>                                        | 3.371625134  | 1.839        | 0.545434301       | 3.577619607 | 4.42580583 |
| 15847 | AGI_HUM1_OLIGO_A_23_P378722 | <a href="#">SAT ^ Spermidine/spermine N1-acetyltransferase ^ 6303</a>                                | 3.371055092  | 2.068666667  | 0.61365555        | 4.19498795  | 4.42580583 |
| 6204  | AGI_HUM1_OLIGO_A_23_P156471 | <a href="#">CDC5L ^ CDC5 cell division cycle 5-like (S. pombe) ^ 988</a>                             | 3.366401688  | 0.641        | 0.190411026       | 1.559409685 | 4.42580583 |
| 3986  | AGI_HUM1_OLIGO_A_23_P136544 | <a href="#">FLJ20265 ^ Hypothetical protein FLJ20265 ^ 54872</a>                                     | 3.366303407  | 0.875        | 0.259929036       | 1.834008086 | 4.42580583 |
| 15318 | AGI_HUM1_OLIGO_A_23_P36658  | <a href="#">MGST1 ^ Microsomal glutathione S-transferase 1 ^ 4257</a>                                | 3.365010103  | 0.747333333  | 0.222089477       | 1.678687088 | 4.42580583 |
| 11717 | AGI_HUM1_OLIGO_A_23_P257335 | <a href="#">KHDRB3 ^ KH domain containing, RNA binding, signal transduction associated 3 ^ 1C</a>    | 3.364748216  | 1.197666667  | 0.355945405       | 2.293684034 | 4.42580583 |
| 28663 | AGI_HUM1_OLIGO_A_24_P350124 | <a href="#">KIAA1618 ^ KIAA1618 ^ 57714</a>                                                          | 3.364383423  | 0.664666667  | 0.197559726       | 1.585201971 | 4.42580583 |

Supplementary Table S1. SAM between Lung mets and Parental models microarrays

## List of Significant Genes for Delta = 1.311: Positive genes (934) and Negative genes (297)

| Row   | Gene ID                     | Gene Name                                                                                             | Score(d)    | Numerator(r) | Denominator(s+s0) | Fold Change | q-value(%) |
|-------|-----------------------------|-------------------------------------------------------------------------------------------------------|-------------|--------------|-------------------|-------------|------------|
| 5149  | AGI_HUM1_OLIGO_A_23_P146981 | <a href="#">^ ^</a>                                                                                   | 3.361210869 | 2.348        | 0.698557779       | 5.091179741 | 4.42580583 |
| 8326  | AGI_HUM1_OLIGO_A_23_P201538 | <a href="#">JUN ^ V-jun sarcoma virus 17 oncogene homolog (avian) ^ 3725</a>                          | 3.360646964 | 1.35         | 0.401708366       | 2.549121255 | 4.42580583 |
| 34721 | AGI_HUM1_OLIGO_A_32_P3342   | <a href="#">^ ^</a>                                                                                   | 3.360350439 | 0.904666667  | 0.269217953       | 1.872111895 | 4.42580583 |
| 4706  | AGI_HUM1_OLIGO_A_23_P143044 | <a href="#">ATP6V1E2 ^ ATPase, H+ transporting, lysosomal 31kDa, V1 subunit E isoform 2 ^ 904</a>     | 3.360334392 | 2.122666667  | 0.631683166       | 4.354981731 | 4.42580583 |
| 38795 | AGI_OLIGO_NM_006113_3_4623  | <a href="#">VAV3 ^ Vav 3 oncogene ^ 10451</a>                                                         | 3.359497641 | 2.329333333  | 0.693357633       | 5.025730581 | 4.42580583 |
| 7270  | AGI_HUM1_OLIGO_A_23_P166246 | <a href="#">DSCR1 ^ Down syndrome critical region gene 1 ^ 1827</a>                                   | 3.359055364 | 1.28         | 0.381059513       | 2.428389769 | 4.42580583 |
| 4080  | AGI_HUM1_OLIGO_A_23_P137427 | <a href="#">ZMPSTE24 ^ Zinc metalloproteinase (STE24 homolog, yeast) ^ 10269</a>                      | 3.358971998 | 0.726666667  | 0.21633603        | 1.654811245 | 4.42580583 |
| 12718 | AGI_HUM1_OLIGO_A_23_P305140 | <a href="#">C10orf32 ^ Chromosome 10 open reading frame 32 ^ 119032</a>                               | 3.358759632 | 0.419333333  | 0.124847676       | 1.337309444 | 4.42580583 |
| 29250 | AGI_HUM1_OLIGO_A_24_P386323 | <a href="#">RAB9P40 ^ Rab9 effector p40 ^ 10244</a>                                                   | 3.358272016 | 0.664        | 0.197720732       | 1.584469622 | 4.42580583 |
| 26376 | AGI_HUM1_OLIGO_A_24_P20954  | <a href="#">TFAP2B ^ Transcription factor AP-2 beta (activating enhancer binding protein 2 beta)</a>  | 3.356538348 | 5.614333333  | 1.672655799       | 48.98721378 | 4.42580583 |
| 39770 | AGI_OLIGO_X59405_1_2586     | <a href="#">MCP ^ Membrane cofactor protein (CD46, trophoblast-lymphocyte cross-reactive an</a>       | 3.355087939 | 0.641333333  | 0.191152466       | 1.559770027 | 4.42580583 |
| 25348 | AGI_HUM1_OLIGO_A_24_P14531  | <a href="#">TM9SF4 ^ Transmembrane 9 superfamily protein member 4 ^ 9777</a>                          | 3.354557323 | 0.793333333  | 0.236494195       | 1.733074092 | 4.42580583 |
| 31223 | AGI_HUM1_OLIGO_A_24_P849628 | <a href="#">RDBP ^ RD RNA binding protein ^ 7936</a>                                                  | 3.352794665 | 0.619333333  | 0.184721522       | 1.536165158 | 4.42580583 |
| 14806 | AGI_HUM1_OLIGO_A_23_P354704 | <a href="#">SIAT8A ^ Sialyltransferase 8A (alpha-N-acetylneuraminase: alpha-2,8-sialyltransferase</a> | 3.352352316 | 3.062        | 0.913388484       | 8.351295419 | 4.42580583 |
| 29030 | AGI_HUM1_OLIGO_A_24_P37319  | <a href="#">ACSL3 ^ Acyl-CoA synthetase long-chain family member 3 ^ 2181</a>                         | 3.352031418 | 0.885666667  | 0.264217889       | 1.847618205 | 4.42580583 |
| 30200 | AGI_HUM1_OLIGO_A_24_P542375 | <a href="#">PTMA ^ Prothymosin, alpha (gene sequence 28) ^ 5757</a>                                   | 3.350946849 | 0.643        | 0.191886064       | 1.561572985 | 4.42580583 |
| 8308  | AGI_HUM1_OLIGO_A_23_P201386 | <a href="#">DDAH1 ^ Dimethylarginine dimethylaminohydrolase 1 ^ 23576</a>                             | 3.349027127 | 1.760333333  | 0.525625284       | 3.387763899 | 4.42580583 |
| 27050 | AGI_HUM1_OLIGO_A_24_P251764 | <a href="#">CXCL3 ^ Chemokine (C-X-C motif) ligand 3 ^ 2921</a>                                       | 3.346503548 | 2.934        | 0.87673596        | 7.642263491 | 4.42580583 |
| 17176 | AGI_HUM1_OLIGO_A_23_P410613 | <a href="#">MGC17943 ^ Hypothetical protein MGC17943 ^ 90488</a>                                      | 3.346102917 | 1.124        | 0.335913159       | 2.179504224 | 4.42580583 |
| 25742 | AGI_HUM1_OLIGO_A_24_P170887 | <a href="#">FLJ20989 ^ Hypothetical protein FLJ20989 ^ 65265</a>                                      | 3.346029145 | 1.633        | 0.488041176       | 3.101572825 | 4.42580583 |
| 423   | AGI_HUM1_OLIGO_A_23_P103502 | <a href="#">MDM4 ^ Mdm4, transformed 3T3 cell double minute 4, p53 binding protein (mouse)</a>        | 3.336538303 | 1.221666667  | 0.366147952       | 2.332159834 | 4.81015426 |
| 38204 | AGI_OLIGO_NM_002970_1_943   | <a href="#">SAT ^ Spermidine/spermine N1-acetyltransferase ^ 6303</a>                                 | 3.334727999 | 2.165666667  | 0.649428279       | 4.486737146 | 4.81015426 |
| 27293 | AGI_HUM1_OLIGO_A_24_P266037 | <a href="#">HSA9761 ^ Putative dimethyladenosine transferase ^ 27292</a>                              | 3.334500907 | 0.758        | 0.227320376       | 1.691144575 | 4.81015426 |
| 33062 | AGI_HUM1_OLIGO_A_32_P134968 | <a href="#">^ ^</a>                                                                                   | 3.330106874 | 1.713666667  | 0.514598099       | 3.279933732 | 4.81015426 |
| 2792  | AGI_HUM1_OLIGO_A_23_P125668 | <a href="#">LOC203427 ^ Similar to solute carrier family 25, member 16 ^ 203427</a>                   | 3.329317725 | 0.962333333  | 0.289048211       | 1.948458675 | 4.81015426 |
| 33135 | AGI_HUM1_OLIGO_A_32_P140139 | <a href="#">F13A1 ^ Coagulation factor XIII, A1 polypeptide ^ 2162</a>                                | 3.328493183 | 0.448666667  | 0.134795729       | 1.364778351 | 4.81015426 |
| 9771  | AGI_HUM1_OLIGO_A_23_P212997 | <a href="#">TNIP3 ^ TNFAIP3 interacting protein 3 ^ 79931</a>                                         | 3.326649158 | 2.663470238  | 0.80064657        | 6.335551627 | 4.81015426 |
| 27458 | AGI_HUM1_OLIGO_A_24_P277295 | <a href="#">RAB43 ^ RAB43, member RAS oncogene family ^ 339122</a>                                    | 3.325745641 | 0.929        | 0.279335854       | 1.903955817 | 4.81015426 |
| 32655 | AGI_HUM1_OLIGO_A_32_P106512 | <a href="#">^ ^</a>                                                                                   | 3.325055647 | 1.18         | 0.354881279       | 2.265767771 | 4.81015426 |
| 29636 | AGI_HUM1_OLIGO_A_24_P40968  | <a href="#">MGA ^ MAX gene associated ^ 23269</a>                                                     | 3.324805988 | 0.760333333  | 0.228685023       | 1.693881949 | 4.81015426 |
| 10899 | AGI_HUM1_OLIGO_A_23_P250245 | <a href="#">CD72 ^ CD72 antigen ^ 971</a>                                                             | 3.322947159 | 1.575633333  | 0.474167436       | 2.98066313  | 4.81015426 |
| 13931 | AGI_HUM1_OLIGO_A_23_P33364  | <a href="#">^ ^</a>                                                                                   | 3.322768921 | 1.304666667  | 0.392644417       | 2.470266456 | 4.81015426 |
| 8156  | AGI_HUM1_OLIGO_A_23_P200122 | <a href="#">MKNK1 ^ MAP kinase interacting serine/threonine kinase 1 ^ 8569</a>                       | 3.318986874 | 0.772        | 0.232601101       | 1.707635429 | 4.81015426 |
| 36910 | AGI_OLIGO_BC028706_1_4336   | <a href="#">SSFA2 ^ Sperm specific antigen 2 ^ 6744</a>                                               | 3.317234034 | 0.891333333  | 0.268697754       | 1.854889614 | 4.81015426 |
| 23737 | AGI_HUM1_OLIGO_A_23_P92535  | <a href="#">CNGA1 ^ Cyclic nucleotide gated channel alpha 1 ^ 1259</a>                                | 3.317226002 | 2.905        | 0.87573171        | 7.490177979 | 4.81015426 |
| 12594 | AGI_HUM1_OLIGO_A_23_P30254  | <a href="#">PLK2 ^ Polo-like kinase 2 (Drosophila) ^ 10769</a>                                        | 3.316422716 | 0.93         | 0.280422636       | 1.905275996 | 4.81015426 |
| 32411 | AGI_HUM1_OLIGO_A_24_P943792 | <a href="#">CD47 ^ CD47 antigen (Rh-related antigen, integrin-associated signal transducer) ^ 96</a>  | 3.314592572 | 0.622333333  | 0.187755605       | 1.539362847 | 4.81015426 |
| 7603  | AGI_HUM1_OLIGO_A_23_P16915  | <a href="#">QPCT ^ Glutaminyl-peptide cyclotransferase (glutaminyl cyclase) ^ 25797</a>               | 3.308784071 | 1.058666667  | 0.319956408       | 2.083005526 | 4.81015426 |
| 18552 | AGI_HUM1_OLIGO_A_23_P46238  | <a href="#">ELA2A ^ Elastase 2A ^ 63036</a>                                                           | 3.308414954 | 0.354958333  | 0.107289544       | 1.278948643 | 4.81015426 |
| 19950 | AGI_HUM1_OLIGO_A_23_P5724   | <a href="#">INPP1 ^ Inositol polyphosphate-1-phosphatase ^ 3628</a>                                   | 3.307417467 | 0.858333333  | 0.259517688       | 1.812942707 | 4.81015426 |
| 37199 | AGI_OLIGO_NKI_AB020689      | <a href="#">^ ^</a>                                                                                   | 3.307323397 | 1.466666667  | 0.443460312       | 2.76382576  | 4.81015426 |
| 37885 | AGI_OLIGO_NM_001695_2_1974  | <a href="#">ATP6V1C1 ^ ATPase, H+ transporting, lysosomal 42kDa, V1 subunit C, isoform 1 ^ 528</a>    | 3.295981839 | 0.648666667  | 0.196805291       | 1.567718646 | 4.81015426 |
| 34436 | AGI_HUM1_OLIGO_A_32_P228869 | <a href="#">SUMO2 ^ SMT3 suppressor of mif two 3 homolog 2 (yeast) ^ 6613</a>                         | 3.293189996 | 0.934333333  | 0.283716802       | 1.91007358  | 4.81015426 |
| 36853 | AGI_OLIGO_BC010607_1_2682   | <a href="#">IGF1R ^ Insulin-like growth factor 1 receptor ^ 3480</a>                                  | 3.29157518  | 1.614333333  | 0.490444011       | 3.061700861 | 4.81015426 |
| 20854 | AGI_HUM1_OLIGO_A_23_P65699  | <a href="#">FLJ21439 ^ Hypothetical protein FLJ21439 ^ 80208</a>                                      | 3.288620666 | 0.964666667  | 0.293334733       | 1.951612551 | 4.81015426 |
| 24307 | AGI_HUM1_OLIGO_A_23_P97853  | <a href="#">C10orf57 ^ Chromosome 10 open reading frame 57 ^ 80195</a>                                | 3.287810741 | 1.050333333  | 0.319462833       | 2.071008297 | 4.81015426 |

Supplementary Table S1. SAM between Lung mets and Parental models microarrays

List of Significant Genes for Delta = 1.311: Positive genes (934) and Negative genes (297)

| Row   | Gene ID                      | Gene Name                                                                                            | Score(d)    | Numerator(r) | Denominator(s+s0) | Fold Change | q-value(%) |
|-------|------------------------------|------------------------------------------------------------------------------------------------------|-------------|--------------|-------------------|-------------|------------|
| 2453  | AGI_HUM1_OLIGO_A_23_P122414  | <a href="#">GUCA1A ^ Guanylate cyclase activator 1A (retina) ^ 2978</a>                              | 3.28541733  | 1.311814815  | 0.399284074       | 2.482536303 | 4.81015426 |
| 37792 | AGI_OLIGO_NM_001257_2_3666   | <a href="#">CDH13 ^ Cadherin 13, H-cadherin (heart) ^ 1012</a>                                       | 3.284700398 | 1.294666667  | 0.394150661       | 2.453203079 | 4.81015426 |
| 39219 | AGI_OLIGO_NM_016250_1_1916   | <a href="#">NDRG2 ^ NDRG family member 2 ^ 57447</a>                                                 | 3.284166409 | 1.591333333  | 0.484547107       | 3.013277068 | 4.81015426 |
| 20408 | AGI_HUM1_OLIGO_A_23_P61426   | <a href="#">MSRA ^ Methionine sulfoxide reductase A ^ 4482</a>                                       | 3.283999589 | 1.177        | 0.35840443        | 2.261061134 | 4.81015426 |
| 13928 | AGI_HUM1_OLIGO_A_23_P333578  | <a href="#">LYG2 ^ Lysozyme-like ^ 254773</a>                                                        | 3.28304263  | 1.582148148  | 0.481915201       | 2.994153423 | 4.81015426 |
| 23526 | AGI_HUM1_OLIGO_A_23_P90589   | <a href="#">MRPL44 ^ Mitochondrial ribosomal protein L44 ^ 65080</a>                                 | 3.282148083 | 0.476333333  | 0.145128532       | 1.391203371 | 4.81015426 |
| 38839 | AGI_OLIGO_NM_006310_2_4053   | <a href="#">NPEPPS ^ Aminopeptidase puromycin sensitive ^ 9520</a>                                   | 3.281990932 | 0.862        | 0.262645455       | 1.817556233 | 4.81015426 |
| 38733 | AGI_OLIGO_NM_005619_1_1905   | <a href="#">RTN2 ^ Reticulon 2 ^ 6253</a>                                                            | 3.280234403 | 1.907        | 0.581360892       | 3.750284386 | 4.81015426 |
| 8175  | AGI_HUM1_OLIGO_A_23_P200260  | <a href="#">PCNXL2 ^ Pecanex-like 2 (Drosophila) ^ 80003</a>                                         | 3.277570645 | 0.804666667  | 0.24550704        | 1.746742162 | 4.81015426 |
| 19269 | AGI_HUM1_OLIGO_A_23_P51060   | <a href="#">MR-1 ^ Myofibrillogenesis regulator 1 ^ 25953</a>                                        | 3.275364358 | 1.849428571  | 0.564648195       | 3.603574249 | 4.81015426 |
| 16397 | AGI_HUM1_OLIGO_A_23_P391506  | <a href="#">IVNS1ABP ^ Influenza virus NS1A binding protein ^ 10625</a>                              | 3.274165406 | 1.384666667  | 0.422906755       | 2.611116209 | 4.81015426 |
| 37256 | AGI_OLIGO_NKI_CONTIG44064_RC | <a href="#">^ ^</a>                                                                                  | 3.273134131 | 0.94         | 0.28718652        | 1.918528239 | 4.81015426 |
| 19693 | AGI_HUM1_OLIGO_A_23_P55011   | <a href="#">^ ^</a>                                                                                  | 3.272980908 | 0.93         | 0.284144646       | 1.905275996 | 4.81015426 |
| 21838 | AGI_HUM1_OLIGO_A_23_P74799   | <a href="#">SLC25A24 ^ Solute carrier family 25 (mitochondrial carrier; phosphate carrier), memt</a> | 3.27213761  | 0.914333333  | 0.279429976       | 1.884697955 | 4.81015426 |

Negative genes (297)

| Row   | Gene ID                     | Gene Name                                                                                           | Score(d)     | Numerator(r) | Denominator(s+s0) | Fold Change | q-value(%) |
|-------|-----------------------------|-----------------------------------------------------------------------------------------------------|--------------|--------------|-------------------|-------------|------------|
| 10527 | AGI_HUM1_OLIGO_A_23_P219161 | <a href="#">OLFM1 ^ Olfactomedin 1 ^ 10439</a>                                                      | -13.7739776  | -4.234       | 0.307391236       | 0.053142135 | 0          |
| 29175 | AGI_HUM1_OLIGO_A_24_P382001 | <a href="#">POLR3K ^ Polymerase (RNA) III (DNA directed) polypeptide K, 12.3 kDa ^ 51728</a>        | -11.30016092 | -1.681666667 | 0.14881794        | 0.311722313 | 0          |
| 9268  | AGI_HUM1_OLIGO_A_23_P208991 | <a href="#">PALM ^ Paralemmin ^ 5064</a>                                                            | -10.6977973  | -2.691       | 0.251547111       | 0.154856087 | 0          |
| 16690 | AGI_HUM1_OLIGO_A_23_P398523 | <a href="#">PAQR4 ^ Progesterin and adipoQ receptor family member IV ^ 124222</a>                   | -9.90473996  | -1.416333333 | 0.142995509       | 0.374663325 | 0          |
| 7771  | AGI_HUM1_OLIGO_A_23_P170873 | <a href="#">GTPBP6 ^ GTP binding protein 6 (putative) ^ 8225</a>                                    | -9.590431234 | -1.671666667 | 0.174305683       | 0.313890514 | 0          |
| 38265 | AGI_OLIGO_NM_003236_1_3349  | <a href="#">TGFA ^ Transforming growth factor, alpha ^ 7039</a>                                     | -9.179154786 | -2.396666667 | 0.26109884        | 0.189902833 | 1.43546664 |
| 24652 | AGI_HUM1_OLIGO_A_24_P105102 | <a href="#">PKMYT1 ^ Membrane-associated tyrosine- and threonine-specific cdc2-inhibitory kin</a>   | -9.039169176 | -1.369333333 | 0.151488849       | 0.387070071 | 1.43546664 |
| 27797 | AGI_HUM1_OLIGO_A_24_P29876  | <a href="#">AGPAT5 ^ 1-acylglycerol-3-phosphate O-acyltransferase 5 (lysophosphatidic acid acyl</a> | -9.010126705 | -1.084666667 | 0.120383065       | 0.471501195 | 1.43546664 |
| 2987  | AGI_HUM1_OLIGO_A_23_P127522 | <a href="#">FLJ32915 ^ Hypothetical protein FLJ32915 ^ 219844</a>                                   | -8.926102661 | -1.451       | 0.162556947       | 0.365767805 | 1.43546664 |
| 14422 | AGI_HUM1_OLIGO_A_23_P345707 | <a href="#">MGC45866 ^ Leucine-rich repeat kinase 1 ^ 90381</a>                                     | -8.856166558 | -1.180666667 | 0.13331577        | 0.441147598 | 1.43546664 |
| 39627 | AGI_OLIGO_NM_054012_1_1314  | <a href="#">ASS ^ Argininosuccinate synthetase ^ 445</a>                                            | -8.757053881 | -1.401       | 0.159985312       | 0.378666579 | 1.43546664 |
| 20258 | AGI_HUM1_OLIGO_A_23_P60024  | <a href="#">PTTG1 ^ Pituitary tumor-transforming 1 ^ 9232</a>                                       | -8.416296914 | -1.786666667 | 0.212286554       | 0.289840948 | 1.43546664 |
| 3751  | AGI_HUM1_OLIGO_A_23_P134295 | <a href="#">NUDT1 ^ Nudix (nucleoside diphosphate linked moiety X)-type motif 1 ^ 4521</a>          | -8.340403429 | -1.227       | 0.147115186       | 0.42720487  | 1.43546664 |
| 13322 | AGI_HUM1_OLIGO_A_23_P31922  | <a href="#">ASS ^ Argininosuccinate synthetase ^ 445</a>                                            | -8.164552582 | -1.426666667 | 0.174739112       | 0.371989378 | 1.43546664 |
| 15839 | AGI_HUM1_OLIGO_A_23_P378526 | <a href="#">TNFRSF6B ^ Tumor necrosis factor receptor superfamily, member 6b, decoy ^ 8771</a>      | -7.969121291 | -1.803666667 | 0.226331938       | 0.28644565  | 1.53302263 |
| 16246 | AGI_HUM1_OLIGO_A_23_P388146 | <a href="#">ZNF587 ^ Zinc finger protein 587 ^ 84914</a>                                            | -7.694091615 | -1.170666667 | 0.152151381       | 0.444216022 | 1.53302263 |
| 35241 | AGI_HUM1_OLIGO_A_32_P54544  | <a href="#">CCT6A ^ Chaperonin containing TCP1, subunit 6A (zeta 1) ^ 908</a>                       | -7.57626215  | -1.184       | 0.156277591       | 0.440129507 | 1.53302263 |
| 21118 | AGI_HUM1_OLIGO_A_23_P68072  | <a href="#">FLJ12953 ^ Hypothetical protein FLJ12953 similar to Mus musculus D3Mm3e ^ 84058</a>     | -7.483901186 | -2.091666667 | 0.279488814       | 0.234609499 | 1.53302263 |
| 12696 | AGI_HUM1_OLIGO_A_23_P30464  | <a href="#">MGC10772 ^ Hypothetical protein MGC10772 ^ 80758</a>                                    | -7.397064316 | -1.878666667 | 0.253974629       | 0.271934921 | 1.53302263 |
| 7997  | AGI_HUM1_OLIGO_A_23_P18579  | <a href="#">PTTG2 ^ Pituitary tumor-transforming 2 ^ 10744</a>                                      | -7.348682348 | -1.709       | 0.232558698       | 0.30587201  | 1.53302263 |
| 13609 | AGI_HUM1_OLIGO_A_23_P32558  | <a href="#">WDR5 ^ WD repeat domain 5 ^ 11091</a>                                                   | -7.274992559 | -1.107       | 0.152165104       | 0.464258426 | 1.53302263 |
| 12281 | AGI_HUM1_OLIGO_A_23_P28307  | <a href="#">^ ^</a>                                                                                 | -7.232378645 | -1.493333333 | 0.206478865       | 0.355190935 | 1.53302263 |
| 23407 | AGI_HUM1_OLIGO_A_23_P89509  | <a href="#">SPAG5 ^ Sperm associated antigen 5 ^ 10615</a>                                          | -7.21462472  | -0.88        | 0.121974466       | 0.543367431 | 1.53302263 |
| 79    | AGI_HUM1_OLIGO_A_23_P100326 | <a href="#">^ ^</a>                                                                                 | -7.212510966 | -1.829666667 | 0.253679568       | 0.281329615 | 1.53302263 |
| 37295 | AGI_OLIGO_NKI_D25328        | <a href="#">PFKP ^ Phosphofructokinase, platelet ^ 5214</a>                                         | -7.135609696 | -0.923333333 | 0.129397959       | 0.527289315 | 1.53302263 |
| 19189 | AGI_HUM1_OLIGO_A_23_P50344  | <a href="#">TUBB4 ^ Tubulin, beta 4 ^ 10382</a>                                                     | -7.13097399  | -1.511333333 | 0.211938562       | 0.350786873 | 1.53302263 |
| 5719  | AGI_HUM1_OLIGO_A_23_P152297 | <a href="#">POLR3K ^ Polymerase (RNA) III (DNA directed) polypeptide K, 12.3 kDa ^ 51728</a>        | -7.071593801 | -1.438       | 0.203348784       | 0.369078601 | 1.53302263 |
| 22009 | AGI_HUM1_OLIGO_A_23_P7636   | <a href="#">PTTG1 ^ Pituitary tumor-transforming 1 ^ 9232</a>                                       | -7.055550727 | -1.7         | 0.240945047       | 0.307786103 | 1.53302263 |

Supplementary Table S1. SAM between Lung mets and Parental models microarrays

List of Significant Genes for Delta = 1.311: Positive genes (934) and Negative genes (297)

| Row   | Gene ID                     | Gene Name                                                                                         | Score(d)     | Numerator(r) | Denominator(s+s0) | Fold Change | q-value(%) |
|-------|-----------------------------|---------------------------------------------------------------------------------------------------|--------------|--------------|-------------------|-------------|------------|
| 39299 | AGI_OLIGO_NM_018154_1_937   | <a href="#">ASF1B ^ ASF1 anti-silencing function 1 homolog B (S. cerevisiae) ^ 55723</a>          | -6.907468341 | -1.180333333 | 0.170877849       | 0.441249536 | 1.53302263 |
| 22270 | AGI_HUM1_OLIGO_A_23_P78664  | <a href="#">DDX39 ^ DEAD (Asp-Glu-Ala-Asp) box polypeptide 39 ^ 10212</a>                         | -6.862128554 | -1.233333333 | 0.179730433       | 0.42533358  | 1.53302263 |
| 37791 | AGI_OLIGO_NM_001255_1_1579  | <a href="#">CDC20 ^ CDC20 cell division cycle 20 homolog (S. cerevisiae) ^ 991</a>                | -6.855053794 | -0.991333333 | 0.144613502       | 0.503012678 | 1.53302263 |
| 15331 | AGI_HUM1_OLIGO_A_23_P366939 | <a href="#">KRT6E ^ Keratin 6E ^ 286887</a>                                                       | -6.799502017 | -1.409222222 | 0.20725374        | 0.376514617 | 1.53302263 |
| 5151  | AGI_HUM1_OLIGO_A_23_P146997 | <a href="#">CXorf15 ^ Chromosome X open reading frame 15 ^ 55787</a>                              | -6.76522824  | -1.11        | 0.164074287       | 0.463294031 | 1.53302263 |
| 8526  | AGI_HUM1_OLIGO_A_23_P203139 | <a href="#">UBE4A ^ Ubiquitination factor E4A (UFD2 homolog, yeast) ^ 9354</a>                    | -6.73615772  | -0.927       | 0.137615543       | 0.52595089  | 1.86497634 |
| 39683 | AGI_OLIGO_NM_138998_1_1714  | <a href="#">^ ^</a>                                                                               | -6.735998289 | -1.072666667 | 0.159243904       | 0.475439388 | 1.86497634 |
| 12073 | AGI_HUM1_OLIGO_A_23_P26557  | <a href="#">FLJ13909 ^ Hypothetical protein FLJ13909 ^ 80178</a>                                  | -6.724364396 | -2.265       | 0.336834809       | 0.208049684 | 1.86497634 |
| 38560 | AGI_OLIGO_NM_004738_1_1456  | <a href="#">VAPB ^ VAMP (vesicle-associated membrane protein)-associated protein B and C ^ 9;</a> | -6.656558402 | -1.245       | 0.187033588       | 0.421907898 | 1.86497634 |
| 39070 | AGI_OLIGO_NM_014279_1_2277  | <a href="#">OLFM1 ^ Olfactomedin 1 ^ 10439</a>                                                    | -6.65089163  | -4.083666667 | 0.614002888       | 0.058978516 | 1.86497634 |
| 26522 | AGI_HUM1_OLIGO_A_24_P219378 | <a href="#">CASKIN1 ^ CASK interacting protein 1 ^ 57524</a>                                      | -6.599948364 | -1.675333333 | 0.25384037        | 0.313093761 | 1.86497634 |
| 13670 | AGI_HUM1_OLIGO_A_23_P327069 | <a href="#">KIAA0232 ^ KIAA0232 gene product ^ 9778</a>                                           | -6.493707727 | -1.168666667 | 0.179969089       | 0.444832263 | 1.91893978 |
| 18914 | AGI_HUM1_OLIGO_A_23_P49459  | <a href="#">LOC81691 ^ Exonuclease NEF-sp ^ 81691</a>                                             | -6.455938508 | -1.317333333 | 0.204049858       | 0.401275969 | 1.91893978 |
| 38629 | AGI_OLIGO_NM_005088_1_2864  | <a href="#">DXYS155E ^ DNA segment on chromosome X and Y (unique) 155 expressed sequence</a>      | -6.448953438 | -1.381       | 0.214143274       | 0.383952567 | 1.91893978 |
| 19591 | AGI_HUM1_OLIGO_A_23_P54147  | <a href="#">NIN ^ Ninein (GSK3B interacting protein) ^ 51199</a>                                  | -6.445630601 | -1.289666667 | 0.200083862       | 0.409045528 | 1.91893978 |
| 22727 | AGI_HUM1_OLIGO_A_23_P82950  | <a href="#">PCM1 ^ Pericentriolar material 1 ^ 5108</a>                                           | -6.441276861 | -1.126666667 | 0.17491356        | 0.457972645 | 1.91893978 |
| 15530 | AGI_HUM1_OLIGO_A_23_P37137  | <a href="#">DNAJC8 ^ Dnaj (Hsp40) homolog, subfamily C, member 8 ^ 22826</a>                      | -6.32935387  | -0.705       | 0.111385777       | 0.613442489 | 1.91893978 |
| 23881 | AGI_HUM1_OLIGO_A_23_P93844  | <a href="#">TOMM7 ^ Translocase of outer mitochondrial membrane 7 homolog (yeast) ^ 54543</a>     | -6.192801643 | -1.023333333 | 0.165245618       | 0.491978327 | 1.94939914 |
| 37330 | AGI_OLIGO_NKI_NM_003158     | <a href="#">^ ^</a>                                                                               | -6.184438264 | -1.566666667 | 0.253324005       | 0.337587487 | 1.94939914 |
| 38982 | AGI_OLIGO_NM_012112_2_2787  | <a href="#">TPX2 ^ TPX2, microtubule-associated protein homolog (Xenopus laevis) ^ 22974</a>      | -6.172303031 | -0.987333333 | 0.159961902       | 0.50440926  | 1.94939914 |
| 5717  | AGI_HUM1_OLIGO_A_23_P152284 | <a href="#">C16orf33 ^ Chromosome 16 open reading frame 33 ^ 79622</a>                            | -6.171969378 | -1.546       | 0.250487309       | 0.342458245 | 1.94939914 |
| 2433  | AGI_HUM1_OLIGO_A_23_P122197 | <a href="#">CCNB1 ^ Cyclin B1 ^ 891</a>                                                           | -6.157089043 | -0.963333333 | 0.156459217       | 0.512870561 | 1.94939914 |
| 29581 | AGI_HUM1_OLIGO_A_24_P406601 | <a href="#">OLFM1 ^ Olfactomedin 1 ^ 10439</a>                                                    | -6.149066794 | -3.291666667 | 0.535311581       | 0.102119716 | 1.94939914 |
| 39008 | AGI_OLIGO_NM_012321_1_632   | <a href="#">LSM4 ^ LSM4 homolog, U6 small nuclear RNA associated (S. cerevisiae) ^ 25804</a>      | -6.144778162 | -1.021333333 | 0.166211588       | 0.492660826 | 1.94939914 |
| 38266 | AGI_OLIGO_NM_003236_1_3389  | <a href="#">TGFA ^ Transforming growth factor, alpha ^ 7039</a>                                   | -6.143308554 | -1.76        | 0.286490575       | 0.295248165 | 1.94939914 |
| 38098 | AGI_OLIGO_NM_002452_2_458   | <a href="#">NUDT1 ^ Nudix (nucleoside diphosphate linked moiety X)-type motif 1 ^ 4521</a>        | -6.086607048 | -1.403       | 0.230506091       | 0.378141999 | 1.94939914 |
| 19574 | AGI_HUM1_OLIGO_A_23_P54006  | <a href="#">HECTD1 ^ HECT domain containing 1 ^ 25831</a>                                         | -6.068310015 | -1.96        | 0.322989431       | 0.257028457 | 1.94939914 |
| 39428 | AGI_OLIGO_NM_021953_1_2813  | <a href="#">FOXM1 ^ Forkhead box M1 ^ 2305</a>                                                    | -6.050404969 | -1.134666667 | 0.187535656       | 0.455440134 | 1.94939914 |
| 38336 | AGI_OLIGO_NM_003600_1_2082  | <a href="#">STK6 ^ Serine/threonine kinase 6 ^ 6790</a>                                           | -6.046725798 | -1.86        | 0.307604489       | 0.275476279 | 1.94939914 |
| 37318 | AGI_OLIGO_NKI_NM_001673     | <a href="#">ASNS ^ Asparagine synthetase ^ 440</a>                                                | -6.044179303 | -1.053333333 | 0.17427235        | 0.481853559 | 1.94939914 |
| 39429 | AGI_OLIGO_NM_021953_1_3088  | <a href="#">FOXM1 ^ Forkhead box M1 ^ 2305</a>                                                    | -6.030199781 | -1.086333333 | 0.180148813       | 0.47095681  | 1.94939914 |
| 35142 | AGI_HUM1_OLIGO_A_32_P503015 | <a href="#">^ ^</a>                                                                               | -6.027984967 | -1.160185185 | 0.192466503       | 0.447455096 | 1.94939914 |
| 35493 | AGI_HUM1_OLIGO_A_32_P72447  | <a href="#">UBE2S ^ Ubiquitin-conjugating enzyme E2S ^ 27338</a>                                  | -6.016867129 | -1.708       | 0.283868658       | 0.306084098 | 1.94939914 |
| 27776 | AGI_HUM1_OLIGO_A_24_P29703  | <a href="#">MKRN1 ^ Makorin, ring finger protein, 1 ^ 23608</a>                                   | -6.011325961 | -0.815666667 | 0.135688311       | 0.568145887 | 1.94939914 |
| 5371  | AGI_HUM1_OLIGO_A_23_P149200 | <a href="#">CDC20 ^ CDC20 cell division cycle 20 homolog (S. cerevisiae) ^ 991</a>                | -5.999403246 | -1.083666667 | 0.180629076       | 0.471828128 | 1.94939914 |
| 14513 | AGI_HUM1_OLIGO_A_23_P34788  | <a href="#">KIF2C ^ Kinesin family member 2C ^ 11004</a>                                          | -5.9656574   | -1.033333333 | 0.173213657       | 0.488579984 | 1.94939914 |
| 32239 | AGI_HUM1_OLIGO_A_24_P93901  | <a href="#">SIN3B ^ SIN3 homolog B, transcriptional regulator (yeast) ^ 23309</a>                 | -5.928356354 | -1.773333333 | 0.299127318       | 0.292532063 | 2.27941553 |
| 9274  | AGI_HUM1_OLIGO_A_23_P20905  | <a href="#">OXCT1 ^ 3-oxoacid CoA transferase 1 ^ 5019</a>                                        | -5.923538152 | -1.191       | 0.201062265       | 0.437999158 | 2.27941553 |
| 11298 | AGI_HUM1_OLIGO_A_23_P253524 | <a href="#">XENPE ^ Centromere protein E, 312kDa ^ 1062</a>                                       | -5.91195621  | -0.97        | 0.164074287       | 0.510506063 | 2.27941553 |
| 23268 | AGI_HUM1_OLIGO_A_23_P88233  | <a href="#">C14orf122 ^ Chromosome 14 open reading frame 122 ^ 51016</a>                          | -5.900655886 | -0.879333333 | 0.149022982       | 0.543618578 | 2.27941553 |
| 32729 | AGI_HUM1_OLIGO_A_32_P111609 | <a href="#">TOMM7 ^ Translocase of outer mitochondrial membrane 7 homolog (yeast) ^ 54543</a>     | -5.861210638 | -0.882666667 | 0.150594599       | 0.542364003 | 2.27941553 |
| 21117 | AGI_HUM1_OLIGO_A_23_P68068  | <a href="#">FLJ12953 ^ Hypothetical protein FLJ12953 similar to Mus musculus D3Mm3e ^ 84058</a>   | -5.830024857 | -1.998333333 | 0.342765834       | 0.250288978 | 2.27941553 |
| 21435 | AGI_HUM1_OLIGO_A_23_P70989  | <a href="#">JTV1 ^ JTV1 gene ^ 7965</a>                                                           | -5.827672855 | -1.238333333 | 0.21249191        | 0.423862038 | 2.27941553 |
| 3484  | AGI_HUM1_OLIGO_A_23_P131866 | <a href="#">STK6 ^ Serine/threonine kinase 6 ^ 6790</a>                                           | -5.818508319 | -1.49        | 0.256079379       | 0.356012549 | 2.27941553 |
| 12094 | AGI_HUM1_OLIGO_A_23_P2671   | <a href="#">KRT4 ^ Keratin 4 ^ 3851</a>                                                           | -5.800454831 | -0.877192593 | 0.151228243       | 0.544425825 | 2.27941553 |
| 13870 | AGI_HUM1_OLIGO_A_23_P331895 | <a href="#">TTYH3 ^ Tweety homolog 3 (Drosophila) ^ 80727</a>                                     | -5.786951835 | -0.659666667 | 0.113992078       | 0.63302454  | 2.27941553 |

Supplementary Table S1. SAM between Lung mets and Parental models microarrays

List of Significant Genes for Delta = 1.311: Positive genes (934) and Negative genes (297)

| Row   | Gene ID                     | Gene Name                                                                                             | Score(d)     | Numerator(r) | Denominator(s+s0) | Fold Change | q-value(%) |
|-------|-----------------------------|-------------------------------------------------------------------------------------------------------|--------------|--------------|-------------------|-------------|------------|
| 3893  | AGI_HUM1_OLIGO_A_23_P135616 | <a href="#">STX18 ^ Syntaxin 18 ^ 53407</a>                                                           | -5.766676446 | -0.953       | 0.165259835       | 0.516557194 | 2.27941553 |
| 10955 | AGI_HUM1_OLIGO_A_23_P250701 | <a href="#">PRKWINK1 ^ Protein kinase, lysine deficient 1 ^ 65125</a>                                 | -5.747670902 | -0.676666667 | 0.117728847       | 0.62560907  | 2.27941553 |
| 32128 | AGI_HUM1_OLIGO_A_24_P935103 | <a href="#">ADCY9 ^ Adenylate cyclase 9 ^ 115</a>                                                     | -5.739799444 | -1.389666667 | 0.242110666       | 0.381652973 | 2.27941553 |
| 10094 | AGI_HUM1_OLIGO_A_23_P215652 | <a href="#">TBRG4 ^ Transforming growth factor beta regulator 4 ^ 9238</a>                            | -5.739240434 | -1.231333333 | 0.214546393       | 0.425923627 | 2.27941553 |
| 23264 | AGI_HUM1_OLIGO_A_23_P88201  | <a href="#">C14orf10 ^ Chromosome 14 open reading frame 10 ^ 55012</a>                                | -5.690289356 | -1.404       | 0.246736135       | 0.377879982 | 2.27941553 |
| 14690 | AGI_HUM1_OLIGO_A_23_P351866 | <a href="#">NALP8 ^ NACHT, leucine rich repeat and PYD containing 8 ^ 126205</a>                      | -5.675863024 | -0.781211111 | 0.137637414       | 0.581878114 | 2.27941553 |
| 5890  | AGI_HUM1_OLIGO_A_23_P153757 | <a href="#">LSM4 ^ LSM4 homolog, U6 small nuclear RNA associated (S. cerevisiae) ^ 25804</a>          | -5.673254729 | -1.147       | 0.202176714       | 0.451563255 | 2.27941553 |
| 37335 | AGI_OLIGO_NKI_NM_003600     | <a href="#">STK6 ^ Serine/threonine kinase 6 ^ 6790</a>                                               | -5.663440707 | -1.706666667 | 0.301348024       | 0.306367111 | 2.27941553 |
| 35038 | AGI_HUM1_OLIGO_A_32_P458096 | <a href="#">KIAA1171 ^ KIAA1171 protein ^ 57465</a>                                                   | -5.65947234  | -1.781666667 | 0.314811445       | 0.290847203 | 2.27941553 |
| 38941 | AGI_OLIGO_NM_007019_1_406   | <a href="#">UBE2C ^ Ubiquitin-conjugating enzyme E2C ^ 11065</a>                                      | -5.651328531 | -1.399333333 | 0.247611394       | 0.379104285 | 2.27941553 |
| 18452 | AGI_HUM1_OLIGO_A_23_P45180  | <a href="#">GYPA ^ Glycophorin A (includes MN blood group) ^ 2993</a>                                 | -5.649071403 | -1.04387037  | 0.184786188       | 0.485024534 | 2.27941553 |
| 7886  | AGI_HUM1_OLIGO_A_23_P17593  | <a href="#">CDH4 ^ Cadherin 4, type 1, R-cadherin (retinal) ^ 1002</a>                                | -5.623812571 | -2.856666667 | 0.507959081       | 0.13805675  | 2.5946228  |
| 2528  | AGI_HUM1_OLIGO_A_23_P123125 | <a href="#">CCM2 ^ Cerebral cavernous malformation 2 ^ 83605</a>                                      | -5.616260181 | -0.762       | 0.135677475       | 0.589678296 | 2.5946228  |
| 21428 | AGI_HUM1_OLIGO_A_23_P70915  | <a href="#">C7orf19 ^ Chromosome 7 open reading frame 19 ^ 80228</a>                                  | -5.600936759 | -1.784       | 0.318518147       | 0.290377183 | 2.5946228  |
| 2631  | AGI_HUM1_OLIGO_A_23_P124084 | <a href="#">LOXL1 ^ Lysyl oxidase-like 1 ^ 4016</a>                                                   | -5.565864188 | -1.693       | 0.304175586       | 0.30928312  | 2.5946228  |
| 31867 | AGI_HUM1_OLIGO_A_24_P925611 | <a href="#">DDX17 ^ DEAD (Asp-Glu-Ala-Asp) box polypeptide 17 ^ 10521</a>                             | -5.555990286 | -0.694666667 | 0.125030216       | 0.617852056 | 2.5946228  |
| 20261 | AGI_HUM1_OLIGO_A_23_P60069  | <a href="#">VDAC3 ^ Voltage-dependent anion channel 3 ^ 7419</a>                                      | -5.500297539 | -1.151333333 | 0.209322009       | 0.450208958 | 2.5946228  |
| 38335 | AGI_OLIGO_NM_003600_1_2022  | <a href="#">STK6 ^ Serine/threonine kinase 6 ^ 6790</a>                                               | -5.499209255 | -1.595       | 0.2900417         | 0.331022228 | 2.5946228  |
| 27189 | AGI_HUM1_OLIGO_A_24_P258633 | <a href="#">TUBB3 ^ Tubulin, beta 3 ^ 10381</a>                                                       | -5.486875533 | -2.108       | 0.384189506       | 0.231968369 | 2.5946228  |
| 4727  | AGI_HUM1_OLIGO_A_23_P143207 | <a href="#">UBE2C ^ Ubiquitin-conjugating enzyme E2C ^ 11065</a>                                      | -5.476741372 | -1.193333333 | 0.217891124       | 0.437291335 | 2.5946228  |
| 17214 | AGI_HUM1_OLIGO_A_23_P411335 | <a href="#">SGOL2 ^ Shugoshin-like 2 (S. pombe) ^ 151246</a>                                          | -5.474906999 | -1.030666667 | 0.188252817       | 0.489483907 | 2.5946228  |
| 38969 | AGI_OLIGO_NM_007295_1_7137  | <a href="#">BRCA1 ^ Breast cancer 1, early onset ^ 672</a>                                            | -5.445499737 | -0.896666667 | 0.164661961       | 0.537126324 | 2.6876822  |
| 36642 | AGI_OLIGO_AL157459_1_1981   | <a href="#">CBX2 ^ Chromobox homolog 2 (Pc class homolog, Drosophila) ^ 876</a>                       | -5.399630764 | -1.587333333 | 0.293970718       | 0.332786005 | 2.6876822  |
| 33847 | AGI_HUM1_OLIGO_A_32_P191084 | <a href="#">KCTD5 ^ Potassium channel tetramerisation domain containing 5 ^ 54442</a>                 | -5.389050368 | -0.996333333 | 0.184881058       | 0.501272386 | 2.6876822  |
| 18519 | AGI_HUM1_OLIGO_A_23_P45917  | <a href="#">CKS1B ^ CDC28 protein kinase regulatory subunit 1B ^ 1163</a>                             | -5.362610825 | -0.753333333 | 0.140478837       | 0.593231317 | 2.6876822  |
| 36619 | AGI_OLIGO_AL133057_1_1975   | <a href="#">DKFZp434K1815 ^ Hypothetical protein DKFZp434K1815 ^ 222229</a>                           | -5.348127747 | -1.047666667 | 0.195894099       | 0.483749922 | 2.6876822  |
| 6627  | AGI_HUM1_OLIGO_A_23_P160537 | <a href="#">MGC2603 ^ Hypothetical protein MGC2603 ^ 79000</a>                                        | -5.345623209 | -1.774333333 | 0.331922634       | 0.292329366 | 2.6876822  |
| 26801 | AGI_HUM1_OLIGO_A_24_P235316 | <a href="#">VDAC3 ^ Voltage-dependent anion channel 3 ^ 7419</a>                                      | -5.323808946 | -1.014666667 | 0.190590361       | 0.494942671 | 2.6876822  |
| 4554  | AGI_HUM1_OLIGO_A_23_P141715 | <a href="#">C18orf10 ^ Chromosome 18 open reading frame 10 ^ 25941</a>                                | -5.318687776 | -0.975666667 | 0.183441237       | 0.508504813 | 2.6876822  |
| 8525  | AGI_HUM1_OLIGO_A_23_P203137 | <a href="#">UBE4A ^ Ubiquitination factor E4A (UFD2 homolog, yeast) ^ 9354</a>                        | -5.317725816 | -1.032       | 0.194067922       | 0.489031737 | 2.6876822  |
| 7777  | AGI_HUM1_OLIGO_A_23_P170927 | <a href="#">CXYorf2 ^ Chromosome X and Y open reading frame 2 ^ 80161</a>                             | -5.27650453  | -0.813       | 0.154079276       | 0.569197015 | 2.8736832  |
| 25493 | AGI_HUM1_OLIGO_A_24_P154948 | <a href="#">GARS ^ Glycyl-tRNA synthetase ^ 2617</a>                                                  | -5.261240547 | -1.778333333 | 0.338006468       | 0.291519979 | 2.8736832  |
| 37349 | AGI_OLIGO_NKI_NM_004456     | <a href="#">EZH2 ^ Enhancer of zeste homolog 2 (Drosophila) ^ 2146</a>                                | -5.245915794 | -0.916666667 | 0.174739112       | 0.529731547 | 2.8736832  |
| 23262 | AGI_HUM1_OLIGO_A_23_P88194  | <a href="#">SIP1 ^ Survival of motor neuron protein interacting protein 1 ^ 8487</a>                  | -5.16503327  | -1.166666667 | 0.225877861       | 0.445449359 | 2.8736832  |
| 3615  | AGI_HUM1_OLIGO_A_23_P133058 | <a href="#">PP784 ^ PP784 protein ^ 114932</a>                                                        | -5.15345836  | -1.012666667 | 0.196502348       | 0.495629283 | 2.8736832  |
| 19349 | AGI_HUM1_OLIGO_A_23_P51777  | <a href="#">SECP43 ^ tRNA selenocysteine associated protein ^ 54952</a>                               | -5.139113635 | -0.723333333 | 0.140750601       | 0.605696368 | 2.8736832  |
| 15083 | AGI_HUM1_OLIGO_A_23_P360874 | <a href="#">DKFZp434K1815 ^ Hypothetical protein DKFZp434K1815 ^ 222229</a>                           | -5.118988481 | -1.089666667 | 0.212867575       | 0.469869925 | 3.1792214  |
| 17624 | AGI_HUM1_OLIGO_A_23_P42087  | <a href="#">BPHL ^ Biphenyl hydrolase-like (serine hydrolase; breast epithelial mucin-associated)</a> | -5.118012708 | -0.928333333 | 0.181385508       | 0.525465032 | 3.1792214  |
| 14639 | AGI_HUM1_OLIGO_A_23_P35082  | <a href="#">SESN2 ^ Sestrin 2 ^ 83667</a>                                                             | -5.114831221 | -1.427       | 0.278992588       | 0.371903441 | 3.1792214  |
| 28808 | AGI_HUM1_OLIGO_A_24_P359291 | <a href="#">GALGT ^ UDP-N-acetyl-alpha-D-galactosamine:(N-acetylneuraminy)-galactosylglucos</a>       | -5.103038557 | -2.038441667 | 0.39945645        | 0.243426533 | 3.1792214  |
| 10471 | AGI_HUM1_OLIGO_A_23_P218694 | <a href="#">GNAS ^ GNAS complex locus ^ 2778</a>                                                      | -5.096227635 | -0.973333333 | 0.190990945       | 0.509327905 | 3.1792214  |
| 15788 | AGI_HUM1_OLIGO_A_23_P377284 | <a href="#">TGFA ^ Transforming growth factor, alpha ^ 7039</a>                                       | -5.087781977 | -2.150333333 | 0.422646517       | 0.225260563 | 3.1792214  |
| 32955 | AGI_HUM1_OLIGO_A_32_P126375 | <a href="#">NHS ^ Nance-Horan syndrome (congenital cataracts and dental anomalies) ^ 4810</a>         | -5.077037436 | -2.313291667 | 0.455638095       | 0.201200854 | 3.1792214  |
| 16759 | AGI_HUM1_OLIGO_A_23_P400344 | <a href="#">MGC10067 ^ Hypothetical protein MGC10067 ^ 134510</a>                                     | -5.064005557 | -1.293       | 0.255331473       | 0.408101523 | 3.1792214  |
| 4863  | AGI_HUM1_OLIGO_A_23_P144445 | <a href="#">PGR1 ^ Protein associated with MRG, 14 kDa ^ 93621</a>                                    | -5.055100929 | -1.036666667 | 0.205073387       | 0.487452428 | 3.1792214  |
| 25959 | AGI_HUM1_OLIGO_A_24_P184803 | <a href="#">COCH ^ Coagulation factor C homolog, cochlin (Limulus polyphemus) ^ 1690</a>              | -5.053133365 | -1.76        | 0.348298743       | 0.295248165 | 3.1792214  |



Supplementary Table S1. SAM between Lung mets and Parental models microarrays

List of Significant Genes for Delta = 1.311: Positive genes (934) and Negative genes (297)

| Row   | Gene ID                     | Gene Name                                                                                                      | Score(d)     | Numerator(r) | Denominator(s+s0) | Fold Change | q-value(%) |
|-------|-----------------------------|----------------------------------------------------------------------------------------------------------------|--------------|--------------|-------------------|-------------|------------|
| 10041 | AGI_HUM1_OLIGO_A_23_P215208 | <a href="#">FIGN1 ^ Fidgetin-like 1 ^ 63979</a>                                                                | -5.048464669 | -1.043333333 | 0.206663491       | 0.485205116 | 3.17922142 |
| 21471 | AGI_HUM1_OLIGO_A_23_P71319  | <a href="#">FDFT1 ^ Farnesyl-diphosphate farnesyltransferase 1 ^ 2222</a>                                      | -5.047249762 | -1.345       | 0.26648176        | 0.393653988 | 3.17922142 |
| 25179 | AGI_HUM1_OLIGO_A_24_P135322 | <a href="#">NRP1 ^ Neuropilin 1 ^ 8829</a>                                                                     | -5.043438162 | -2.712       | 0.537728413       | 0.152618314 | 3.17922142 |
| 17827 | AGI_HUM1_OLIGO_A_23_P425750 | <a href="#">ARMC6 ^ Armadillo repeat containing 6 ^ 93436</a>                                                  | -5.026763512 | -0.788666667 | 0.156893529       | 0.578878842 | 3.17922142 |
| 13005 | AGI_HUM1_OLIGO_A_23_P31218  | <a href="#">C7orf13 ^ Chromosome 7 open reading frame 13 ^ 129790</a>                                          | -5.018568443 | -1.626       | 0.323996777       | 0.323985241 | 3.17922142 |
| 20543 | AGI_HUM1_OLIGO_A_23_P62764  | <a href="#">MGC1203 ^ Hypothetical protein MGC1203 ^ 79140</a>                                                 | -4.982712943 | -1.617       | 0.324522006       | 0.326012684 | 3.17922142 |
| 8573  | AGI_HUM1_OLIGO_A_23_P203514 | <a href="#">CARS ^ Cysteinyl-tRNA synthetase ^ 833</a>                                                         | -4.977618263 | -1.240666667 | 0.249249059       | 0.423177062 | 3.17922142 |
| 21437 | AGI_HUM1_OLIGO_A_23_P70991  | <a href="#">JTV1 ^ JTV1 gene ^ 7965</a>                                                                        | -4.963693296 | -1.309333333 | 0.263782078       | 0.403507296 | 3.17922142 |
| 6751  | AGI_HUM1_OLIGO_A_23_P161615 | <a href="#">POLA2 ^ Polymerase (DNA-directed), alpha (70kD) ^ 23649</a>                                        | -4.960571105 | -0.784666667 | 0.158180711       | 0.580486062 | 3.17922142 |
| 20474 | AGI_HUM1_OLIGO_A_23_P62099  | <a href="#">MAGEC2 ^ Melanoma antigen, family C, 2 ^ 51438</a>                                                 | -4.943566631 | -3.083966667 | 0.623834348       | 0.117932506 | 3.17922142 |
| 16877 | AGI_HUM1_OLIGO_A_23_P40309  | <a href="#">SNRPB ^ Small nuclear ribonucleoprotein polypeptide B" ^ 6629</a>                                  | -4.942870298 | -0.87        | 0.176011092       | 0.547146851 | 3.17922142 |
| 14302 | AGI_HUM1_OLIGO_A_23_P342668 | <a href="#">DXYS155E ^ DNA segment on chromosome X and Y (unique) 155 expressed sequence</a>                   | -4.934934842 | -1.042666667 | 0.211282763       | 0.48542938  | 3.17922142 |
| 4908  | AGI_HUM1_OLIGO_A_23_P14482  | <a href="#">C14orf166 ^ Chromosome 14 open reading frame 166 ^ 51637</a>                                       | -4.923244038 | -0.967333333 | 0.196482914       | 0.511450551 | 3.17922142 |
| 17480 | AGI_HUM1_OLIGO_A_23_P417371 | <a href="#">ZSCAN2 ^ Zinc finger and SCAN domain containing 2 ^ 54993</a>                                      | -4.915862444 | -1.219333333 | 0.248040572       | 0.429481135 | 3.17922142 |
| 26100 | AGI_HUM1_OLIGO_A_24_P193093 | <a href="#">KLRK1 ^ Killer cell lectin-like receptor subfamily K, member 1 ^ 22914</a>                         | -4.910945416 | -1.8923      | 0.385322955       | 0.269377265 | 3.17922142 |
| 22058 | AGI_HUM1_OLIGO_A_23_P76815  | <a href="#">COCH ^ Coagulation factor C homolog, cochlin (Limulus polyphemus) ^ 1690</a>                       | -4.909560454 | -1.753666667 | 0.35719423        | 0.296547134 | 3.17922142 |
| 20548 | AGI_HUM1_OLIGO_A_23_P6281   | <a href="#">COL6A1 ^ Collagen, type VI, alpha 1 ^ 1291</a>                                                     | -4.905834184 | -1.921       | 0.391574588       | 0.264071406 | 3.17922142 |
| 39260 | AGI_OLIGO_NM_017488_1_3933  | <a href="#">ADD2 ^ Adducin 2 (beta) ^ 119</a>                                                                  | -4.861519473 | -2.379666667 | 0.489490309       | 0.192153789 | 3.17922142 |
| 18635 | AGI_HUM1_OLIGO_A_23_P46928  | <a href="#">PFKP ^ Phosphofructokinase, platelet ^ 5214</a>                                                    | -4.860765506 | -1.113       | 0.228976279       | 0.462331639 | 3.17922142 |
| 5021  | AGI_HUM1_OLIGO_A_23_P145777 | <a href="#">NDUFA4 ^ NADH dehydrogenase (ubiquinone) 1 alpha subcomplex, 4, 9kDa ^ 4697</a>                    | -4.831963426 | -0.983       | 0.20343697        | 0.505926601 | 3.17922142 |
| 2661  | AGI_HUM1_OLIGO_A_23_P124417 | <a href="#">BUB1 ^ BUB1 budding uninhibited by benzimidazoles 1 homolog (yeast) ^ 699</a>                      | -4.831184473 | -1.37        | 0.283574351       | 0.386891248 | 3.17922142 |
| 1487  | AGI_HUM1_OLIGO_A_23_P113522 | <a href="#">GTPBP6 ^ GTP binding protein 6 (putative) ^ 8225</a>                                               | -4.829889048 | -1.421666667 | 0.294347686       | 0.373280832 | 3.17922142 |
| 17560 | AGI_HUM1_OLIGO_A_23_P41948  | <a href="#">FLJ20364 ^ Hypothetical protein FLJ20364 ^ 54908</a>                                               | -4.82511097  | -1.565666667 | 0.324483038       | 0.337821565 | 3.17922142 |
| 35063 | AGI_HUM1_OLIGO_A_32_P465742 | <a href="#">PIP5K1B ^ Phosphatidylinositol-4-phosphate 5-kinase, type I, beta ^ 8395</a>                       | -4.821783927 | -2.228666667 | 0.462207909       | 0.213355814 | 3.17922142 |
| 6389  | AGI_HUM1_OLIGO_A_23_P158148 | <a href="#">CCT6A ^ Chaperonin containing TCP1, subunit 6A (zeta 1) ^ 908</a>                                  | -4.812527142 | -1.084333333 | 0.225314747       | 0.471610148 | 3.17922142 |
| 21640 | AGI_HUM1_OLIGO_A_23_P72912  | <a href="#">SLC4A8 ^ Solute carrier family 4, sodium bicarbonate cotransporter, member 8 ^ 949</a>             | -4.80550577  | -0.659759259 | 0.137292366       | 0.632983913 | 3.17922142 |
| 24565 | AGI_HUM1_OLIGO_A_24_P100517 | <a href="#">C9orf140 ^ Chromosome 9 open reading frame 140 ^ 89958</a>                                         | -4.796095914 | -1.145333333 | 0.238805344       | 0.452085223 | 3.17922142 |
| 19526 | AGI_HUM1_OLIGO_A_23_P53476  | <a href="#">LDHB ^ Lactate dehydrogenase B ^ 3945</a>                                                          | -4.784943081 | -0.546666667 | 0.114247266       | 0.684600064 | 3.17922142 |
| 18962 | AGI_HUM1_OLIGO_A_23_P49878  | <a href="#">FLJ10156 ^ Hypothetical protein FLJ10156 ^ 54478</a>                                               | -4.784347188 | -0.806666667 | 0.168605378       | 0.571701243 | 3.17922142 |
| 27785 | AGI_HUM1_OLIGO_A_24_P297539 | <a href="#">UBE2C ^ Ubiquitin-conjugating enzyme E2C ^ 11065</a>                                               | -4.782413359 | -1.145666667 | 0.239558269       | 0.451980781 | 3.17922142 |
| 37734 | AGI_OLIGO_NM_001067_2_5423  | <a href="#">TOP2A ^ Topoisomerase (DNA) II alpha 170kDa ^ 7153</a>                                             | -4.775573861 | -1.029       | 0.215471487       | 0.490049708 | 3.17922142 |
| 6732  | AGI_HUM1_OLIGO_A_23_P161474 | <a href="#">MCM10 ^ MCM10 minichromosome maintenance deficient 10 (S. cerevisiae) ^ 55388</a>                  | -4.773247868 | -1.345333333 | 0.281848622       | 0.393563045 | 3.17922142 |
| 8970  | AGI_HUM1_OLIGO_A_23_P206632 | <a href="#">PAQR4 ^ Progestin and adipoQ receptor family member IV ^ 124222</a>                                | -4.772506193 | -1.42        | 0.297537592       | 0.373712312 | 3.17922142 |
| 35007 | AGI_HUM1_OLIGO_A_32_P446374 | <a href="#">^ Homo sapiens, clone IMAGE:3930408, mRNA ^</a>                                                    | -4.770625033 | -1.78695     | 0.37457356        | 0.289784031 | 3.17922142 |
| 36620 | AGI_OLIGO_AL133057_1_2043   | <a href="#">DKFZp434K1815 ^ Hypothetical protein DKFZp434K1815 ^ 222229</a>                                    | -4.744324145 | -1.153333333 | 0.243097499       | 0.449585268 | 3.24859346 |
| 9361  | AGI_HUM1_OLIGO_A_23_P209735 | <a href="#">FLJ12584 ^ Hypothetical protein FLJ12584 ^ 80210</a>                                               | -4.735871925 | -1.568891667 | 0.331278314       | 0.337067243 | 3.24859346 |
| 38446 | AGI_OLIGO_NM_004219_2_4     | <a href="#">PTTG1 ^ Pituitary tumor-transforming 1 ^ 9232</a>                                                  | -4.733839919 | -1.690333333 | 0.35707446        | 0.309855325 | 3.24859346 |
| 28399 | AGI_HUM1_OLIGO_A_24_P335620 | <a href="#">SLC7A5 ^ Solute carrier family 7 (cationic amino acid transporter, y+ system), member 5 ^ 9249</a> | -4.729160139 | -1.958       | 0.414027003       | 0.257385021 | 3.24859346 |
| 14093 | AGI_HUM1_OLIGO_A_23_P33759  | <a href="#">DHS3 ^ Dehydrogenase/reductase (SDR family) member 3 ^ 9249</a>                                    | -4.728914207 | -1.817333333 | 0.384302454       | 0.283744959 | 3.24859346 |
| 12619 | AGI_HUM1_OLIGO_A_23_P30315  | <a href="#">TRIM7 ^ Tripartite motif-containing 7 ^ 81786</a>                                                  | -4.717393004 | -1.151666667 | 0.244132016       | 0.450104949 | 3.24859346 |
| 11619 | AGI_HUM1_OLIGO_A_23_P256455 | <a href="#">RPA3 ^ Replication protein A3, 14kDa ^ 6119</a>                                                    | -4.715963315 | -1.453333333 | 0.308173163       | 0.365176711 | 3.24859346 |
| 14445 | AGI_HUM1_OLIGO_A_23_P346206 | <a href="#">^ ^</a>                                                                                            | -4.684586836 | -1.000333333 | 0.213537152       | 0.499884489 | 3.24859346 |
| 720   | AGI_HUM1_OLIGO_A_23_P106204 | <a href="#">GSTZ1 ^ Glutathione transferase zeta 1 (maleylacetoacetate isomerase) ^ 2954</a>                   | -4.683677879 | -1.002333333 | 0.214005608       | 0.499191982 | 3.24859346 |
| 23696 | AGI_HUM1_OLIGO_A_23_P9214   | <a href="#">NANS ^ N-acetylneuraminic acid synthase (sialic acid synthase) ^ 54187</a>                         | -4.673745213 | -0.721333333 | 0.154337325       | 0.606536624 | 3.24859346 |
| 39099 | AGI_OLIGO_NM_014501_1_635   | <a href="#">UBE2S ^ Ubiquitin-conjugating enzyme E2S ^ 27338</a>                                               | -4.665518732 | -1.573333333 | 0.33722581        | 0.3360311   | 3.24859346 |
| 6981  | AGI_HUM1_OLIGO_A_23_P163659 | <a href="#">MPG ^ N-methylpurine-DNA glycosylase ^ 4350</a>                                                    | -4.665081007 | -1.299666667 | 0.278594662       | 0.406220044 | 3.24859346 |

Supplementary Table S1. SAM between Lung mets and Parental models microarrays

List of Significant Genes for Delta = 1.311: Positive genes (934) and Negative genes (297)

| Row   | Gene ID                     | Gene Name                                                                                           | Score(d)     | Numerator(r) | Denominator(s+s0) | Fold Change | q-value(%) |
|-------|-----------------------------|-----------------------------------------------------------------------------------------------------|--------------|--------------|-------------------|-------------|------------|
| 36274 | AGI_OLIGO_AK023653_1_1893   | <a href="#">SMARCE1 ^ SWI/SNF related, matrix associated, actin dependent regulator of chrom:</a>   | -4.659453959 | -0.937666667 | 0.201239603       | 0.522076575 | 3.24859346 |
| 1772  | AGI_HUM1_OLIGO_A_23_P116430 | <a href="#">USH1C ^ Usher syndrome 1C (autosomal recessive, severe) ^ 10083</a>                     | -4.624365638 | -0.8205      | 0.177429742       | 0.566245663 | 3.24859346 |
| 26235 | AGI_HUM1_OLIGO_A_24_P202527 | <a href="#">SMAD2 ^ SMAD, mothers against DPP homolog 2 (Drosophila) ^ 4087</a>                     | -4.619219901 | -1.037       | 0.224496781       | 0.487339815 | 3.24859346 |
| 10841 | AGI_HUM1_OLIGO_A_23_P24723  | <a href="#">HSPC196 ^ Hypothetical protein HSPC196 ^ 51524</a>                                      | -4.60292537  | -0.900333333 | 0.195600246       | 0.535762929 | 3.24859346 |
| 3303  | AGI_HUM1_OLIGO_A_23_P130316 | <a href="#">PIAS2 ^ Protein inhibitor of activated STAT, 2 ^ 9063</a>                               | -4.600611852 | -1.633666667 | 0.355097696       | 0.322268109 | 3.24859346 |
| 4141  | AGI_HUM1_OLIGO_A_23_P138025 | <a href="#">FLJ10349 ^ Hypothetical protein FLJ10349 ^ 54707</a>                                    | -4.598257394 | -0.77        | 0.167454741       | 0.586417475 | 3.24859346 |
| 39139 | AGI_OLIGO_NM_014791_1_2145  | <a href="#">MELK ^ Maternal embryonic leucine zipper kinase ^ 9833</a>                              | -4.585219068 | -0.653333333 | 0.142486831       | 0.635809583 | 3.62118    |
| 15139 | AGI_HUM1_OLIGO_A_23_P362228 | <a href="#">LOC148898 ^ Hypothetical protein BC007899 ^ 148898</a>                                  | -4.568564987 | -1.347666667 | 0.294986866       | 0.392927033 | 3.62118    |
| 20867 | AGI_HUM1_OLIGO_A_23_P6582   | <a href="#">PMS2 ^ PMS2 postmeiotic segregation increased 2 (S. cerevisiae) ^ 5395</a>              | -4.568234253 | -0.921666667 | 0.201755561       | 0.527898815 | 3.62118    |
| 1440  | AGI_HUM1_OLIGO_A_23_P113026 | <a href="#">PARN ^ Poly(A)-specific ribonuclease (deadenylation nuclease) ^ 5073</a>                | -4.562714227 | -0.771666667 | 0.169124479       | 0.58574041  | 3.62118    |
| 7866  | AGI_HUM1_OLIGO_A_23_P17430  | <a href="#">RNPC1 ^ RNA-binding region (RNP1, RRM) containing 1 ^ 55544</a>                         | -4.560495163 | -1.163333333 | 0.255089259       | 0.446479756 | 3.62118    |
| 28032 | AGI_HUM1_OLIGO_A_24_P313756 | <a href="#">TUBB6 ^ Tubulin, beta 6 ^ 84617</a>                                                     | -4.530291633 | -1.091333333 | 0.240896927       | 0.469327423 | 3.62118    |
| 15879 | AGI_HUM1_OLIGO_A_23_P37954  | <a href="#">CCNF ^ Cyclin F ^ 899</a>                                                               | -4.523948536 | -1.132933333 | 0.250430199       | 0.455987653 | 3.62118    |
| 31093 | AGI_HUM1_OLIGO_A_24_P810290 | <a href="#">^ ^</a>                                                                                 | -4.520937297 | -2.400666667 | 0.53101083        | 0.18937704  | 3.62118    |
| 12176 | AGI_HUM1_OLIGO_A_23_P27334  | <a href="#">ZFP161 ^ Zinc finger protein 161 homolog (mouse) ^ 7541</a>                             | -4.517946158 | -0.856       | 0.189466623       | 0.552482242 | 3.62118    |
| 32529 | AGI_HUM1_OLIGO_A_24_P98086  | <a href="#">GNA12 ^ Guanine nucleotide binding protein (G protein) alpha 12 ^ 2768</a>              | -4.515793265 | -0.860666667 | 0.190590361       | 0.550698023 | 3.62118    |
| 23269 | AGI_HUM1_OLIGO_A_23_P88234  | <a href="#">C14orf122 ^ Chromosome 14 open reading frame 122 ^ 51016</a>                            | -4.500082005 | -1.186333333 | 0.263624825       | 0.439418242 | 3.62118    |
| 24103 | AGI_HUM1_OLIGO_A_23_P95972  | <a href="#">TXNL4B ^ Thioredoxin-like 4B ^ 54957</a>                                                | -4.498843027 | -1.004666667 | 0.223316675       | 0.49838527  | 3.62118    |
| 38966 | AGI_OLIGO_NM_007274_1_839   | <a href="#">BACH ^ Brain acyl-CoA hydrolase ^ 11332</a>                                             | -4.492428386 | -1.610333333 | 0.358454981       | 0.327522668 | 3.62118    |
| 5106  | AGI_HUM1_OLIGO_A_23_P146572 | <a href="#">NPDC1 ^ Neural proliferation, differentiation and control, 1 ^ 56654</a>                | -4.488670982 | -1.454       | 0.323926616       | 0.365008003 | 3.62118    |
| 3057  | AGI_HUM1_OLIGO_A_23_P128154 | <a href="#">TUBA6 ^ Tubulin alpha 6 ^ 84790</a>                                                     | -4.477540615 | -0.776       | 0.173309427       | 0.583983697 | 3.62118    |
| 33182 | AGI_HUM1_OLIGO_A_32_P143245 | <a href="#">^ ^</a>                                                                                 | -4.472090097 | -0.728333333 | 0.162861954       | 0.603600818 | 3.62118    |
| 11192 | AGI_HUM1_OLIGO_A_23_P252642 | <a href="#">BBS5 ^ Bardet-Biedl syndrome 5 ^ 129880</a>                                             | -4.469076866 | -1.195       | 0.267393029       | 0.436786448 | 3.62118    |
| 11473 | AGI_HUM1_OLIGO_A_23_P255122 | <a href="#">GAB3 ^ GRB2-associated binding protein 3 ^ 139716</a>                                   | -4.455001531 | -0.659666667 | 0.148073275       | 0.63302454  | 3.62118    |
| 12084 | AGI_HUM1_OLIGO_A_23_P26649  | <a href="#">HSCARG ^ HSCARG protein ^ 57407</a>                                                     | -4.449895734 | -0.694       | 0.15595871        | 0.61813763  | 3.62118    |
| 23692 | AGI_HUM1_OLIGO_A_23_P9212   | <a href="#">NANS ^ N-acetylneuraminic acid synthase (sialic acid synthase) ^ 54187</a>              | -4.438105073 | -0.826666667 | 0.186265682       | 0.563830464 | 3.62118    |
| 22666 | AGI_HUM1_OLIGO_A_23_P82361  | <a href="#">GARS ^ Glycyl-tRNA synthetase ^ 2617</a>                                                | -4.43386278  | -1.473333333 | 0.332291144       | 0.360149215 | 3.62118    |
| 19922 | AGI_HUM1_OLIGO_A_23_P56969  | <a href="#">C20orf11 ^ Chromosome 20 open reading frame 11 ^ 54994</a>                              | -4.431503129 | -1.218333333 | 0.274925527       | 0.429778932 | 3.62118    |
| 10170 | AGI_HUM1_OLIGO_A_23_P216312 | <a href="#">CNOT7 ^ CCR4-NOT transcription complex, subunit 7 ^ 29883</a>                           | -4.42731363  | -0.822333333 | 0.185740926       | 0.565526552 | 3.62118    |
| 17832 | AGI_HUM1_OLIGO_A_23_P425826 | <a href="#">PP784 ^ PP784 protein ^ 114932</a>                                                      | -4.417994914 | -1.062666667 | 0.240531437       | 0.47874633  | 3.62118    |
| 28941 | AGI_HUM1_OLIGO_A_24_P367227 | <a href="#">^ ^</a>                                                                                 | -4.414966279 | -1.272142857 | 0.288143278       | 0.41404433  | 3.62118    |
| 21820 | AGI_HUM1_OLIGO_A_23_P74648  | <a href="#">NUDC ^ Nuclear distribution gene C homolog (A. nidulans) ^ 10726</a>                    | -4.410959173 | -1.229       | 0.278624207       | 0.426613049 | 3.88802271 |
| 28309 | AGI_HUM1_OLIGO_A_24_P330397 | <a href="#">STRN3 ^ Striatin, calmodulin binding protein 3 ^ 29966</a>                              | -4.410315357 | -1.056333333 | 0.239514241       | 0.480852614 | 3.88802271 |
| 35369 | AGI_HUM1_OLIGO_A_32_P63848  | <a href="#">OXCT1 ^ 3-oxoacid CoA transferase 1 ^ 5019</a>                                          | -4.408962334 | -1.090666667 | 0.247374911       | 0.469544349 | 3.88802271 |
| 21172 | AGI_HUM1_OLIGO_A_23_P68610  | <a href="#">TPX2 ^ TPX2, microtubule-associated protein homolog (Xenopus laevis) ^ 22974</a>        | -4.408032681 | -1.177       | 0.267012539       | 0.442270218 | 3.88802271 |
| 39647 | AGI_OLIGO_NM_080668_1_1789  | <a href="#">CDCA5 ^ Cell division cycle associated 5 ^ 113130</a>                                   | -4.404887651 | -0.72        | 0.163454793       | 0.607097442 | 3.88802271 |
| 37552 | AGI_OLIGO_NM_000350_1_6505  | <a href="#">ABCA4 ^ ATP-binding cassette, sub-family A (ABC1), member 4 ^ 24</a>                    | -4.400487718 | -0.5507      | 0.125145219       | 0.682688805 | 3.88802271 |
| 28890 | AGI_HUM1_OLIGO_A_24_P364381 | <a href="#">MMAB ^ Methylmalonic aciduria (cobalamin deficiency) type B ^ 326625</a>                | -4.400285183 | -0.503       | 0.114310773       | 0.705637922 | 3.88802271 |
| 37920 | AGI_OLIGO_NM_001813_1_8118  | <a href="#">CENPE ^ Centromere protein E, 312kDa ^ 1062</a>                                         | -4.386934994 | -1.126666667 | 0.256823196       | 0.457972645 | 3.88802271 |
| 26304 | AGI_HUM1_OLIGO_A_24_P205589 | <a href="#">BACH ^ Brain acyl-CoA hydrolase ^ 11332</a>                                             | -4.386450644 | -1.703333333 | 0.388316995       | 0.307075787 | 3.88802271 |
| 19661 | AGI_HUM1_OLIGO_A_23_P54758  | <a href="#">MIR16 ^ Membrane interacting protein of RGS16 ^ 51573</a>                               | -4.378519294 | -0.734333333 | 0.167712709       | 0.601095726 | 3.88802271 |
| 38604 | AGI_OLIGO_NM_004964_2_1751  | <a href="#">HDAC1 ^ Histone deacetylase 1 ^ 3065</a>                                                | -4.373510024 | -0.902666667 | 0.2063941         | 0.534897117 | 3.88802271 |
| 16076 | AGI_HUM1_OLIGO_A_23_P3841   | <a href="#">TRAP1 ^ TNF receptor-associated protein 1 ^ 10131</a>                                   | -4.359653763 | -1.151666667 | 0.264164709       | 0.450104949 | 3.88802271 |
| 26953 | AGI_HUM1_OLIGO_A_24_P245358 | <a href="#">ATP5A1 ^ ATP synthase, H+ transporting, mitochondrial F1 complex, alpha subunit, is</a> | -4.344945345 | -0.868333333 | 0.199849081       | 0.547779305 | 3.88802271 |
| 28689 | AGI_HUM1_OLIGO_A_24_P35109  | <a href="#">CLDN3 ^ Claudin 3 ^ 1365</a>                                                            | -4.337694527 | -0.975333333 | 0.224850627       | 0.508622316 | 3.88802271 |
| 37735 | AGI_OLIGO_NM_001067_2_5468  | <a href="#">TOP2A ^ Topoisomerase (DNA) II alpha 170kDa ^ 7153</a>                                  | -4.329266817 | -1.135666667 | 0.262323094       | 0.455124556 | 3.88802271 |

Supplementary Table S1. SAM between Lung mets and Parental models microarrays

List of Significant Genes for Delta = 1.311: Positive genes (934) and Negative genes (297)

| Row   | Gene ID                     | Gene Name                                                                                           | Score(d)     | Numerator(r) | Denominator(s+s0) | Fold Change | q-value(%) |
|-------|-----------------------------|-----------------------------------------------------------------------------------------------------|--------------|--------------|-------------------|-------------|------------|
| 14164 | AGI_HUM1_OLIGO_A_23_P339191 | <a href="#">CBL ^ Cas-Br-M (murine) ecotropic retroviral transforming sequence ^ 867</a>            | -4.328939986 | -0.658       | 0.152000259       | 0.633756261 | 3.88802271 |
| 21323 | AGI_HUM1_OLIGO_A_23_P69988  | <a href="#">RARS ^ Arginyl-tRNA synthetase ^ 5917</a>                                               | -4.328125448 | -0.866       | 0.200086622       | 0.548665969 | 3.88802271 |
| 3001  | AGI_HUM1_OLIGO_A_23_P127615 | <a href="#">TRAPP4 ^ Trafficking protein particle complex 4 ^ 51399</a>                             | -4.322806403 | -0.876666667 | 0.202800354       | 0.544624328 | 3.88802271 |
| 14183 | AGI_HUM1_OLIGO_A_23_P339705 | <a href="#">C19orf14 ^ Chromosome 19 open reading frame 14 ^ 284403</a>                             | -4.318209417 | -1.063666667 | 0.246321233       | 0.478414604 | 3.88802271 |
| 24207 | AGI_HUM1_OLIGO_A_23_P96990  | <a href="#">NVL ^ Nuclear VCP-like ^ 4931</a>                                                       | -4.310795654 | -0.595       | 0.138025564       | 0.662044455 | 3.88802271 |
| 7862  | AGI_HUM1_OLIGO_A_23_P17393  | <a href="#">CSE1L ^ CSE1 chromosome segregation 1-like (yeast) ^ 1434</a>                           | -4.308237317 | -1.056       | 0.245111846       | 0.480963727 | 3.88802271 |
| 4525  | AGI_HUM1_OLIGO_A_23_P141447 | <a href="#">RAD52B ^ RAD52 homolog B (S. cerevisiae) ^ 201299</a>                                   | -4.307585716 | -1.846666667 | 0.428701084       | 0.278034021 | 3.88802271 |
| 28287 | AGI_HUM1_OLIGO_A_24_P329353 | <a href="#">C7orf19 ^ Chromosome 7 open reading frame 19 ^ 80228</a>                                | -4.301985643 | -1.766333333 | 0.410585595       | 0.293954887 | 3.88802271 |
| 12672 | AGI_HUM1_OLIGO_A_23_P304287 | <a href="#">PSMC2 ^ Proteasome (prosome, macropain) 26S subunit, ATPase, 2 ^ 5701</a>               | -4.296064161 | -0.796333333 | 0.185363464       | 0.575810765 | 3.88802271 |
| 18973 | AGI_HUM1_OLIGO_A_23_P49972  | <a href="#">CDC6 ^ CDC6 cell division cycle 6 homolog (S. cerevisiae) ^ 990</a>                     | -4.292526557 | -0.863333333 | 0.201124751       | 0.549681057 | 3.88802271 |
| 9513  | AGI_HUM1_OLIGO_A_23_P210995 | <a href="#">OSBPL2 ^ Oxysterol binding protein-like 2 ^ 9885</a>                                    | -4.290389069 | -1.155333333 | 0.269284047       | 0.448962442 | 3.88802271 |
| 38618 | AGI_OLIGO_NM_005030_2_1638  | <a href="#">PLK1 ^ Polo-like kinase 1 (Drosophila) ^ 5347</a>                                       | -4.284762121 | -0.745666667 | 0.174027553       | 0.596392216 | 3.88802271 |
| 23618 | AGI_HUM1_OLIGO_A_23_P91468  | <a href="#">PSMA7 ^ Proteasome (prosome, macropain) subunit, alpha type, 7 ^ 5688</a>               | -4.276970273 | -1.122       | 0.262335235       | 0.459456442 | 3.88802271 |
| 31884 | AGI_HUM1_OLIGO_A_24_P926432 | <a href="#">^ ^</a>                                                                                 | -4.276453716 | -0.624       | 0.145915294       | 0.648869383 | 3.88802271 |
| 11287 | AGI_HUM1_OLIGO_A_23_P253421 | <a href="#">AUP1 ^ Ancient ubiquitous protein 1 ^ 550</a>                                           | -4.26660428  | -0.958333333 | 0.224612659       | 0.514651118 | 3.88802271 |
| 8913  | AGI_HUM1_OLIGO_A_23_P20615  | <a href="#">ANP32B ^ Acidic (leucine-rich) nuclear phosphoprotein 32 family, member B ^ 10541</a>   | -4.263086747 | -0.827666667 | 0.194147273       | 0.563439781 | 3.88802271 |
| 10097 | AGI_HUM1_OLIGO_A_23_P215677 | <a href="#">FLJ10803 ^ Hypothetical protein FLJ10803 ^ 55744</a>                                    | -4.26263637  | -1.480333333 | 0.347281167       | 0.358405993 | 3.88802271 |
| 11719 | AGI_HUM1_OLIGO_A_23_P25735  | <a href="#">PSMA6 ^ Proteasome (prosome, macropain) subunit, alpha type, 6 ^ 5687</a>               | -4.260471785 | -1.223       | 0.287057411       | 0.428390977 | 3.88802271 |
| 2512  | AGI_HUM1_OLIGO_A_23_P122947 | <a href="#">^ ^</a>                                                                                 | -4.255824351 | -0.805666667 | 0.189309191       | 0.572097654 | 3.88802271 |
| 4460  | AGI_HUM1_OLIGO_A_23_P140876 | <a href="#">ABCA3 ^ ATP-binding cassette, sub-family A (ABC1), member 3 ^ 21</a>                    | -4.254563648 | -1.413333333 | 0.332192312       | 0.375443226 | 3.88802271 |
| 38449 | AGI_OLIGO_NM_004237_2_1999  | <a href="#">TRIP13 ^ Thyroid hormone receptor interactor 13 ^ 9319</a>                              | -4.254162533 | -1.010333333 | 0.237492885       | 0.496431534 | 3.88802271 |
| 39295 | AGI_OLIGO_NM_018101_1_1620  | <a href="#">CDCA8 ^ Cell division cycle associated 8 ^ 55143</a>                                    | -4.243945125 | -1.064666667 | 0.250867209       | 0.478083107 | 3.88802271 |
| 39356 | AGI_OLIGO_NM_019082_1_1830  | <a href="#">DDX56 ^ DEAD (Asp-Glu-Ala-Asp) box polypeptide 56 ^ 54606</a>                           | -4.240098008 | -0.97        | 0.228768297       | 0.510506063 | 3.88802271 |
| 30055 | AGI_HUM1_OLIGO_A_24_P500891 | <a href="#">AK2 ^ Adenylate kinase 2 ^ 204</a>                                                      | -4.225270902 | -0.910666667 | 0.215528587       | 0.531939226 | 3.88802271 |
| 19923 | AGI_HUM1_OLIGO_A_23_P56971  | <a href="#">C20orf11 ^ Chromosome 20 open reading frame 11 ^ 54994</a>                              | -4.222378572 | -1.131       | 0.267858502       | 0.456599125 | 3.88802271 |
| 7549  | AGI_HUM1_OLIGO_A_23_P168683 | <a href="#">DDX56 ^ DEAD (Asp-Glu-Ala-Asp) box polypeptide 56 ^ 54606</a>                           | -4.213328529 | -1.348333333 | 0.320016188       | 0.392745504 | 4.42580583 |
| 5369  | AGI_HUM1_OLIGO_A_23_P149195 | <a href="#">CDC20 ^ CDC20 cell division cycle 20 homolog (S. cerevisiae) ^ 991</a>                  | -4.212744304 | -0.906666667 | 0.215219961       | 0.533416121 | 4.42580583 |
| 4728  | AGI_HUM1_OLIGO_A_23_P143218 | <a href="#">PTE1 ^ Peroxisomal acyl-CoA thioesterase ^ 10005</a>                                    | -4.203187275 | -0.954333333 | 0.22704992        | 0.516080014 | 4.42580583 |
| 13128 | AGI_HUM1_OLIGO_A_23_P31477  | <a href="#">KIAA1068 ^ KIAA1068 protein ^ 23386</a>                                                 | -4.197420748 | -1.420333333 | 0.338382406       | 0.373625976 | 4.42580583 |
| 2096  | AGI_HUM1_OLIGO_A_23_P119337 | <a href="#">ATF5 ^ Activating transcription factor 5 ^ 22809</a>                                    | -4.194867974 | -1.800333333 | 0.429175208       | 0.287108245 | 4.42580583 |
| 38838 | AGI_OLIGO_NM_006297_1_1841  | <a href="#">XRCC1 ^ X-ray repair complementing defective repair in Chinese hamster cells 1 ^ 75</a> | -4.187540728 | -0.672       | 0.160476051       | 0.627635996 | 4.42580583 |
| 6172  | AGI_HUM1_OLIGO_A_23_P156198 | <a href="#">PHF15 ^ PHD finger protein 15 ^ 23338</a>                                               | -4.178598571 | -1.091666667 | 0.261251864       | 0.469218998 | 4.42580583 |
| 28031 | AGI_HUM1_OLIGO_A_24_P313744 | <a href="#">USP14 ^ Ubiquitin specific protease 14 (tRNA-guanine transglycosylase) ^ 9097</a>       | -4.175995103 | -0.976666667 | 0.233876392       | 0.508152466 | 4.42580583 |
| 37750 | AGI_OLIGO_NM_001101_2_1456  | <a href="#">ACTB ^ Actin, beta ^ 60</a>                                                             | -4.160690398 | -0.526666667 | 0.126581556       | 0.694156725 | 4.42580583 |
| 20206 | AGI_HUM1_OLIGO_A_23_P59602  | <a href="#">FLJ20323 ^ Hypothetical protein FLJ20323 ^ 54468</a>                                    | -4.156155933 | -0.963333333 | 0.231784695       | 0.512870561 | 4.42580583 |
| 35925 | AGI_HUM1_OLIGO_A_32_P98313  | <a href="#">NDUFA4 ^ NADH dehydrogenase (ubiquinone) 1 alpha subcomplex, 4, 9kDa ^ 4697</a>         | -4.153762337 | -0.979       | 0.235689941       | 0.507331273 | 4.42580583 |
| 6511  | AGI_HUM1_OLIGO_A_23_P15937  | <a href="#">SMAD2 ^ SMAD, mothers against DPP homolog 2 (Drosophila) ^ 4087</a>                     | -4.149046006 | -0.673333333 | 0.162286302       | 0.627056205 | 4.42580583 |
| 6560  | AGI_HUM1_OLIGO_A_23_P159877 | <a href="#">RAB39B ^ RAB39B, member RAS oncogene family ^ 116442</a>                                | -4.147567816 | -1.735       | 0.418317452       | 0.300409012 | 4.42580583 |
| 23356 | AGI_HUM1_OLIGO_A_23_P89020  | <a href="#">AARS ^ Alanyl-tRNA synthetase ^ 16</a>                                                  | -4.145388502 | -1.001333333 | 0.241553556       | 0.499538115 | 4.42580583 |
| 39233 | AGI_OLIGO_NM_016354_2_1925  | <a href="#">SLCO4A1 ^ Solute carrier organic anion transporter family, member 4A1 ^ 28231</a>       | -4.143603804 | -1.279       | 0.308668507       | 0.412081042 | 4.42580583 |
| 18404 | AGI_HUM1_OLIGO_A_23_P44758  | <a href="#">HYPB ^ Huntingtin interacting protein B ^ 29072</a>                                     | -4.133131667 | -0.463       | 0.112021595       | 0.725476104 | 4.42580583 |
| 4213  | AGI_HUM1_OLIGO_A_23_P13872  | <a href="#">MLF2 ^ Myeloid leukemia factor 2 ^ 8079</a>                                             | -4.124040509 | -0.605666667 | 0.146862444       | 0.657167634 | 4.42580583 |
| 37747 | AGI_OLIGO_NM_001089_1_6034  | <a href="#">ABCA3 ^ ATP-binding cassette, sub-family A (ABC1), member 3 ^ 21</a>                    | -4.120670239 | -1.245333333 | 0.302216208       | 0.421810428 | 4.42580583 |
| 763   | AGI_HUM1_OLIGO_A_23_P106661 | <a href="#">CKLSF1 ^ Chemokine-like factor super family 1 ^ 113540</a>                              | -4.118451453 | -1.414666667 | 0.343494802       | 0.375096403 | 4.42580583 |
| 23222 | AGI_HUM1_OLIGO_A_23_P87827  | <a href="#">MGC5139 ^ Hypothetical protein MGC5139 ^ 84747</a>                                      | -4.118035622 | -0.706666667 | 0.171602854       | 0.612734221 | 4.42580583 |
| 23856 | AGI_HUM1_OLIGO_A_23_P93623  | <a href="#">ATP6V1F ^ ATPase, H+ transporting, lysosomal 14kDa, V1 subunit F ^ 9296</a>             | -4.103151572 | -0.646       | 0.157439955       | 0.639049682 | 4.42580583 |

Supplementary Table S1. SAM between Lung mets and Parental models microarrays

List of Significant Genes for Delta = 1.311: Positive genes (934) and Negative genes (297)

| Row   | Gene ID                     | Gene Name                                                                                               | Score(d)     | Numerator(r) | Denominator(s+s0) | Fold Change | q-value(%) |
|-------|-----------------------------|---------------------------------------------------------------------------------------------------------|--------------|--------------|-------------------|-------------|------------|
| 5181  | AGI_HUM1_OLIGO_A_23_P147314 | <a href="#">PCDH11Y ^ Protocadherin 11 Y-linked ^ 83259</a>                                             | -4.099641338 | -1.409       | 0.343688602       | 0.376572617 | 4.42580583 |
| 39702 | AGI_OLIGO_NM_145058_1_897   | <a href="#">^ ^</a>                                                                                     | -4.098809474 | -1.189333333 | 0.290165557       | 0.438505446 | 4.42580583 |
| 10065 | AGI_HUM1_OLIGO_A_23_P215406 | <a href="#">RAC1 ^ Ras-related C3 botulinum toxin substrate 1 (rho family, small GTP binding pro</a>    | -4.0971428   | -0.985666667 | 0.240574155       | 0.504992313 | 4.42580583 |
| 21930 | AGI_HUM1_OLIGO_A_23_P75622  | <a href="#">ATP5L ^ ATP synthase, H+ transporting, mitochondrial F0 complex, subunit g ^ 10632</a>      | -4.095736197 | -0.885666667 | 0.216241141       | 0.54123736  | 4.42580583 |
| 30648 | AGI_HUM1_OLIGO_A_24_P678104 | <a href="#">STMN3 ^ Stathmin-like 3 ^ 50861</a>                                                         | -4.089035396 | -1.566       | 0.382975408       | 0.337743521 | 4.42580583 |
| 19970 | AGI_HUM1_OLIGO_A_23_P57413  | <a href="#">PPM1F ^ Protein phosphatase 1F (PP2C domain containing) ^ 9647</a>                          | -4.084716116 | -2.044291667 | 0.500473377       | 0.242441459 | 4.42580583 |
| 23337 | AGI_HUM1_OLIGO_A_23_P88840  | <a href="#">FLJ20399 ^ Hypothetical protein FLJ20399 ^ 54920</a>                                        | -4.082545757 | -0.904666667 | 0.221593761       | 0.534156106 | 4.42580583 |
| 19036 | AGI_HUM1_OLIGO_A_23_P50096  | <a href="#">TYMS ^ Thymidylate synthetase ^ 7298</a>                                                    | -4.082298399 | -0.536666667 | 0.131461891       | 0.689361834 | 4.42580583 |
| 8735  | AGI_HUM1_OLIGO_A_23_P20480  | <a href="#">BRF2 ^ BRF2, subunit of RNA polymerase III transcription initiation factor, BRF1-like ^</a> | -4.07672706  | -0.929       | 0.227878881       | 0.525222272 | 4.42580583 |
| 10049 | AGI_HUM1_OLIGO_A_23_P215269 | <a href="#">GNA12 ^ Guanine nucleotide binding protein (G protein) alpha 12 ^ 2768</a>                  | -4.074117044 | -1.033333333 | 0.253633689       | 0.488579984 | 4.42580583 |
| 31565 | AGI_HUM1_OLIGO_A_24_P916195 | <a href="#">GTSE1 ^ G-2 and S-phase expressed 1 ^ 51512</a>                                             | -4.071251955 | -1.545333333 | 0.379572021       | 0.342616531 | 4.42580583 |
| 15186 | AGI_HUM1_OLIGO_A_23_P363344 | <a href="#">TPM1 ^ Tropomyosin 1 (alpha) ^ 7168</a>                                                     | -4.065294858 | -0.781333333 | 0.192195981       | 0.581828821 | 4.42580583 |
| 14637 | AGI_HUM1_OLIGO_A_23_P35075  | <a href="#">SESN2 ^ Sestrin 2 ^ 83667</a>                                                               | -4.061449393 | -1.76        | 0.433342836       | 0.295248165 | 4.42580583 |
| 25624 | AGI_HUM1_OLIGO_A_24_P163537 | <a href="#">HNLF ^ Putative NFkB activating protein HNLF ^ 222068</a>                                   | -4.059829203 | -0.690333333 | 0.170039994       | 0.61971065  | 4.42580583 |
| 38360 | AGI_OLIGO_NM_003695_1_631   | <a href="#">LY6D ^ Lymphocyte antigen 6 complex, locus D ^ 8581</a>                                     | -4.057931017 | -2.217       | 0.546337528       | 0.215088158 | 4.42580583 |
| 26385 | AGI_HUM1_OLIGO_A_24_P21044  | <a href="#">MGC10911 ^ Hypothetical protein MGC10911 ^ 84262</a>                                        | -4.057110481 | -1.095       | 0.26989652        | 0.468136124 | 4.42580583 |
| 35396 | AGI_HUM1_OLIGO_A_32_P65934  | <a href="#">OPRS1 ^ Opioid receptor, sigma 1 ^ 10280</a>                                                | -4.053001963 | -1.886083333 | 0.465354656       | 0.270540534 | 4.42580583 |
| 16825 | AGI_HUM1_OLIGO_A_23_P401904 | <a href="#">^ ^</a>                                                                                     | -4.037911737 | -1.052333333 | 0.260613258       | 0.48218767  | 4.81015426 |
| 34691 | AGI_HUM1_OLIGO_A_32_P32254  | <a href="#">COL6A1 ^ Collagen, type VI, alpha 1 ^ 1291</a>                                              | -4.033948533 | -1.746666667 | 0.432991808       | 0.297989486 | 4.81015426 |
| 15696 | AGI_HUM1_OLIGO_A_23_P375    | <a href="#">CDCA8 ^ Cell division cycle associated 8 ^ 55143</a>                                        | -4.027762679 | -1.316666667 | 0.326897777       | 0.401461441 | 4.81015426 |
| 22825 | AGI_HUM1_OLIGO_A_23_P83939  | <a href="#">SYAP1 ^ Synapse associated protein 1, SAP47 homolog (Drosophila) ^ 94056</a>                | -4.021557964 | -1.232666667 | 0.306514708       | 0.425530172 | 4.81015426 |
| 25793 | AGI_HUM1_OLIGO_A_24_P174563 | <a href="#">GRPEL1 ^ GrpE-like 1, mitochondrial (E. coli) ^ 80273</a>                                   | -4.013444942 | -1.093666667 | 0.272500728       | 0.468568973 | 4.81015426 |
| 13488 | AGI_HUM1_OLIGO_A_23_P322701 | <a href="#">C14orf24 ^ Chromosome 14 open reading frame 24 ^ 283635</a>                                 | -4.010371008 | -0.775       | 0.193248953       | 0.584388624 | 4.81015426 |
| 39668 | AGI_OLIGO_NM_138338_1_238   | <a href="#">^ ^</a>                                                                                     | -4.010017838 | -0.568       | 0.141645255       | 0.674551267 | 4.81015426 |
| 24504 | AGI_HUM1_OLIGO_A_23_P99604  | <a href="#">KIAA1333 ^ KIAA1333 ^ 55632</a>                                                             | -4.000343878 | -1.643       | 0.410714691       | 0.320189965 | 4.81015426 |
| 5406  | AGI_HUM1_OLIGO_A_23_P149497 | <a href="#">FLJ10307 ^ Hypothetical protein FLJ10307 ^ 55113</a>                                        | -3.999876693 | -0.678       | 0.169505225       | 0.625031151 | 4.81015426 |
| 38628 | AGI_OLIGO_NM_005088_1_2509  | <a href="#">DXYS155E ^ DNA segment on chromosome X and Y (unique) 155 expressed sequence</a>            | -3.994744899 | -1.144666667 | 0.28654312        | 0.452294179 | 4.81015426 |
| 12460 | AGI_HUM1_OLIGO_A_23_P29851  | <a href="#">LRPAP1 ^ Low density lipoprotein receptor-related protein associated protein 1 ^ 402</a>    | -3.993207039 | -1.183666667 | 0.296420059       | 0.44023121  | 4.81015426 |
| 1194  | AGI_HUM1_OLIGO_A_23_P110686 | <a href="#">STC2 ^ Stanniocalcin 2 ^ 8614</a>                                                           | -3.992622528 | -0.727333333 | 0.182169321       | 0.604019347 | 4.81015426 |
| 39226 | AGI_OLIGO_NM_016311_3_416   | <a href="#">ATPIF1 ^ ATPase inhibitory factor 1 ^ 93974</a>                                             | -3.987973713 | -1.184       | 0.296892629       | 0.440129507 | 4.81015426 |
| 26359 | AGI_HUM1_OLIGO_A_24_P208794 | <a href="#">APEH ^ N-acylaminoacyl-peptide hydrolase ^ 327</a>                                          | -3.980020706 | -0.734666667 | 0.184588654       | 0.600956859 | 4.81015426 |
| 26051 | AGI_HUM1_OLIGO_A_24_P190168 | <a href="#">MAC30 ^ Hypothetical protein MAC30 ^ 27346</a>                                              | -3.976914582 | -0.856666667 | 0.215409873       | 0.552227    | 4.81015426 |
| 13321 | AGI_HUM1_OLIGO_A_23_P31921  | <a href="#">ASS ^ Argininosuccinate synthetase ^ 445</a>                                                | -3.970721185 | -1.507333333 | 0.379611981       | 0.35176081  | 4.81015426 |
| 10297 | AGI_HUM1_OLIGO_A_23_P217339 | <a href="#">PRKX ^ Protein kinase, X-linked ^ 5613</a>                                                  | -3.968382077 | -1.563333333 | 0.393947282       | 0.338368381 | 4.81015426 |
| 38794 | AGI_OLIGO_NM_006111_1_727   | <a href="#">ACAA2 ^ Acetyl-Coenzyme A acyltransferase 2 (mitochondrial 3-oxoacyl-Coenzyme A</a>         | -3.967228448 | -0.994666667 | 0.250720794       | 0.501851813 | 4.81015426 |
| 28833 | AGI_HUM1_OLIGO_A_24_P361006 | <a href="#">NDUFA9 ^ NADH dehydrogenase (ubiquinone) 1 alpha subcomplex, 9, 39kDa ^ 4704</a>            | -3.962680879 | -0.617333333 | 0.15578679        | 0.651874735 | 4.81015426 |
| 38868 | AGI_OLIGO_NM_006461_1_3603  | <a href="#">SPAG5 ^ Sperm associated antigen 5 ^ 10615</a>                                              | -3.960883387 | -0.845333333 | 0.213420404       | 0.556582196 | 4.81015426 |
| 25244 | AGI_HUM1_OLIGO_A_24_P139773 | <a href="#">PPP1R8 ^ Protein phosphatase 1, regulatory (inhibitor) subunit 8 ^ 5511</a>                 | -3.954832705 | -1.059533333 | 0.267908509       | 0.479787231 | 4.81015426 |
| 14336 | AGI_HUM1_OLIGO_A_23_P343808 | <a href="#">SOS1 ^ Son of sevenless homolog 1 (Drosophila) ^ 6654</a>                                   | -3.952336757 | -0.877144444 | 0.221930594       | 0.544443995 | 4.81015426 |

Estimated Miss rates for Delta=1.310630712934

| Quantiles   | Cutpoints        | Miss Rate(%) |
|-------------|------------------|--------------|
| 0 -> 0.05   | -3.929 -> -1.958 | 65.34        |
| 0.05 -> 0.1 | -1.958 -> -1.425 | 42.49        |
| 0.1 -> 0.15 | -1.425 -> -1.133 | 31.41        |

Supplementary Table S1. SAM between Lung mets and Parental models microarrays

List of Significant Genes for Delta = 1.311: Positive genes (934) and Negative genes (297)

| Row | Gene ID      | Gene Name        | Score(d) | Numerator(r) | Denominator(s+s0) | Fold Change | q-value(%) |
|-----|--------------|------------------|----------|--------------|-------------------|-------------|------------|
|     | 0.15 -> 0.2  | -1.133 -> -0.928 |          |              |                   |             |            |
|     | 0.2 -> 0.25  | -0.928 -> -0.757 | 25.46    |              |                   |             |            |
|     | 0.25 -> 0.75 | -0.757 -> 0.771  | 16.73    |              |                   |             |            |
|     | 0.75 -> 0.8  | 0.771 -> 0.968   | 0.95     |              |                   |             |            |
|     | 0.8 -> 0.85  | 0.968 -> 1.211   | 7.83     |              |                   |             |            |
|     | 0.85 -> 0.9  | 1.211 -> 1.539   | 19.36    |              |                   |             |            |
|     | 0.9 -> 0.95  | 1.539 -> 2.05    | 35.36    |              |                   |             |            |
|     | 0.95 -> 1    | 2.05 -> 3.271    | 54.53    |              |                   |             |            |
|     |              |                  | 73.29    |              |                   |             |            |

Current settings

Input parameters

|                                                |                    |
|------------------------------------------------|--------------------|
| Data type?                                     | Two class unpaired |
| Arrays centered?                               | FALSE              |
| Delta                                          | 1.31063071         |
| Minimum fold change                            | 0                  |
| Test statistic                                 | standard           |
| Are data are log scale?                        | TRUE               |
| Number of permutations                         | 100                |
| Input percentile for exchangeability factor s0 | Automatic choice   |
| Number of neighbors for KNN                    | 10                 |
| Seed for Random number generator               | 1234567            |

Computed values

|                                            |            |
|--------------------------------------------|------------|
| Estimate of pi0 (proportion of null genes) | 0.78950665 |
| Exchangibility factor s0                   | 0.07928697 |
| s0 percentile                              | 5.00112751 |
| False Discovery Rate (%)                   | 4.81015426 |
