# Supplementary material
Source: PubMed Central journal article supplement (PMC4310213)
Supplement: NIHMS637782-supplement-4.pdf [file NIHMS637782-supplement-4.pdf]

Analysis Name: greene - 2013-06-29 05:42 PM

Analysis Creation Date: 2013-06-29

Build version: 220217

Content version: 16542223 (Release Date: 2013-05-13)

## Analysis settings

### View

Reference set: Ingenuity Knowledge Base (Genes Only)

Relationship to include: Direct and Indirect

Includes Endogenous Chemicals

Optional Analyses: My Pathways My List

### Filter Summary:

Consider only molecules and/or relationships where

(species = Human) AND

(confidence = Experimentally Observed)

Cutoff:

## Top Networks

| ID | Associated Network Functions                         | Score |
|----|------------------------------------------------------|-------|
| 1  | Gene Expression, Cell Morphology, Tissue Development | 36    |
| 2  | Cell Cycle, Cancer, Reproductive System Disease      | 34    |

|   |                                                                                    |    |
|---|------------------------------------------------------------------------------------|----|
| 3 | Connective Tissue Disorders, Inflammatory Disease, Skeletal and Muscular Disorders | 32 |
| 4 | Cancer, Cellular Movement, Organismal Injury and Abnormalities                     | 28 |
| 5 | Cell Cycle, Cancer, Cell Morphology                                                | 28 |

## Top Bio Functions

### Diseases and Disorders

| Name                                   | p-value             | # Molecules |
|----------------------------------------|---------------------|-------------|
| Cancer                                 | 1.46E-06 - 2.68E-02 | 255         |
| Reproductive System Disease            | 1.46E-06 - 2.68E-02 | 68          |
| Skeletal and Muscular Disorders        | 1.87E-05 - 2.68E-02 | 80          |
| Gastrointestinal Disease               | 2.17E-04 - 2.68E-02 | 92          |
| Dermatological Diseases and Conditions | 1.46E-03 - 2.68E-02 | 57          |

### Molecular and Cellular Functions

| Name                              | p-value             | # Molecules |
|-----------------------------------|---------------------|-------------|
| Cellular Growth and Proliferation | 8.08E-09 - 2.68E-02 | 123         |
| Cellular Development              | 1.46E-08 - 2.68E-02 | 93          |
| Cell Death and Survival           | 6.05E-08 - 2.68E-02 | 112         |
| Cell Cycle                        | 6.15E-08 - 2.68E-02 | 68          |
| Cellular Movement                 | 4.39E-07 - 2.68E-02 | 80          |

### Physiological System Development and Function

| Name                                           | p-value             | # Molecules |
|------------------------------------------------|---------------------|-------------|
| Cardiovascular System Development and Function | 1.31E-06 - 2.68E-02 | 35          |
| Organismal Development                         | 4.16E-06 - 2.52E-02 | 29          |
| Tissue Development                             | 5.60E-05 - 2.68E-02 | 38          |
| Reproductive System Development and Function   | 2.13E-04 - 2.68E-02 | 19          |
| Tissue Morphology                              | 6.20E-04 - 2.68E-02 | 12          |

## Top Canonical Pathways

| Name                                                      | p-value  | Ratio         |
|-----------------------------------------------------------|----------|---------------|
| Antigen Presentation Pathway                              | 4.91E-06 | 8/40 (0.2)    |
| Cytotoxic T Lymphocyte-mediated Apoptosis of Target Cells | 3.09E-04 | 7/52 (0.135)  |
| Cell Cycle: G2/M DNA Damage Checkpoint Regulation         | 9.48E-04 | 6/48 (0.125)  |
| Allograft Rejection Signaling                             | 1.7E-03  | 6/59 (0.102)  |
| Sphingosine-1-phosphate Signaling                         | 2.49E-03 | 9/115 (0.078) |

## Top Molecules

### Log Ratio up-regulated

| Molecules | Exp. Value | Exp. Chart |
|-----------|------------|------------|
| HEPH      | ↑11.566    |            |
| BASP1*    | ↑11.203    |            |
| IFI16     | ↑11.141    |            |
| FMN2      | ↑9.484     |            |
| PCTP      | ↑9.139     |            |
| HLA-DRB1  | ↑9.124     |            |
| TMEM35    | ↑8.608     |            |
| LDOC1     | ↑8.296     |            |
| KLF8      | ↑7.970     |            |
| SERPING1  | ↑7.751     |            |

### Log Ratio down-regulated

| Molecules | Exp. Value | Exp. Chart |
|-----------|------------|------------|
| MAGEC2    | ↓-11.356   |            |
| CDH4      | ↓-9.054    |            |
| OLFM1*    | ↓-6.344    |            |

|         |         |
|---------|---------|
| FOXI1   | ↓-5.158 |
| RAB39B  | ↓-4.875 |
| COL6A1* | ↓-4.256 |
| STC2    | ↓-3.334 |
| LY6D    | ↓-3.080 |
| DHRS3   | ↓-2.740 |
| SLC4A8  | ↓-2.701 |

### Top Upstream Regulators

| Upstream Regulator | p-value of overlap | Predicted Activation State |
|--------------------|--------------------|----------------------------|
| TP53               | 2.23E-12           | Activated                  |
| ESR2               | 2.87E-09           |                            |
| NLRC5              | 4.10E-08           | Activated                  |
| MAPK1              | 2.14E-06           | Inhibited                  |
| CDKN1A             | 3.07E-06           |                            |

**Top My Lists**

| Name | p-value | Ratio |
|------|---------|-------|
|------|---------|-------|

**Top My Pathways**

| Name | p-value | Ratio |
|------|---------|-------|
|------|---------|-------|

**Top Tox Lists**

| Name                                                                 | p-value  | Ratio         |
|----------------------------------------------------------------------|----------|---------------|
| <a href="#">Liver Proliferation</a>                                  | 1.01E-04 | 16/200 (0.08) |
| <a href="#">Persistent Renal Ischemia-Reperfusion Injury (Mouse)</a> | 4.63E-04 | 5/25 (0.2)    |
| <a href="#">Acute Renal Failure Panel (Rat)</a>                      | 7.11E-04 | 7/56 (0.125)  |
| <a href="#">Cell Cycle: G2/M DNA Damage Checkpoint Regulation</a>    | 1.21E-03 | 6/45 (0.133)  |
| <a href="#">Renal Ischemic Resistance Panel (Rat)</a>                | 2E-03    | 3/10 (0.3)    |

## Top Tox Functions

### Assays: Clinical Chemistry and Hematology

| Name                                     | p-value             | # Molecules |
|------------------------------------------|---------------------|-------------|
| Increased Levels of Alkaline Phosphatase | 5.07E-01 - 5.07E-01 | 1           |

### Cardiotoxicity

| Name                     | p-value             | # Molecules |
|--------------------------|---------------------|-------------|
| Cardiac Arrythmia        | 2.68E-02 - 1.00E00  | 2           |
| Cardiac Damage           | 2.68E-02 - 2.68E-02 | 1           |
| Cardiac Degeneration     | 2.68E-02 - 2.68E-02 | 1           |
| Cardiac Stenosis         | 2.68E-02 - 2.68E-02 | 1           |
| Congenital Heart Anomaly | 2.68E-02 - 4.99E-01 | 2           |

### Hepatotoxicity

| Name                                 | p-value             | # Molecules |
|--------------------------------------|---------------------|-------------|
| Liver Damage                         | 6.81E-03 - 2.59E-01 | 3           |
| Liver Hyperplasia/Hyperproliferation | 8.70E-03 - 4.12E-02 | 23          |
| Liver Proliferation                  | 1.78E-02 - 2.38E-01 | 3           |
| Hepatocellular Carcinoma             | 4.12E-02 - 4.12E-02 | 16          |
| Liver Inflammation/Hepatitis         | 4.96E-02 - 4.65E-01 | 5           |

### Nephrotoxicity

| Name                      | p-value             | # Molecules |
|---------------------------|---------------------|-------------|
| Renal Inflammation        | 2.68E-02 - 4.20E-01 | 2           |
| Renal Nephritis           | 2.68E-02 - 4.20E-01 | 2           |
| Kidney Failure            | 5.29E-02 - 1.00E00  | 3           |
| Renal Necrosis/Cell Death | 6.65E-02 - 1.00E00  | 13          |

Renal Proliferation

1.10E-01 - 3.53E-01

7
