# Supplementary material
Source: PubMed Central journal article supplement (PMC4310213)
Supplement: NIHMS637782-supplement-5.pdf [file NIHMS637782-supplement-5.pdf]

**Supplementary Table S3. Differentially expressed miRNAs between the Met-derived tumors and Parental primary tumors.**

| Change Direction   | miRNA              | Met-derived versus Parental (n=4) |         | Fold Change |
|--------------------|--------------------|-----------------------------------|---------|-------------|
|                    |                    | $\Delta\Delta\text{CT}$           | p       |             |
| <b>UP (27)</b>     | hsa-miR-200a       | -10.053                           | 0.00000 | 1062.47     |
|                    | hsa-miR-674        | -7.012                            | 0.01053 | 129.10      |
|                    | hsa-miR-429        | -6.047                            | 0.01394 | 66.12       |
|                    | hsa-miR-873        | -5.591                            | 0.00776 | 48.20       |
|                    | <b>hsa-miR-138</b> | -4.492                            | 0.03000 | 22.50       |
|                    | hsa-miR-216b       | -4.029                            | 0.00002 | 16.33       |
|                    | hsa-miR-29a        | -3.257                            | 0.00700 | 9.56        |
|                    | hsa-miR-30c        | -3.011                            | 0.00167 | 8.06        |
|                    | mmu-miR-140        | -2.763                            | 0.02700 | 6.79        |
|                    | hsa-miR-193a-5p    | -2.538                            | 0.03749 | 5.81        |
|                    | hsa-miR-486        | -2.523                            | 0.03700 | 5.75        |
|                    | hsa-miR-146a       | -2.503                            | 0.02800 | 5.67        |
|                    | hsa-miR-628-5p     | -2.488                            | 0.02000 | 5.61        |
|                    | hsa-miR-212        | -2.257                            | 0.03100 | 4.78        |
|                    | hsa-miR-26a        | -2.256                            | 0.01900 | 4.78        |
|                    | hsa-miR-545        | -2.099                            | 0.00146 | 4.28        |
|                    | hsa-miR-532        | -2.010                            | 0.00016 | 4.03        |
|                    | hsa-miR-92a        | -2.008                            | 0.02600 | 4.02        |
|                    | hsa-miR-136        | -2.007                            | 0.05000 | 4.02        |
|                    | hsa-miR-26b        | -2.006                            | 0.00005 | 4.02        |
|                    | hsa-miR-143        | -2.002                            | 0.05000 | 4.01        |
|                    | hsa-miR-32         | -1.753                            | 0.04600 | 3.37        |
|                    | hsa-miR-106b       | -1.043                            | 0.00007 | 2.06        |
|                    | hsa-miR-30b        | -1.017                            | 0.00045 | 2.02        |
|                    | hsa-miR-744        | -1.017                            | 0.00026 | 2.02        |
|                    | hsa-miR-200c       | -1.011                            | 0.00029 | 2.01        |
|                    | <b>Down (5)</b>    | hsa-miR-708                       | 8.559   | 0.01906     |
| hsa-miR-487a       |                    | 5.473                             | 0.00603 | 0.0225      |
| hsa-miR-224        |                    | 2.576                             | 0.03085 | 0.1677      |
| hsa-miR-672        |                    | 2.568                             | 0.03102 | 0.1686      |
| hsa-miR-127-5p     |                    | 2.536                             | 0.03191 | 0.1724      |
| <b>Control (3)</b> | RNU44              | 0.001                             | 0.96400 |             |
|                    | RNU48              | -0.001                            | 0.96400 |             |
|                    | U6rRNA             | 0.000                             |         |             |

MiRNA expression levels were measured by real-time PCR with the pool A reverse-transcription primers and 384 individual Taqman miR primers (Applied Biosystems). The expression changes ( $\Delta\Delta\text{CT}$ ) between the parental and met-derived tumors are standardized based on U6rRNA and the internal loading controls include RNU44 and RNU48.
