# Supplementary material
Source: PubMed Central journal article supplement (PMC4310213)
Supplement: NIHMS637782-supplement-6.pdf [file NIHMS637782-supplement-6.pdf]

**Supplementary Table S4.**  
**Putative miR Promoter Analysis for Transcription Factor (TF) Binding Sites**

[http://jaspar.genereg.net/cgi-bin/jaspar\\_db.pl](http://jaspar.genereg.net/cgi-bin/jaspar_db.pl)

**miR-138-1 -3kb region (1-3,001)**

9 putative sites were predicted with these settings (100%) in sequence named **hg18\_dna**

| <i>Model ID</i> | <i>Model name</i> | <i>Score</i> | <i>Relative score</i> | <i>Start</i> | <i>End</i> | <i>Strand</i> | <i>predicted site sequence</i> |
|-----------------|-------------------|--------------|-----------------------|--------------|------------|---------------|--------------------------------|
| MA0095.1        | YY1               | 8.383        | 0.999993345000489     | 154          | 159        | -1            | GCCATC                         |
| MA0095.1        | YY1               | 8.383        | 0.999993345000489     | 291          | 296        | -1            | GCCATC                         |
| MA0081.1        | SPIB              | 10.470       | 1.00001471989147      | 322          | 328        | 1             | AGAGGAA                        |
| MA0081.1        | SPIB              | 10.470       | 1.00001471989147      | 945          | 951        | 1             | AGAGGAA                        |
| MA0095.1        | YY1               | 8.383        | 0.999993345000489     | 1126         | 1131       | -1            | GCCATC                         |
| MA0133.1        | BRCA1             | 8.351        | 1.00001505763814      | 1311         | 1317       | -1            | ACAACAC                        |
| MA0037.1        | GATA3             | 8.388        | 0.999994892993597     | 1683         | 1688       | 1             | AGATAG                         |
| MA0037.1        | GATA3             | 8.388        | 0.999994892993597     | 1877         | 1882       | 1             | AGATAG                         |
| MA0095.1        | YY1               | 8.383        | 0.999993345000489     | 1882         | 1887       | -1            | GCCATC                         |

**miR-138-2 -3kb region (1-3,001)**

5 putative sites were predicted with these settings (100%) in sequence named **hg18\_dna**

| <i>Model ID</i> | <i>Model name</i> | <i>Score</i> | <i>Relative score</i> | <i>Start</i> | <i>End</i> | <i>Strand</i> | <i>predicted site sequence</i> |
|-----------------|-------------------|--------------|-----------------------|--------------|------------|---------------|--------------------------------|
| MA0037.1        | GATA3             | 8.388        | 0.999994892993597     | 358          | 363        | 1             | AGATAG                         |
| MA0095.1        | YY1               | 8.383        | 0.999993345000489     | 883          | 888        | -1            | GCCATC                         |
| MA0037.1        | GATA3             | 8.388        | 0.999994892993597     | 2380         | 2385       | -1            | AGATAG                         |
| MA0037.1        | GATA3             | 8.388        | 0.999994892993597     | 2546         | 2551       | -1            | AGATAG                         |
| MA0133.1        | BRCA1             | 8.351        | 1.00001505763814      | 2891         | 2897       | 1             | ACAACAC                        |
