# Supplementary material
Source: PubMed Central journal article supplement (PMC4310213)
Supplement: NIHMS637782-supplement-7.pdf [file NIHMS637782-supplement-7.pdf]

Supplementary Table S5. SAM between miR-138 expressing cells and control cells

|       |                              |                                                                                            | Positive genes (3)   |              |                   |             |            |
|-------|------------------------------|--------------------------------------------------------------------------------------------|----------------------|--------------|-------------------|-------------|------------|
| Row   | Gene ID                      | Gene Name                                                                                  | Score(d)             | Numerator(r) | Denominator(s+s0) | Fold Change | q-value(%) |
| 5281  | AGI_HUM1_OLIGO_A_23_P148175  | FRMD4B ^ FERM domain containing 4B ^ 23150                                                 | 8.891251624          | 1.476259259  | 0.166035033       | 2.782263885 | 0          |
| 35147 | AGI_HUM1_OLIGO_A_32_P47754   | SLC2A14 ^ Solute carrier family 2 (facilitated glucose transporter), member 3 ^ 144195     | 6.218260998          | 1.697166667  | 0.272932684       | 3.242635062 | 3.79547861 |
| 22089 | AGI_HUM1_OLIGO_A_23_P76731   | RAGE ^ Renal tumor antigen ^ 5891                                                          | 4.905690362          | 0.785166667  | 0.160052227       | 1.72329139  | 7.85271438 |
|       |                              |                                                                                            | Negative genes (121) |              |                   |             |            |
| Row   | Gene ID                      | Gene Name                                                                                  | Score(d)             | Numerator(r) | Denominator(s+s0) | Fold Change | q-value(%) |
| 17132 | AGI_HUM1_OLIGO_A_23_P408913  | FLJ30990 ^ Hypothetical protein FLJ30990 ^ 150737                                          | -13.42362905         | -2.765333333 | 0.206004898       | 0.147079356 | 0          |
| 22142 | AGI_HUM1_OLIGO_A_23_P77192   | ^ ^                                                                                        | -7.473541761         | -0.765237134 | 0.102392836       | 0.588356653 | 0          |
| 37434 | AGI_OLIGO_NKI_NM_007036      | ESM1 ^ Endothelial cell-specific molecule 1 ^ 11082                                        | -7.353800827         | -2.9739038   | 0.404403637       | 0.127281637 | 0          |
| 15110 | AGI_HUM1_OLIGO_A_23_P361014  | ZNF537 ^ Zinc finger protein 537 ^ 57616                                                   | -6.453194027         | -0.953237134 | 0.147715554       | 0.516472295 | 0          |
| 18428 | AGI_HUM1_OLIGO_A_23_P44724   | CSR2 ^ Cysteine and glycine-rich protein 2 ^ 1466                                          | -6.421072015         | -2.068333333 | 0.322116514       | 0.238434791 | 0          |
| 23767 | AGI_HUM1_OLIGO_A_23_P92410   | CASP3 ^ Caspase 3, apoptosis-related cysteine protease ^ 836                               | -6.147096129         | -1.183333333 | 0.192502819       | 0.440332937 | 0          |
| 21195 | AGI_HUM1_OLIGO_A_23_P68486   | C20orf108 ^ Chromosome 20 open reading frame 108 ^ 116151                                  | -6.120984181         | -1.133666667 | 0.185209867       | 0.45575593  | 0          |
| 12358 | AGI_HUM1_OLIGO_A_23_P28886   | PCNA ^ Proliferating cell nuclear antigen ^ 5111                                           | -6.032195952         | -1.431666667 | 0.237337356       | 0.370702393 | 0          |
| 463   | AGI_HUM1_OLIGO_A_23_P103812  | DBCCR1L ^ DBCCR1-like ^ 339479                                                             | -5.91668844          | -1.5134375   | 0.255791312       | 0.350275624 | 0          |
| 35156 | AGI_HUM1_OLIGO_A_32_P48156   | ^ ^                                                                                        | -5.827473726         | -1.780270833 | 0.305496158       | 0.291128739 | 0          |
| 17689 | AGI_HUM1_OLIGO_A_23_P421811  | C20orf132 ^ Chromosome 20 open reading frame 132 ^ 140699                                  | -5.718632124         | -1.393166667 | 0.243618865       | 0.380728199 | 0          |
| 30477 | AGI_HUM1_OLIGO_A_24_P611182  | CENTG2 ^ Trinucleotide repeat containing 17 ^ 116987                                       | -5.705204006         | -0.967037037 | 0.169500869       | 0.511555602 | 0          |
| 16655 | AGI_HUM1_OLIGO_A_23_P397334  | PAQR4 ^ Progesterone and adipoQ receptor family member IV ^ 124222                         | -5.617642178         | -1.512333333 | 0.269211403       | 0.35054381  | 0          |
| 15411 | AGI_HUM1_OLIGO_A_23_P368484  | FLJ35696 ^ FLJ35696 protein ^ 388341                                                       | -5.611091536         | -1.027666667 | 0.183149154       | 0.490502819 | 0          |
| 32842 | AGI_HUM1_OLIGO_A_32_P115050  | ^ Homo sapiens, clone IMAGE:5311619, mRNA ^                                                | -5.57903483          | -1.735       | 0.310985691       | 0.300409012 | 0          |
| 38197 | AGI_OLIGO_NM_002592_1_533    | PCNA ^ Proliferating cell nuclear antigen ^ 5111                                           | -5.519734348         | -1.448833333 | 0.262482439       | 0.366317535 | 0          |
| 21053 | AGI_HUM1_OLIGO_A_23_P67169   | IL11 ^ Interleukin 11 ^ 3589                                                               | -5.474440635         | -2.627333333 | 0.479927267       | 0.161842977 | 0          |
| 31325 | AGI_HUM1_OLIGO_A_24_P858698  | NFIX ^ Nuclear factor I/X (CCAAT-binding transcription factor) ^ 4784                      | -5.463117108         | -1.7955      | 0.328658523       | 0.288071731 | 0          |
| 18945 | AGI_HUM1_OLIGO_A_23_P49467   | ^ ^                                                                                        | -5.4323061           | -0.761       | 0.140087835       | 0.590087172 | 0          |
| 29830 | AGI_HUM1_OLIGO_A_24_P417784  | ^ ^                                                                                        | -5.412927991         | -0.944666667 | 0.174520457       | 0.519549579 | 0          |
| 13493 | AGI_HUM1_OLIGO_A_23_P322519  | FOSL1 ^ FOS-like antigen 1 ^ 8061                                                          | -5.350057869         | -1.575833333 | 0.294545101       | 0.335449307 | 3.79547861 |
| 8714  | AGI_HUM1_OLIGO_A_23_P204536  | SEN1 ^ SUMO1/sentrin specific protease 1 ^ 29843                                           | -5.337535173         | -1.135666667 | 0.21276987        | 0.455124556 | 3.79547861 |
| 38198 | AGI_OLIGO_NM_002592_1_578    | PCNA ^ Proliferating cell nuclear antigen ^ 5111                                           | -5.130054739         | -1.364833333 | 0.266046544       | 0.388279291 | 3.79547861 |
| 1909  | AGI_HUM1_OLIGO_A_23_P11764   | EIF2C1 ^ Eukaryotic translation initiation factor 2C, 1 ^ 26523                            | -5.057101537         | -0.798833333 | 0.157962684       | 0.574813825 | 3.79547861 |
| 34600 | AGI_HUM1_OLIGO_A_32_P23854   | KIAA1608 ^ KIAA1608 ^ 57706                                                                | -4.904594771         | -1.085333333 | 0.221289094       | 0.471283366 | 3.79547861 |
| 11000 | AGI_HUM1_OLIGO_A_23_P250982  | CGI-111 ^ CGI-111 protein ^ 51015                                                          | -4.887471593         | -1.142833333 | 0.233829151       | 0.452869306 | 3.79547861 |
| 33078 | AGI_HUM1_OLIGO_A_32_P131940  | ^ ^                                                                                        | -4.73336479          | -0.9675      | 0.20440005        | 0.511391469 | 6.2821715  |
| 28955 | AGI_HUM1_OLIGO_A_24_P365365  | TCF3 ^ Transcription factor 3 (E2A immunoglobulin enhancer binding factors E12/E47) ^ 6929 | -4.692897829         | -1.059166667 | 0.225695659       | 0.479909186 | 6.2821715  |
| 25075 | AGI_HUM1_OLIGO_A_24_P126628  | ^ ^                                                                                        | -4.689539229         | -1.3145      | 0.280304724       | 0.402064816 | 6.2821715  |
| 853   | AGI_HUM1_OLIGO_A_23_P107421  | TK1 ^ Thymidine kinase 1, soluble ^ 7083                                                   | -4.657704707         | -0.98        | 0.210404064       | 0.50697974  | 6.2821715  |
| 10376 | AGI_HUM1_OLIGO_A_23_P217879  | ARID1A ^ AT rich interactive domain 1A (SWI- like) ^ 8289                                  | -4.632954949         | -1.3385      | 0.288908486       | 0.395431581 | 6.2821715  |
| 383   | AGI_HUM1_OLIGO_A_23_P103126  | GTPBP1 ^ GTP binding protein 1 ^ 9567                                                      | -4.570928653         | -1.635666667 | 0.357841216       | 0.32182166  | 6.2821715  |
| 37312 | AGI_OLIGO_NKI_CONTIG41413_RC | RRM2 ^ Ribonucleotide reductase M2 polypeptide ^ 6241                                      | -4.531863527         | -1.118333333 | 0.246771185       | 0.460625654 | 7.19143316 |
| 8353  | AGI_HUM1_OLIGO_A_23_P201649  | C1orf16 ^ Chromosome 1 open reading frame 16 ^ 9887                                        | -4.503866273         | -0.815       | 0.180955639       | 0.568408487 | 7.19143316 |
| 38558 | AGI_OLIGO_NM_004456_3_2590   | EZH2 ^ Enhancer of zeste homolog 2 (Drosophila) ^ 2146                                     | -4.4905603           | -1.406       | 0.31310124        | 0.377356492 | 7.19143316 |
| 12670 | AGI_HUM1_OLIGO_A_23_P303876  | APOBEC3A ^ Apolipoprotein B mRNA editing enzyme, catalytic polypeptide-like 3A ^ 200315    | -4.471925519         | -1.107666667 | 0.247693452       | 0.464043943 | 7.19143316 |
| 37964 | AGI_OLIGO_NM_001760_2_1618   | CNND3 ^ Cyclin D3 ^ 896                                                                    | -4.442392242         | -1.6345      | 0.367932391       | 0.322082013 | 7.19143316 |
| 26299 | AGI_HUM1_OLIGO_A_24_P203103  | SH2D1A ^ SH2 domain protein 1A, Duncan's disease (lymphoproliferative syndrome) ^ 4068     | -4.408651268         | -1.580307407 | 0.358455979       | 0.334410625 | 7.19143316 |
| 39693 | AGI_OLIGO_NM_057749_1_1953   | CNCE2 ^ Cyclin E2 ^ 9134                                                                   | -4.384303253         | -1.4435      | 0.329242736       | 0.367674238 | 7.19143316 |
| 29859 | AGI_HUM1_OLIGO_A_24_P41918   | C14orf135 ^ Chromosome 14 open reading frame 135 ^ 64430                                   | -4.360187334         | -1.292345833 | 0.29639686        | 0.408286612 | 7.19143316 |
| 24048 | AGI_HUM1_OLIGO_A_23_P95002   | HIPK1 ^ Homeodomain interacting protein kinase 1 ^ 204851                                  | -4.349904527         | -0.827166667 | 0.19015743        | 0.563635089 | 7.19143316 |
| 29599 | AGI_HUM1_OLIGO_A_24_P404822  | APLN ^ Apelin, AGTRL1 ligand ^ 8862                                                        | -4.33775144          | -1.301666667 | 0.300078666       | 0.405657294 | 7.19143316 |
| 2471  | AGI_HUM1_OLIGO_A_23_P122516  | MICB ^ MHC class I polypeptide-related sequence B ^ 4277                                   | -4.293075935         | -1.045666667 | 0.243570503       | 0.484421007 | 7.19143316 |
| 13541 | AGI_HUM1_OLIGO_A_23_P323751  | C20orf129 ^ Chromosome 20 open reading frame 129 ^ 81610                                   | -4.290019437         | -1.467333333 | 0.342034192       | 0.361650153 | 7.19143316 |
| 35250 | AGI_HUM1_OLIGO_A_32_P5251    | RARA ^ Retinoic acid receptor, alpha ^ 5914                                                | -4.266548436         | -0.955666667 | 0.223990582       | 0.515603275 | 7.19143316 |
| 18088 | AGI_HUM1_OLIGO_A_23_P431268  | PLEKHA6 ^ Pleckstrin homolog domain containing, family A member 6 ^ 22874                  | -4.254623417         | -1.388       | 0.326233338       | 0.38209413  | 7.19143316 |
| 13344 | AGI_HUM1_OLIGO_A_23_P319432  | H2AFX ^ H2A histone family, member X ^ 3014                                                | -4.243703654         | -1.0805      | 0.254612501       | 0.472864912 | 7.19143316 |
| 31186 | AGI_HUM1_OLIGO_A_24_P82142   | TCF12 ^ Transcription factor 12 (HTF4, helix-loop-helix transcription factors 4) ^ 6938    | -4.210178892         | -0.946       | 0.22469354        | 0.519069635 | 7.19143316 |
| 2441  | AGI_HUM1_OLIGO_A_23_P122216  | LOX ^ Lysyl oxidase ^ 4015                                                                 | -4.181587966         | -0.817       | 0.195380321       | 0.567621051 | 7.19143316 |

|                                   |                                                                                                              |              |              |             |             |             |
|-----------------------------------|--------------------------------------------------------------------------------------------------------------|--------------|--------------|-------------|-------------|-------------|
| 19595 AGI_HUM1_OLIGO_A_23_P53891  | <a href="#">KLF5 ^ Kruppel-like factor 5 (intestinal) ^ 688</a>                                              | -4.153945112 | -0.595       | 0.143237328 | 0.662044455 | 7.19143316  |
| 27997 AGI_HUM1_OLIGO_A_24_P307695 | <a href="#">KIAA1764 ^ KIAA1764 protein ^ 85444</a>                                                          | -4.1530411   | -0.8965      | 0.215865911 | 0.537188379 | 7.19143316  |
| 11438 AGI_HUM1_OLIGO_A_23_P254702 | <a href="#">DEK ^ DEK oncogene (DNA binding) ^ 7913</a>                                                      | -4.150431433 | -1.268333333 | 0.305590721 | 0.415139083 | 7.19143316  |
| 1186 AGI_HUM1_OLIGO_A_23_P110585  | <a href="#">MGC21644 ^ Hypothetical protein MGC21644 ^ 153768</a>                                            | -4.149849499 | -0.739166667 | 0.178118909 | 0.599085298 | 7.19143316  |
| 6760 AGI_HUM1_OLIGO_A_23_P161616  | <a href="#">^ ^</a>                                                                                          | -4.080826648 | -1.339833333 | 0.328324001 | 0.395066293 | 7.85271438  |
| 37393 AGI_OLIGO_NKI_NM_003258     | <a href="#">TK1 ^ Thymidine kinase 1, soluble ^ 7083</a>                                                     | -4.071088219 | -0.873333333 | 0.214520857 | 0.545884132 | 7.85271438  |
| 29602 AGI_HUM1_OLIGO_A_24_P405002 | <a href="#">PDIK1L ^ PDLIM1 interacting kinase 1 like ^ 149420</a>                                           | -4.068075891 | -0.922833333 | 0.22684762  | 0.527472091 | 7.85271438  |
| 25334 AGI_HUM1_OLIGO_A_24_P142305 | <a href="#">HBA2 ^ Hemoglobin, alpha 2 ^ 3404</a>                                                            | -4.036014583 | -1.078233333 | 0.267152983 | 0.47360843  | 7.85271438  |
| 39528 AGI_OLIGO_NM_022914_1_1942  | <a href="#">PTOP ^ POT1 and TIN2 organizing protein ^ 65057</a>                                              | -4.029416485 | -0.836       | 0.20747421  | 0.560194607 | 7.85271438  |
| 28195 AGI_HUM1_OLIGO_A_24_P320665 | <a href="#">DRCTNNB1A ^ Down-regulated by Ctnnb1, a ^ 84668</a>                                              | -4.022271554 | -2.266298611 | 0.563437496 | 0.207862496 | 7.85271438  |
| 36573 AGI_OLIGO_AK095208_1_1724   | <a href="#">CD24 ^ CD24 antigen (small cell lung carcinoma cluster 4 antigen) ^ 934</a>                      | -4.010944891 | -1.556166667 | 0.387980067 | 0.340053426 | 7.85271438  |
| 20929 AGI_HUM1_OLIGO_A_23_P66081  | <a href="#">N4BP1 ^ Nedd4 binding protein 1 ^ 9683</a>                                                       | -4.010720977 | -0.601833333 | 0.150056146 | 0.658916092 | 7.85271438  |
| 18919 AGI_HUM1_OLIGO_A_23_P4922   | <a href="#">LOC374920 ^ Hypothetical protein LOC374920 ^ 374920</a>                                          | -3.973843355 | -0.651166667 | 0.163863195 | 0.636765171 | 7.85271438  |
| 22519 AGI_HUM1_OLIGO_A_23_P8055   | <a href="#">NRM ^ Nurim (nuclear envelope membrane protein) ^ 11270</a>                                      | -3.956641696 | -0.895833333 | 0.226412549 | 0.53743667  | 7.85271438  |
| 36572 AGI_OLIGO_AK095208_1_1543   | <a href="#">PAPD4 ^ PAP associated domain containing 4 ^ 167153</a>                                          | -3.943405137 | -1.780166667 | 0.451428804 | 0.29114976  | 7.85271438  |
| 19408 AGI_HUM1_OLIGO_A_23_P52082  | <a href="#">DKFZP434B168 ^ DKFZP434B168 protein ^ 25896</a>                                                  | -3.94257978  | -0.683333333 | 0.173321371 | 0.622724811 | 7.85271438  |
| 8251 AGI_HUM1_OLIGO_A_23_P200829  | <a href="#">^ ^</a>                                                                                          | -3.92297482  | -0.681       | 0.173592753 | 0.623732786 | 7.85271438  |
| 21115 AGI_HUM1_OLIGO_A_23_P6771   | <a href="#">LMCD1 ^ LIM and cysteine-rich domains 1 ^ 29995</a>                                              | -3.90866449  | -1.234833333 | 0.315922059 | 0.424891582 | 7.85271438  |
| 39918 O_BU621315                  | <a href="#">BCAR3 ^ Breast cancer anti-estrogen resistance 3 ^ 8412</a>                                      | -3.908274186 | -1.289516667 | 0.329945292 | 0.409088059 | 7.85271438  |
| 14436 AGI_HUM1_OLIGO_A_23_P345674 | <a href="#">ZNF71 ^ Zinc finger protein 71 (Cos26) ^ 58491</a>                                               | -3.884776315 | -1.1095      | 0.28560203  | 0.463454624 | 7.85271438  |
| 39839 AGI_OLIGO_Z24725_1_3105     | <a href="#">PLEKH1 ^ Pleckstrin homology domain containing, family C (with FERM domain) member 1 ^ 10979</a> | -3.878555984 | -1.28        | 0.33001973  | 0.411795509 | 7.85271438  |
| 39694 AGI_OLIGO_NM_057749_1_2020  | <a href="#">CCNE2 ^ Cyclin E2 ^ 9134</a>                                                                     | -3.869374585 | -1.0055      | 0.259861117 | 0.498097474 | 7.85271438  |
| 39389 AGI_OLIGO_NM_018410_2_2344  | <a href="#">DKFZp762E1312 ^ Hypothetical protein DKFZp762E1312 ^ 55355</a>                                   | -3.860496371 | -0.796       | 0.206191102 | 0.575943821 | 7.85271438  |
| 28700 AGI_HUM1_OLIGO_A_24_P349002 | <a href="#">^ ^</a>                                                                                          | -3.844138238 | -1.2115      | 0.31515516  | 0.431819411 | 7.85271438  |
| 7667 AGI_HUM1_OLIGO_A_23_P169766  | <a href="#">^ ^</a>                                                                                          | -3.841967073 | -1.553333333 | 0.404306779 | 0.340721919 | 7.85271438  |
| 12651 AGI_HUM1_OLIGO_A_23_P303455 | <a href="#">GPR161 ^ G protein-coupled receptor 161 ^ 23432</a>                                              | -3.835346667 | -0.794       | 0.207021703 | 0.576742803 | 7.85271438  |
| 35515 AGI_HUM1_OLIGO_A_32_P70372  | <a href="#">RPL13A ^ Ribosomal protein L13a ^ 23521</a>                                                      | -3.830954572 | -1.371574074 | 0.358024103 | 0.386469355 | 7.85271438  |
| 29333 AGI_HUM1_OLIGO_A_23_P38895  | <a href="#">H2AFX ^ H2A histone family, member X ^ 3014</a>                                                  | -3.824797151 | -1.084       | 0.283413723 | 0.471719125 | 7.852702104 |
| 15436 AGI_HUM1_OLIGO_A_23_P368886 | <a href="#">CSS3 ^ Chondroitin sulfate synthase 3 ^ 337876</a>                                               | -3.812303035 | -1.931194444 | 0.506568976 | 0.262211989 | 0.89702104  |
| 28516 AGI_HUM1_OLIGO_A_24_P339416 | <a href="#">KIAA1001 ^ Arylsulfatase G ^ 22901</a>                                                           | -3.800797796 | -1.476319444 | 0.388423569 | 0.359404544 | 0.89702104  |
| 28704 AGI_HUM1_OLIGO_A_24_P349207 | <a href="#">FLJ40092 ^ FLJ40092 protein ^ 401196</a>                                                         | -3.796711374 | -0.61135     | 0.161020931 | 0.654583889 | 0.89702104  |
| 15907 AGI_HUM1_OLIGO_A_23_P379649 | <a href="#">BMF ^ Bcl2 modifying factor ^ 90427</a>                                                          | -3.792619872 | -1.433037037 | 0.377848845 | 0.370350442 | 0.89702104  |
| 8560 AGI_HUM1_OLIGO_A_23_P203332  | <a href="#">FLJ22794 ^ FLJ22794 protein ^ 63901</a>                                                          | -3.786041357 | -1.265       | 0.334122077 | 0.416099367 | 0.89702104  |
| 37409 AGI_OLIGO_NKI_NM_004456     | <a href="#">EZH2 ^ Enhancer of zeste homolog 2 (Drosophila) ^ 2146</a>                                       | -3.785551338 | -1.231666667 | 0.325359916 | 0.425825229 | 0.89702104  |
| 36148 AGI_OLIGO_AB051487_1_4677   | <a href="#">DUSP16 ^ Dual specificity phosphatase 16 ^ 80824</a>                                             | -3.777171216 | -1.6115      | 0.426642031 | 0.327257917 | 0.89702104  |
| 38521 AGI_OLIGO_NM_004346_2_2430  | <a href="#">CASP3 ^ Caspase 3, apoptosis-related cysteine protease ^ 836</a>                                 | -3.77497773  | -1.209833333 | 0.320487542 | 0.432318556 | 0.89702104  |
| 9265 AGI_HUM1_OLIGO_A_23_P208880  | <a href="#">UHFR1 ^ Ubiquitin-like, containing PHD and RING finger domains, 1 ^ 29128</a>                    | -3.77067845  | -1.036666667 | 0.274928419 | 0.487452428 | 0.89702104  |
| 6924 AGI_HUM1_OLIGO_A_23_P163099  | <a href="#">POLE2 ^ Polymerase (DNA directed), epsilon 2 (p59 subunit) ^ 5427</a>                            | -3.749180235 | -0.828666667 | 0.221026095 | 0.56304937  | 0.89702104  |
| 21543 AGI_HUM1_OLIGO_A_23_P71644  | <a href="#">FANCG ^ Fanconi anemia, complementation group G ^ 2189</a>                                       | -3.742406461 | -0.736666667 | 0.196843041 | 0.600124333 | 0.89702104  |
| 33578 AGI_HUM1_OLIGO_A_32_P167239 | <a href="#">FLJ36748 ^ Hypothetical protein FLJ36748 ^ 134265</a>                                            | -3.726775023 | -1.251666667 | 0.335857855 | 0.419962767 | 0.89702104  |
| 3184 AGI_HUM1_OLIGO_A_23_P129169  | <a href="#">CYP11A1 ^ Cytochrome P450, family 11, subfamily A, polypeptide 1 ^ 1583</a>                      | -3.720312447 | -0.652583333 | 0.175410894 | 0.636140201 | 0.89702104  |
| 6709 AGI_HUM1_OLIGO_A_23_P161194  | <a href="#">VIM ^ Vimentin ^ 7431</a>                                                                        | -3.677621104 | -1.083333333 | 0.294574482 | 0.471937156 | 0.89702104  |
| 31236 AGI_HUM1_OLIGO_A_24_P8371   | <a href="#">LOC124976 ^ Hypothetical protein LOC124976 ^ 124976</a>                                          | -3.671260101 | -1.527       | 0.415933483 | 0.34699818  | 0.89702104  |
| 3530 AGI_HUM1_OLIGO_A_23_P132226  | <a href="#">^ ^</a>                                                                                          | -3.670450261 | -0.978666667 | 0.266633954 | 0.507448505 | 0.89702104  |
| 34123 AGI_HUM1_OLIGO_A_32_P20535  | <a href="#">RAD23B ^ RAD23 homolog B (S. cerevisiae) ^ 5887</a>                                              | -3.669331713 | -2.7315      | 0.744413483 | 0.150569347 | 0.89702104  |
| 35961 AGI_HUM1_OLIGO_A_32_P96845  | <a href="#">PTPN4 ^ Protein tyrosine phosphatase, non-receptor type 4 (megakaryocyte) ^ 5775</a>             | -3.668815977 | -2.111666667 | 0.575571705 | 0.231379561 | 0.89702104  |
| 10581 AGI_HUM1_OLIGO_A_23_P22224  | <a href="#">EIF4EBP1 ^ Eukaryotic translation initiation factor 4E binding protein 1 ^ 1978</a>              | -3.662765902 | -1.556666667 | 0.424997586 | 0.339935593 | 0.89702104  |
| 1185 AGI_HUM1_OLIGO_A_23_P110571  | <a href="#">^ ^</a>                                                                                          | -3.660193267 | -0.678       | 0.18523612  | 0.625031151 | 0.89702104  |
| 1080 AGI_HUM1_OLIGO_A_23_P109539  | <a href="#">APOBEC3B ^ Apolipoprotein B mRNA editing enzyme, catalytic polypeptide-like 3B ^ 9582</a>        | -3.656622765 | -1.37        | 0.374662657 | 0.386891248 | 0.89702104  |
| 20376 AGI_HUM1_OLIGO_A_23_P60829  | <a href="#">HIPK2 ^ Homeodomain interacting protein kinase 2 ^ 28996</a>                                     | -3.653675058 | -2.033       | 0.556426055 | 0.244346442 | 0.89702104  |
| 19636 AGI_HUM1_OLIGO_A_23_P54283  | <a href="#">CRI1 ^ CREBBP/EP300 inhibitor 1 ^ 23741</a>                                                      | -3.650991478 | -0.697166667 | 0.190952696 | 0.616782327 | 0.89702104  |
| 22398 AGI_HUM1_OLIGO_A_23_P79429  | <a href="#">DKFZp762E1312 ^ Hypothetical protein DKFZp762E1312 ^ 55355</a>                                   | -3.649382535 | -0.881666667 | 0.241593381 | 0.542740071 | 0.89702104  |
| 11994 AGI_HUM1_OLIGO_A_23_P259641 | <a href="#">EZH2 ^ Enhancer of zeste homolog 2 (Drosophila) ^ 2146</a>                                       | -3.637979701 | -1.18        | 0.324355851 | 0.441351498 | 0.89702104  |
| 37798 AGI_OLIGO_NM_001071_1_1432  | <a href="#">TYMS ^ Thymidylate synthetase ^ 7298</a>                                                         | -3.637000184 | -0.910666667 | 0.250389502 | 0.531939226 | 0.89702104  |
| 24926 AGI_HUM1_OLIGO_A_24_P117902 | <a href="#">OSBPL10 ^ Oxysterol binding protein-like 10 ^ 114884</a>                                         | -3.635949564 | -1.288833333 | 0.35446953  | 0.40928187  | 0.89702104  |
| 35396 AGI_HUM1_OLIGO_A_32_P61708  | <a href="#">^ ^</a>                                                                                          | -3.628040485 | -1.056333333 | 0.291158089 | 0.480852614 | 0.89702104  |
| 10135 AGI_HUM1_OLIGO_A_23_P215900 | <a href="#">SCARA3 ^ Scavenger receptor class A, member 3 ^ 51435</a>                                        | -3.620967416 | -0.894666667 | 0.247079458 | 0.537871456 | 0.89702104  |
| 11348 AGI_HUM1_OLIGO_A_23_P253873 | <a href="#">DNAH11 ^ Dynein, axonemal, heavy polypeptide 11 ^ 8701</a>                                       | -3.619691646 | -0.770333333 | 0.212817391 | 0.586281999 | 0.89702104  |
| 38788 AGI_OLIGO_NM_005596_1_1938  | <a href="#">NFIB ^ Nuclear factor I/B ^ 4781</a>                                                             | -3.611313905 | -0.829166667 | 0.229602491 | 0.562854266 | 0.89702104  |

|       |                             |                                                                                           |              |              |             |             |            |
|-------|-----------------------------|-------------------------------------------------------------------------------------------|--------------|--------------|-------------|-------------|------------|
| 17569 | AGI_HUM1_OLIGO_A_23_P419038 | <a href="#">CLOCK ^ Clock homolog (mouse) ^ 9575</a>                                      | -3.609310445 | -0.8405      | 0.232869966 | 0.558449991 | 8.09702104 |
| 25747 | AGI_HUM1_OLIGO_A_24_P168760 | <a href="#">GTPBP1 ^ GTP binding protein 1 ^ 9567</a>                                     | -3.607893357 | -0.623166667 | 0.172723139 | 0.649244293 | 8.09702104 |
| 12754 | AGI_HUM1_OLIGO_A_23_P305759 | <a href="#">ABHD3 ^ Abhydrolase domain containing 3 ^ 171586</a>                          | -3.60419027  | -0.603       | 0.167305263 | 0.658383461 | 8.09702104 |
| 7687  | AGI_HUM1_OLIGO_A_23_P169978 | <a href="#">ZNF608 ^ Zinc finger protein 608 ^ 57507</a>                                  | -3.602653523 | -0.971666667 | 0.269708608 | 0.509916644 | 8.09702104 |
| 37471 | AGI_OLIGO_NKI_NM_018410     | <a href="#">DKFZp762E1312 ^ Hypothetical protein DKFZp762E1312 ^ 55355</a>                | -3.585321843 | -0.805       | 0.224526566 | 0.57236208  | 8.09702104 |
| 18408 | AGI_HUM1_OLIGO_A_23_P44505  | <a href="#">KLF11 ^ Kruppel-like factor 11 ^ 8462</a>                                     | -3.561355379 | -1.0425      | 0.292725631 | 0.485485462 | 8.09702104 |
| 7665  | AGI_HUM1_OLIGO_A_23_P169756 | <a href="#">HIPK2 ^ Homeodomain interacting protein kinase 2 ^ 28996</a>                  | -3.550007253 | -1.712       | 0.482252536 | 0.305236628 | 8.09702104 |
| 39013 | AGI_OLIGO_NM_007144_1_1758  | <a href="#">RNF110 ^ Ring finger protein 110 ^ 7703</a>                                   | -3.54100678  | -1.218833333 | 0.344205309 | 0.429630007 | 8.09702104 |
| 36088 | AGI_OLIGO_AB023166_1_5083   | <a href="#">CIT ^ Citron (rho-interacting, serine/threonine kinase 21) ^ 11113</a>        | -3.535090837 | -0.687833333 | 0.194573029 | 0.620785458 | 8.09702104 |
| 12491 | AGI_HUM1_OLIGO_A_23_P29985  | <a href="#">FLJ35725 ^ Hypothetical protein FLJ35725 ^ 152992</a>                         | -3.516452081 | -0.714       | 0.203045565 | 0.609627547 | 8.44800079 |
| 22316 | AGI_HUM1_OLIGO_A_23_P7873   | <a href="#">MCM3 ^ MCM3 minichromosome maintenance deficient 3 (S. cerevisiae) ^ 4172</a> | -3.508729049 | -0.875       | 0.249378048 | 0.545253866 | 8.44800079 |
| 1720  | AGI_HUM1_OLIGO_A_23_P115872 | <a href="#">C10orf3 ^ Chromosome 10 open reading frame 3 ^ 55165</a>                      | -3.487816314 | -0.793333333 | 0.227458462 | 0.577009376 | 8.44800079 |
| 9711  | AGI_HUM1_OLIGO_A_23_P212469 | <a href="#">ENTPD3 ^ Ectonucleoside triphosphate diphosphohydrolase 3 ^ 956</a>           | -3.481966447 | -1.728285185 | 0.496353199 | 0.301810481 | 8.44800079 |

#### Estimated Miss rates for Delta=1.029

| Quantiles    | Cutpoints        | Miss Rate(%) |
|--------------|------------------|--------------|
| 0 -> 0.05    | -3.445 -> -1.554 | 46.41        |
| 0.05 -> 0.1  | -1.554 -> -1.161 | 17.37        |
| 0.1 -> 0.15  | -1.161 -> -0.91  | 5.57         |
| 0.15 -> 0.2  | -0.91 -> -0.72   | 0.76         |
| 0.2 -> 0.25  | -0.72 -> -0.557  | 0            |
| 0.25 -> 0.75 | -0.557 -> 0.618  | 0.67         |
| 0.75 -> 0.8  | 0.618 -> 0.761   | 10.25        |
| 0.8 -> 0.85  | 0.761 -> 0.928   | 13.66        |
| 0.85 -> 0.9  | 0.928 -> 1.149   | 15.08        |
| 0.9 -> 0.95  | 1.149 -> 1.475   | 24.37        |
| 0.95 -> 1    | 1.475 -> 4.494   | 40.25        |

#### Input parameters

|                                                |                    |
|------------------------------------------------|--------------------|
| Data type?                                     | Two class unpaired |
| Arrays centered?                               | FALSE              |
| Delta                                          | 1.029              |
| Minimum fold change                            | 0                  |
| Test statistic                                 | standard           |
| Are data are log scale?                        | TRUE               |
| Number of permutations                         | 100                |
| Input percentile for exchangeability factor s0 | Automatic choice   |
| Number of neighbors for KNN                    | 10                 |
| Seed for Random number generator               | 1234567            |

#### Computed values

|                                            |            |
|--------------------------------------------|------------|
| Estimate of pi0 (proportion of null genes) | 0.91091487 |
| Exchangibility factor s0                   | 0.08002002 |
| s0 percentile                              | 5.00087559 |
| False Discovery Rate (%)                   | 8.44800079 |

#### Current settings

List of Significant Genes for Delta = 1.029
