# Supplementary material
Source: PubMed Central journal article supplement (PMC4310213)
Supplement: NIHMS637782-supplement-8.pdf [file NIHMS637782-supplement-8.pdf]

**Supplementary Table S6.**

**Cox model disease specific-survival analysis in the METABRIC set (n=1,848)**

| Variables                              | Multivariable Analysis |           |           |         |
|----------------------------------------|------------------------|-----------|-----------|---------|
|                                        | HR                     | Lower 95% | Upper 95% | p-value |
| <b>Validation set vs. Training set</b> | 0.665                  | 0.551     | 0.802     | <0.001  |
| <b>Tumor size</b>                      |                        |           |           |         |
| T2 vs. T0-1                            | 1.363                  | 1.119     | 1.659     | 0.002   |
| T3 vs. T0-1                            | 1.842                  | 1.129     | 3.004     | 0.014   |
| <b>Nodal status</b>                    |                        |           |           |         |
| 1-3 vs. 0                              | 1.439                  | 1.120     | 1.847     | 0.004   |
| >3 vs. 0                               | 2.922                  | 2.236     | 3.818     | <0.001  |
| <b>Grade</b>                           |                        |           |           |         |
| 1-3 vs. 0                              | 1.175                  | 0.756     | 1.827     | 0.473   |
| >3 vs. 0                               | 1.116                  | 0.706     | 1.764     | 0.638   |
| <b>Age</b>                             | 1.021                  | 1.012     | 1.029     | <0.001  |
| <b>PAM50 Subtype</b>                   |                        |           |           |         |
| Luminal A                              | 1.000                  | -         | -         | -       |
| Luminal B                              | 1.096                  | 0.767     | 1.565     | 0.615   |
| Basal-like                             | 1.309                  | 0.856     | 2.003     | 0.214   |
| HER2E                                  | 1.448                  | 0.982     | 2.134     | 0.062   |
| Normal-like                            | 1.069                  | 0.713     | 1.602     | 0.746   |
| <b>Systemic treatment</b>              |                        |           |           |         |
| Chemo vs. None                         | 1.693                  | 1.140     | 2.512     | 0.009   |
| HT vs. None                            | 0.971                  | 0.644     | 1.462     | 0.887   |
| Chemo/HT vs. None                      | 0.910                  | 0.689     | 1.201     | 0.504   |
| <b>Proliferation 11-gene signature</b> | 1.354                  | 0.938     | 1.953     | 0.106   |
| <b>miR138 activity signature</b>       | 0.998                  | 0.997     | 1.000     | 0.011   |
